# Supplementary material
Source: PubMed Central journal article supplement (PMC4899211)
Supplement: NIHMS783998-supplement-1.pdf [file NIHMS783998-supplement-1.pdf]

**Structure, Volume 24**

**Supplemental Information**

**Structural and Functional Characterization  
of the LPS Transporter LptDE  
from Gram-Negative Pathogens**

**Istvan Botos, Nadim Majdalani, Stephen J. Mayclin, Jennifer Gehret McCarthy, Karl Lundquist, Damian Wojtowicz, Travis J. Barnard, James C. Gumbart, and Susan K. Buchanan**

Supplementary Information for:

**Structural and Functional Characterization of the LPS Transporter LptDE  
from Gram-negative Pathogens**

Istvan Botos<sup>1\*</sup>, Nadim Majdalani<sup>2\*</sup>, Stephen J. Mayclin<sup>1\*</sup>, Jennifer Gehret McCarthy<sup>1\*</sup>, Karl Lundquist<sup>3</sup>, Damian Wojtowicz<sup>4</sup>, Travis J. Barnard<sup>1</sup>, James C. Gumbart<sup>3</sup>, and Susan K. Buchanan<sup>1</sup>

<sup>1</sup>Laboratory of Molecular Biology, National Institute of Diabetes and Digestive and Kidney Diseases, National Institutes of Health, Bethesda, MD 20892, USA; <sup>2</sup>Laboratory of Molecular Biology, National Cancer Institute, National Institutes of Health, Bethesda, MD 20892, USA; <sup>3</sup>School of Physics, Georgia Institute of Technology, Atlanta, GA 30332, USA; <sup>4</sup>National Center for Biotechnology Information, National Institutes of Health, Bethesda, MD 20892 USA. \*These authors contributed equally to this work.  
Correspondence: [skbuchan@helix.nih.gov](mailto:skbuchan@helix.nih.gov)

Supplementary Figures:

- Figure S1: LptD and LptE structural alignments
- Figure S2: Sequence alignment of determined LptDE structures
- Figure S3: Global sequence conservation in LptD and LptE
- Figure S4: Side (3/4) view and top view of *Pa*LptDE
- Figure S5: Positioning of LptE within the LptD lumen
- Figure S6: Hollow representations of LptDE structures
- Figure S7: *In silico* modeling of charge mutations in the luminal cavity

Supplementary Tables:

- Table S1: Length of LptD and LptE constructs used in this study
- Table S2: Surface area analysis of known LptDE structures

Supplementary Experimental Procedures

**A**

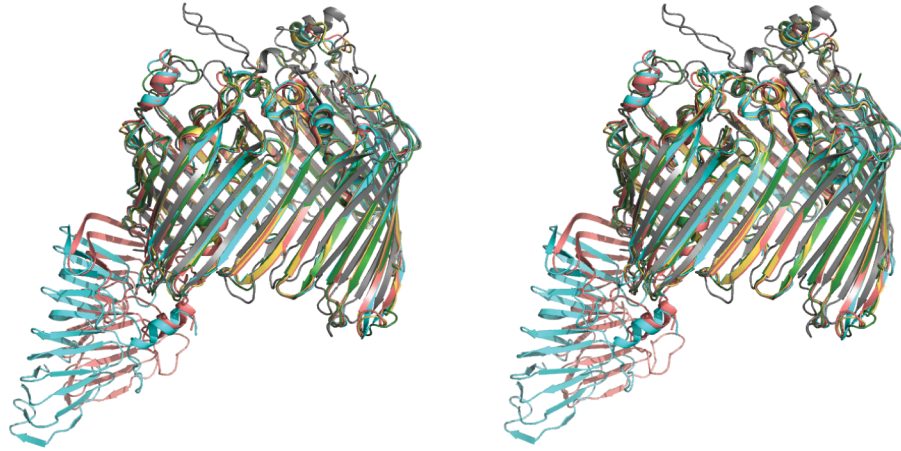

**B**

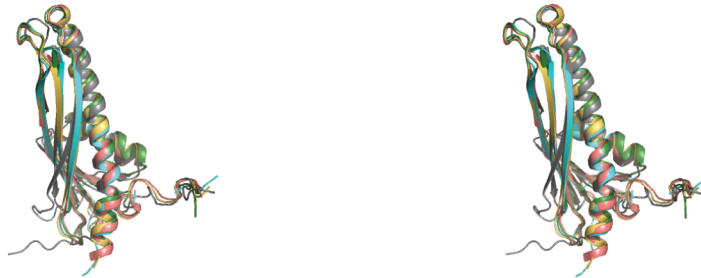

**Figure S1** (Related to Figure 1): **LptD and LptE structural alignments.** LptD (a) and LptE (b) structural alignment stereo diagrams: *Yp*LptDE (green), full-length *Kp*LptDE (cyan), *Pa*LptDE (gray), *Sfl*LptDE (salmon) PDBID = 4Q35, *St*LptDE (yellow) PDBID = 4N4R

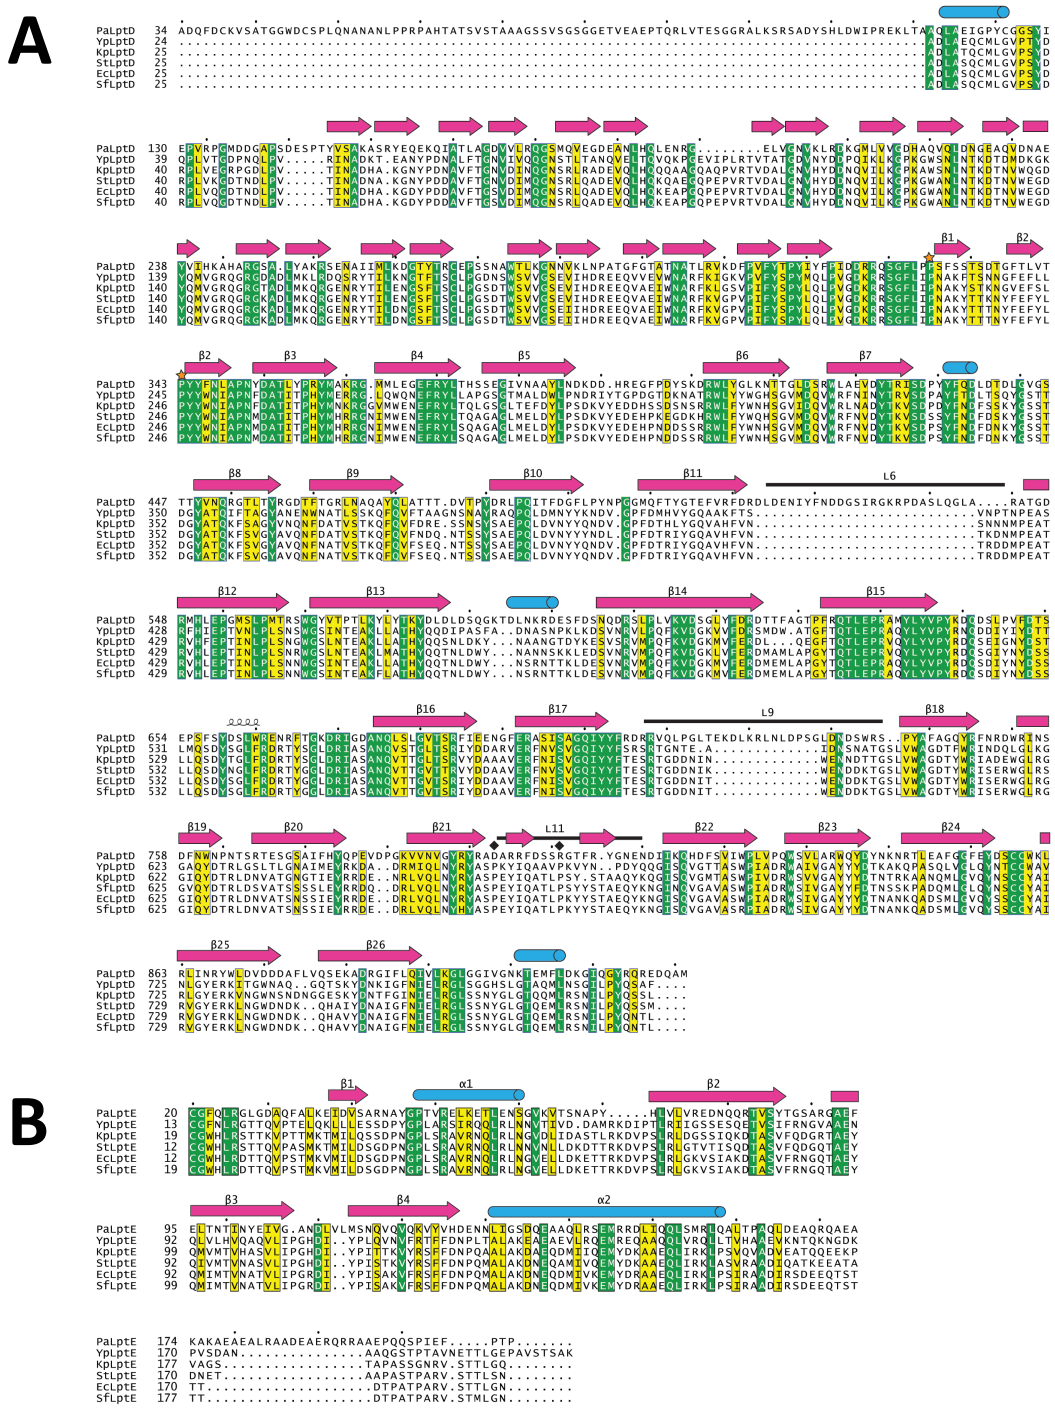

**Figure S2 (Related to experimental procedures): Sequence alignment of known LptDE structures. (A) LptD and (B) LptE. In (A) extracellular loops L6, L9, and L11 are indicated by a solid black line. Gold stars indicate the strictly conserved proline residues that are part of the lateral gate. Proline residues conserved in most LptD sequences but not in PaLptD are indicated by black diamonds. In (A) and (B),  $\beta$ -strands are shown in magenta,  $\alpha$ -helices in blue, conserved residues are in green blocks, and residues with high sequence similarity in yellow. Alignments generated with Clustal Omega and ESript.**



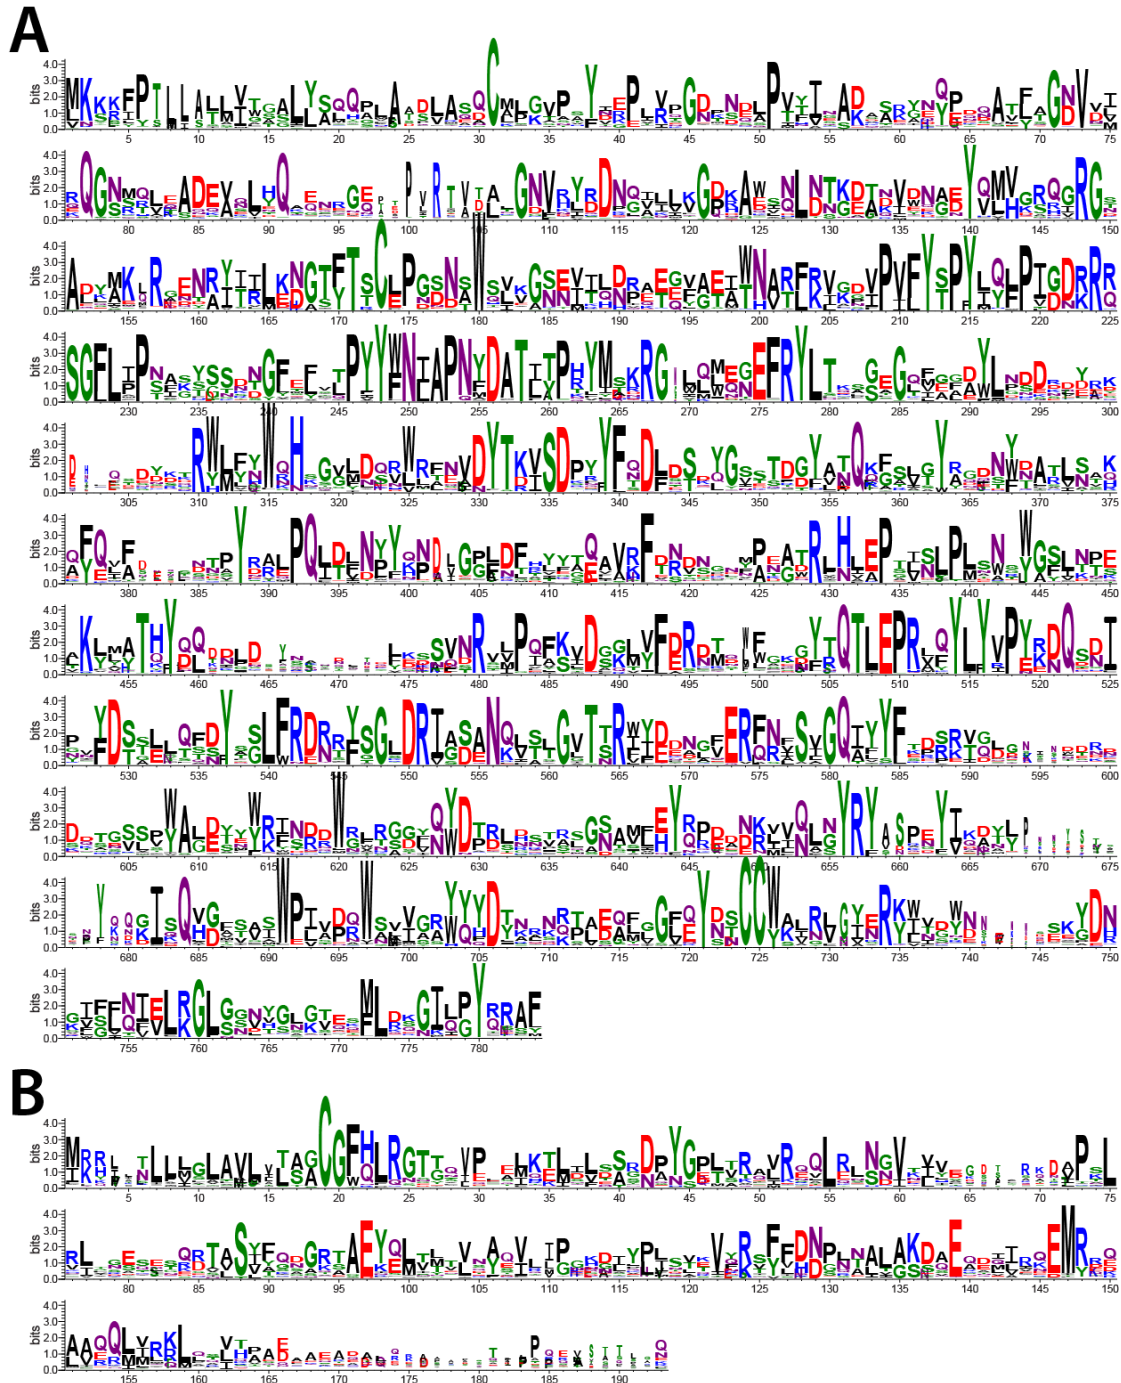

**Figure S3** (Related to experimental procedures): **Global sequence conservation in LptD and LptE.** A selection of the family of LptD and LptE sequences were analyzed for sequence conservation. **(A)** LptD sequences from 222 species were aligned. Insertions not found in the *E. coli* sequence were truncated, for clarity. **(B)** Alignment of LptE sequences from 281 species. Insertions not found in *E. coli* were truncated. Height of the letter represents prevalence of the residue at that position.

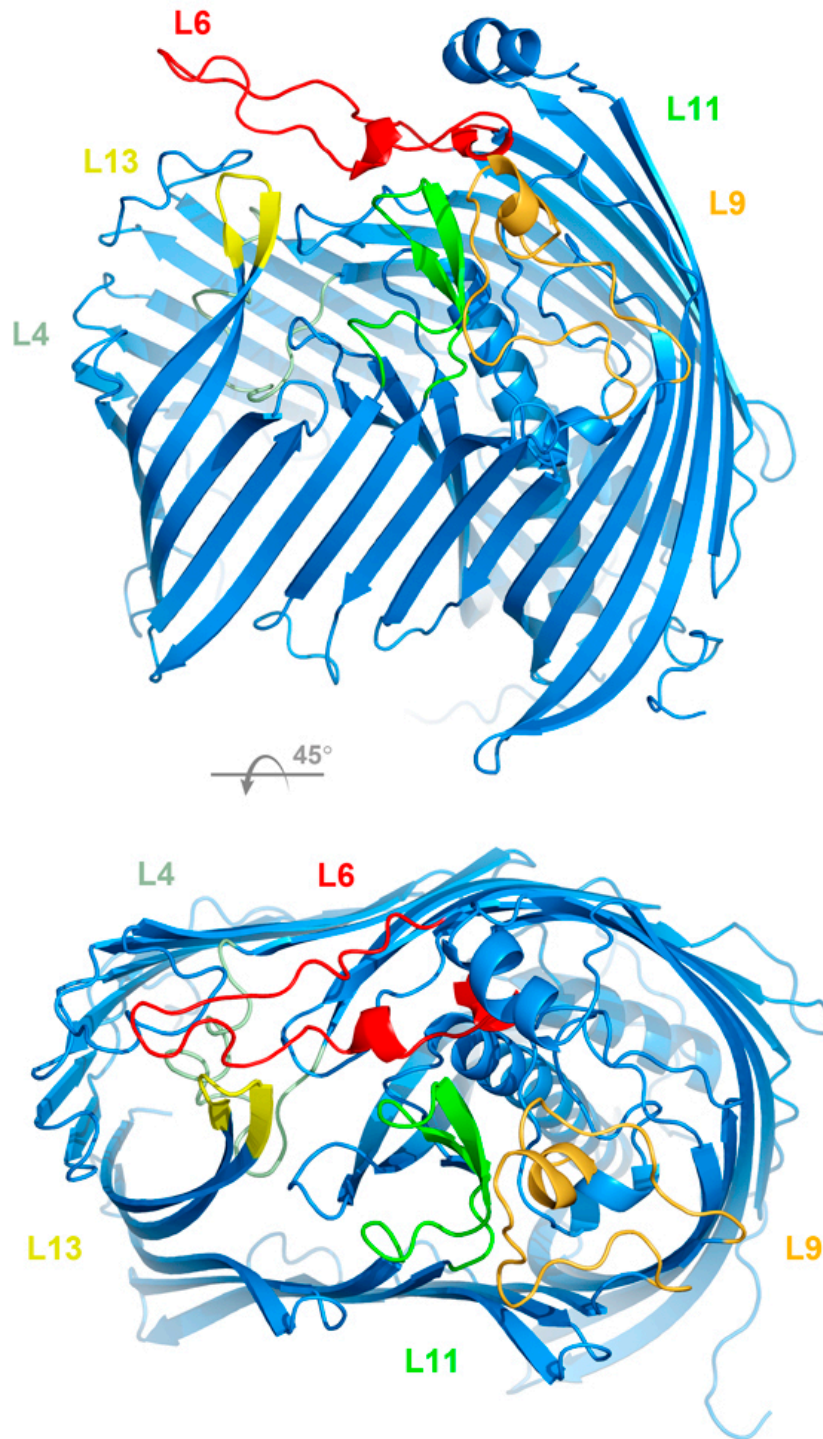

**Figure S4** (Related to Figure 1): **Side(3/4) view and top view of PaLptDE.** PaLptDE is shown in blue, with several extracellular loops highlighted: L4 in gray, L6 in red, L9 in orange, L11 in green, and L13 in yellow. Compared to the four other LptDe structures, L6 contains a 23-residue insertion and L9 contains an 11-residue insertion and divergent sequence.

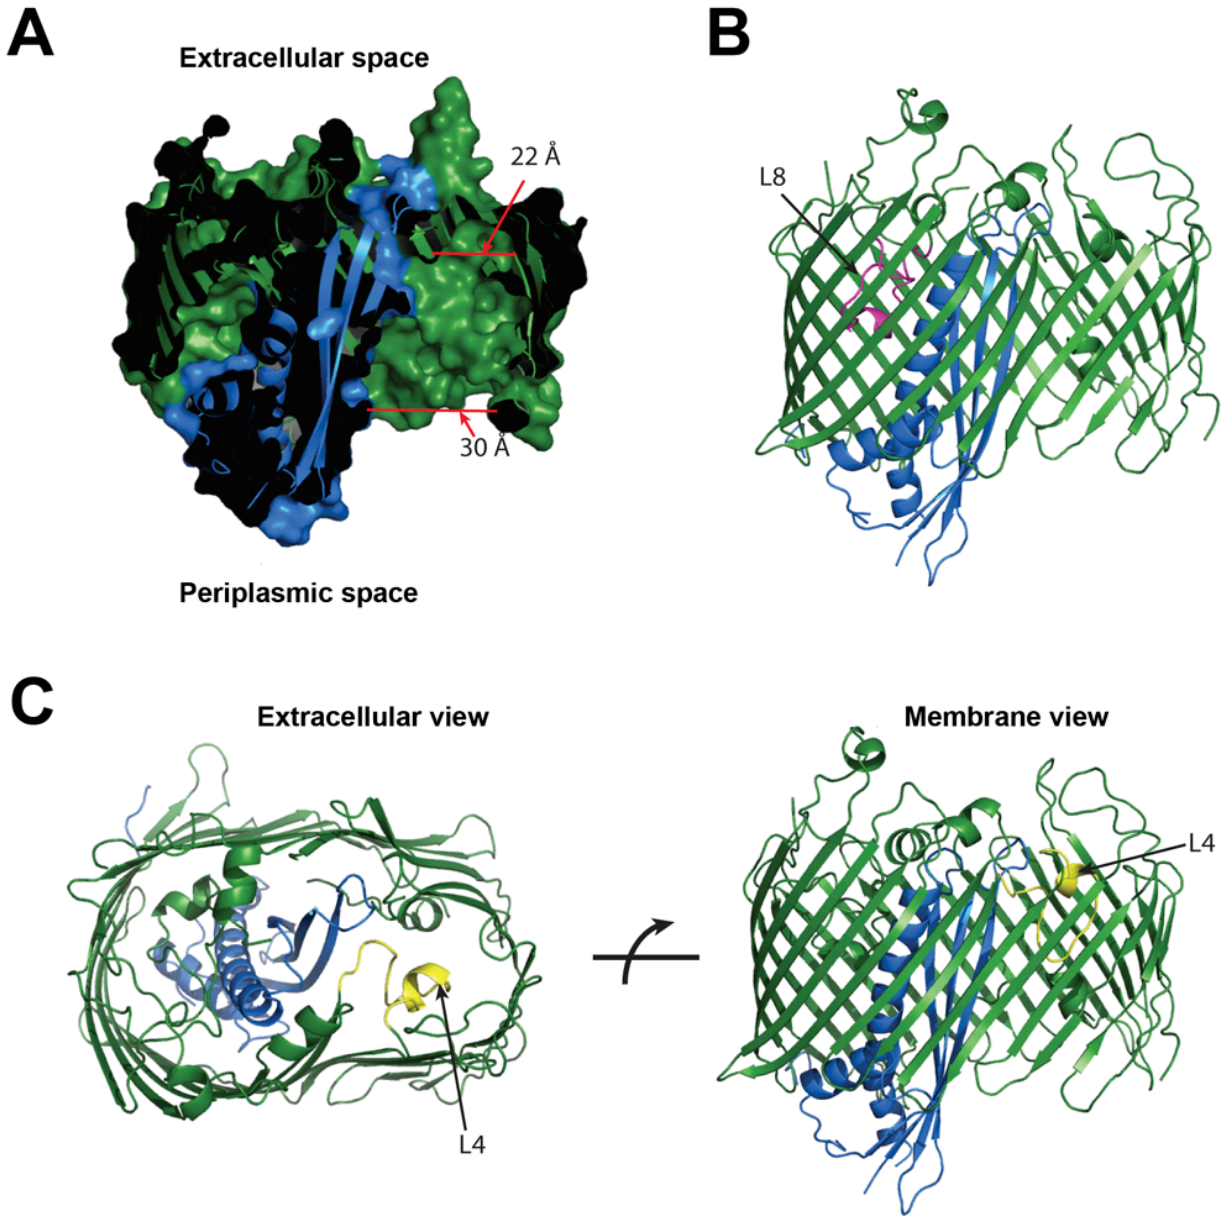

**Figure S5** (Related to Figure 1): **Positioning of LptE within the LptD lumen.** **a.** Cutaway surface of *YpLptD* (green) and *YpLptE* (blue) complex viewed from the membrane. The luminal cavity tapers from 30 Å at the periplasm to 22 Å deep in the cavity near the extracellular space. **b.** L8 (magenta) of LptD (green) folds into the lumen of the barrel, causing LptE (blue) to reside at an angle within LptD. This results in a tapering of the luminal cavity in the LptD barrel. View is the same as in **a.** **c.** L4 (yellow) of LptD (green) blocks the exit of LPS from the lumen into the extracellular space and likely moves to create an exit pore.



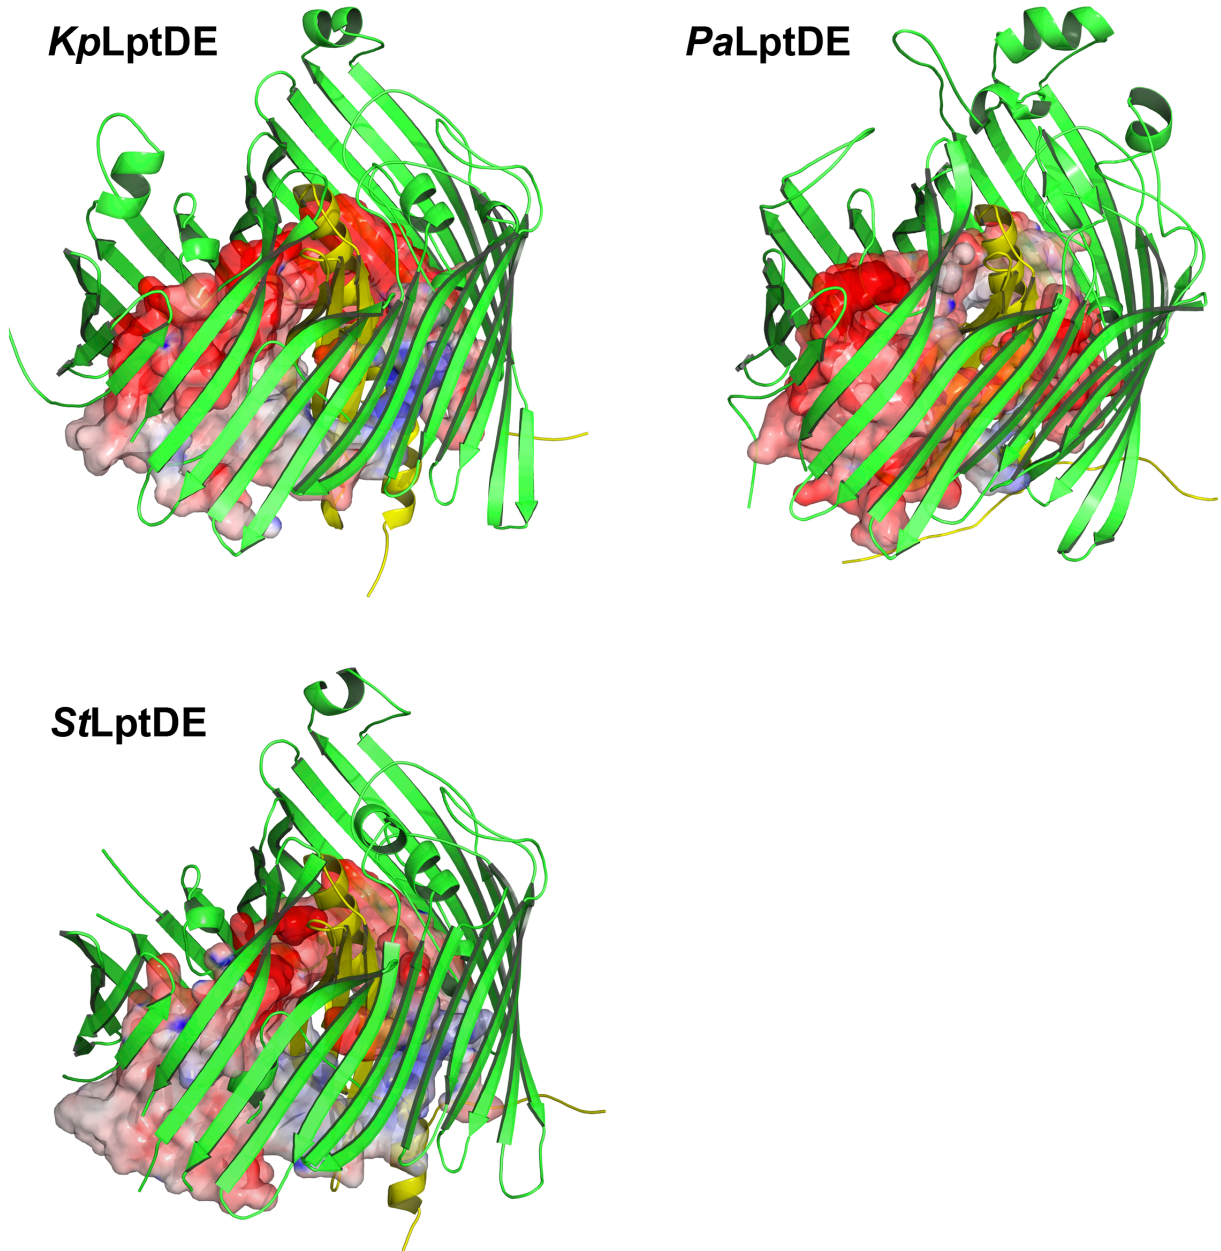

**Figure S6** (Related to Figure 7): **Hollow representations of LptDE structures.** The solid surface is a casting of the lumenal cavity of *K. pneumoniae*, *P. aeruginosa* and *S. typhimurium* (PDBID 4N4R) LptDE generated by populating all open areas with water molecules using the program Hollow. Positive areas are represented in blue (+20kT), neutral in white, and negative in red (-20 kT). The electrostatic surface was generated using APBS.

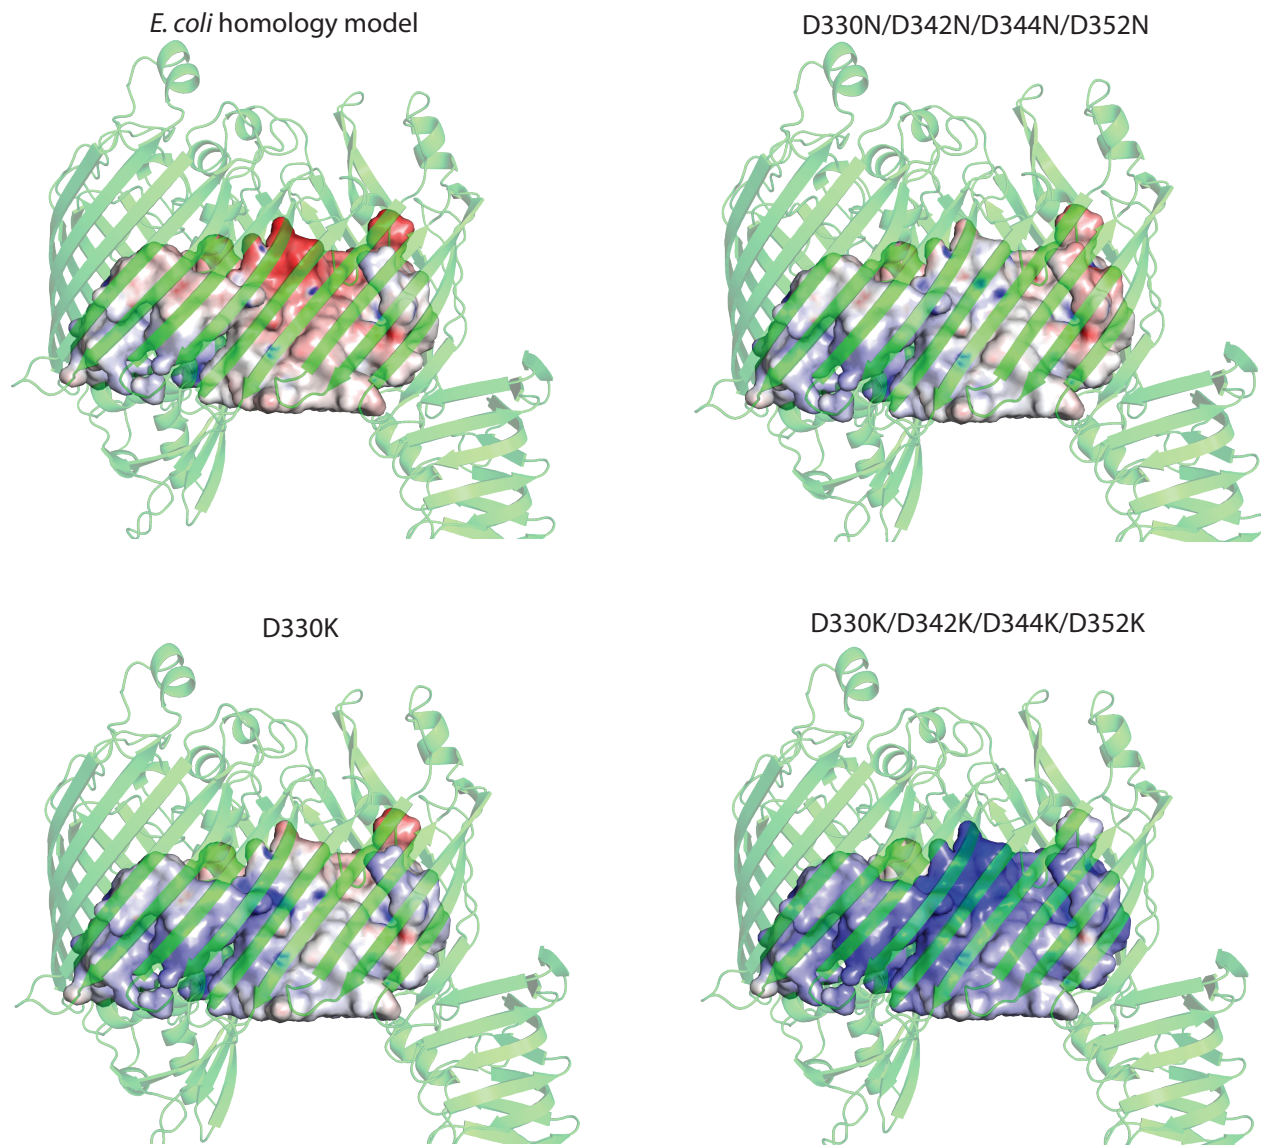

**Figure S7** (Related to Figure 7): ***In silico* modeling of charge mutations in the lumenal cavity.** A homology model of *E. coli* LptDE complex was generated from *Sf*LptDE (PDB ID 4Q35). Electrostatic charge of the lumen is mapped onto a surface representing non-protein occupied space within the lumen. Conserved aspartic acid residues were mutated *in silico* to asparagine or lysine residues. Luminal electrostatics are mapped onto the lumen surface.

**Supplemental Table 1** (Related to Figures 1 and 3): Length of LptD and LptE constructs used in this study

| Construct                   | LptD residues | LptE residues | PDB code |
|-----------------------------|---------------|---------------|----------|
| <i>Yp</i> LptDE             | 225 – 780     | 21 – 207      | 5IXM     |
| <i>Kp</i> LptDE             | 203 – 782     | 21 – 196      | 5IV8     |
| Full-length <i>Kp</i> LptDE | 25 – 782      | 20 – 196      | 5IV9     |
| <i>Pa</i> LptDE             | 301 – 924     | 21 – 207      | 5IVA     |

## Supplemental Experimental Procedures

### Cloning, expression and purification of LptDE

Primer names and sequences used for LIC cloning are listed in the Table below. The modified pET9 vector, into which LptD was inserted, contained an N-terminal PelB signal sequence, a 10X His tag, a TEV site, and LIC cloning sites. The modified pCDF-1b vector for LptE expression contained the PelB signal sequence, LIC cloning sites, and a C-terminal 6X His tag. LptD and LptE for each species were co-expressed in BL21 (DE3) cells in TB media supplemented with 50µg/ml kanamycin and 25µg/ml streptomycin to stationary phase (3-4 days). The cells were grown at 21°C without IPTG induction.

To make the pBAD24\_LptD\_WT plasmid, *E. coli* LptD (residues 1 – 784) was cloned into pBAD24 using primers pBAD24\_LptD\_NcoI\_for2 and pBAD24\_LptD\_HindIII\_rev2. A C-terminal 10X histidine tag was subsequently inserted into this vector using primers pBAD\_LptD\_chis10\_for and pBAD\_LptD\_chis10\_rev to create pBAD24\_LptD\_WTchis. This vector and its mutant derivatives were used in the LptD knock-out and localization assays.

| Primer sequences and names/numbers for constructs used in this study |                  |                           |                                                             |
|----------------------------------------------------------------------|------------------|---------------------------|-------------------------------------------------------------|
| Function:                                                            | Gene:            | Name:                     | Sequence (5'-3'):                                           |
| Expression                                                           | LptD_Yersinia    | LptD_Yersinia225_pET9_for | TACTTCCAATCCATGCTGGATTCTGATTCCGAACGCC                       |
|                                                                      | LptD_Yersinia    | LptD_Yersinia_pET9_rev    | TATCCACCTTTACTGTTATTAGAATGCGCTCTGATACGGCAG                  |
|                                                                      | LptE_Yersinia    | LptE_Yersinia_pCDF-SS_for | CTCCTAACACCTCGGGCTTTAACCTGCGTGGCAC                          |
|                                                                      | LptE_Yersinia    | LptE_Yersinia_pCDF-SS_rev | CATCCATCATCAATGGTGATGGTGATGGTGGTGGCCGAGGTTGAGACC            |
|                                                                      | LptD_Klebsiella  | LptD_Kleb_25f_NTT         | TACTTCCAATCCATGGCCGATCTGGCAACCCAGTG                         |
|                                                                      | LptD_Klebsiella  | LptD_Kleb_203f_NTT        | TACTTCCAATCCATGTTTAACTGGGTAGTGCCGATTTTCTACAGC               |
|                                                                      | LptD_Klebsiella  | LptD_Kleb_782r_NTT        | TATCCACCTTTACTGTTATTACAGACTAGACTGGTACGGCAGGATATTGC          |
|                                                                      | LptE_Klebsiella  | LptE_Kleb_20f             | CTCCTAACACCTCGGGTGGCATCTGCGTAGCAC                           |
|                                                                      | LptE_Klebsiella  | LptE_Kleb_196r            | CATCCATCATCAATGGTGATGGTGATGGTGGTGGCCAGCGTGGTG               |
|                                                                      | LptD_Pseudomonas | LptD_Pseud_301f_NTT       | TACTTCCAATCCATGCTGCGTGTAAAGATTTTCCGGTCTTCTATACC             |
|                                                                      | LptD_Pseudomonas | LptD_Pseud_924r_NTT       | TATCCACCTTTACTGTTATTACATCGCTGATCTTCGGGTTG                   |
|                                                                      | LptE_Pseudomonas | LptE_Pseud_21f            | CTCCTAACACCTCGGGCTTCCAACCTGCGTGGTCTGG                       |
|                                                                      | LptE_Pseudomonas | LptE_Pseud_207r           | CATCCATCATCAATGGTGATGGTGATGGTGGGCGGAAATCAATCGG              |
|                                                                      | In vivo cloning  | LptD_Escherichia          | pBAD24_LptD_NcoI_for2                                       |
| LptD_Escherichia                                                     |                  | pBAD24_LptD_HindIII_rev2  | ACTGTTAAGCTTTCACAAAGTGTGTTGATACGGCAGAATG                    |
| LptD_Escherichia                                                     |                  | LptD_Cm.F                 | ACCGTTTGTACGCGCAACGTTACCGATGATGGAACAATAACCTGTGACGGAAGATCACT |
| Mutagenesis                                                          | LptD_Escherichia | LptD_Cm.R                 | TAACCGCACTGCGGATTACGTGGTAAATCACAAAATCACATTACGCCCGCCCTGCCACT |
|                                                                      | LptD_Escherichia | pBAD_LptD_cthis10_for     | CCATCACCATCACCATCACCATGAAAGCTTGGCTGTTTTG                    |
|                                                                      | LptD_Escherichia | pBAD_LptD_cthis10_rev     | TGATGGTGGCTGCCACCGCCACCAAGTGTGTTGATACGGC                    |
|                                                                      | LptD_Escherichia | LptD_Ec_G227C             | GTGACAAACGTCGCTCTGTTCTTGATCCCGAAC                           |
|                                                                      | LptD_Escherichia | LptD_Ec_Y314C             | TTCACGTCGTTGGTATTCTGCTGGAACCACTCCG                          |
|                                                                      | LptD_Escherichia | LptD_Ec_Y347C             | GCTACTTCAATGATTTCGATAACAAGTGGCTTCCAGTACTG                   |
|                                                                      | LptD_Escherichia | LptD_Ec_T351C             | TCGATAACAAGTACGGTTCAGTTGTGACGGTACCGC                        |
|                                                                      | LptD_Escherichia | LptD_Ec_D714C             | CCAATGCTAACCAAGCAAGCCTGCTATGTTAGGTGTGCAAT                   |
|                                                                      | LptD_Escherichia | LptD_Ec_G718C             | GCAAGCCGACTATGTTATGTGTGAATACAGCTC                           |
|                                                                      | LptD_Escherichia | LptD_Ec_I777C             | AGAGATGCTGCGTTGCAACTGCTCGCGTATCAAAACACT                     |
|                                                                      | LptD_Escherichia | LptD_Ec_L758C_2           | ACGCAATCGGCTTTAACATCGAATGTCGCGGCTGAG                        |
|                                                                      | LptD_Escherichia | LptD_Ec_M772C_2           | GGTCTGGGTACGCAAGAGTGCCTGCGTTCGAACATTCTG                     |
|                                                                      | LptD_Escherichia | LptD_p231a_f              | TTTCTTGATCGCAACGCCAAG                                       |

|                  |                  |                                                          |
|------------------|------------------|----------------------------------------------------------|
| LptD_Escherichia | LptD_p231a_r     | CCAGAGCGACGTTTGTAC                                       |
| LptD_Escherichia | LptD_p246a_f     | GTTCTACCTGGCATATTACTG                                    |
| LptD_Escherichia | LptD_p246a_r     | TCAAAGTAGTTGGTGGTG                                       |
| LptD_Escherichia | LptD_p231a_multi | GCGATGTTCCAGTAATATGCCAGGTAGAACTCAAAGTAG                  |
| LptD_Escherichia | LptD_p246a_multi | CTCTGGTTTCTTGATCGCGAACGCCAAGTACAC                        |
| LptD_Escherichia | LptD_r774e_f     | AGAGATGCTGGAATCGAACATTCTGCCG                             |
| LptD_Escherichia | LptD_r774e_r     | TGCGTACCCAGACCGTAG                                       |
| LptD_Escherichia | LptD_r310e_f     | CAGTTCACGTGAATGGTTATTCTACTGG                             |
| LptD_Escherichia | LptD_r310e_r     | TCATCGTTCGGGTGTTTCATC                                    |
| LptD_Escherichia | LptD_e273q_e275q | TGGCAACATCATGTGGCAGAACCCAGTCCGCTACCTCTCCC                |
| LptD_Escherichia | LptD_e288q_d290n | GGGCGCTGGCTTGATGCAGCTGAATATCTGCCTTCAGA                   |
| LptD_Escherichia | LptD_d330n       | GTGGCGTTTCAACGTCAACTACACCAAGGTACG                        |
| LptD_Escherichia | LptD_d342n_d344n | GCGATCCTAGTACTTCAATAATTTCAATAACAAGTACGGTTCAGT            |
| LptD_Escherichia | LptD_d352n       | ATAACAAGTACGGTTCCAGTACTAACGGCTACGCCAA                    |
| LptD_Escherichia | LptD_d749n       | GATAACGATAAACAACATGCGGTATATAACAACGCAATCGGC               |
| LptD_Escherichia | LptD_e273k_e275k | GTGGCAACATCATGTGGGAAGAACAATTCGCTACCTCTCC                 |
| LptD_Escherichia | LptD_e288k_d290k | GCGGGCGCTGGCTTGATGAACTGAAGTATCTGCCTTCAGATAAA             |
| LptD_Escherichia | LptD_d330k       | GTGGCGTTTCAACGTCAAGTACACCAAGGTACGCG                      |
| LptD_Escherichia | LptD_d342k_d344k | GGTCAGCGATCCTAGTACTTCAATAAGTCAAGAACAAAGTACGGTTCAGTACTGAC |
| LptD_Escherichia | LptD_d352k       | CGATAACAAGTACGGTTCAGTACTAAGGGCTACGCAACGC                 |
| LptD_Escherichia | LptD_d749k       | GGGATAACGATAAACAACATGCGGTATATAAGAACGCAATCGGCTTTA         |

For purification, cells were resuspended in lysis buffer (50 mM Tris-HCl pH 7.5, 200 mM NaCl, 1 mM MgCl<sub>2</sub>, 10 µg/ml DNaseI, 100 µg/ml 4-(2-aminoethyl)benzenesulphonyl fluoride (AEBSF)) and lysed by three passages through an Emulsiflex C3 (Avestin) homogenizer at 4°C. The lysate was centrifuged at 10,000g for 10 min to remove unlysed cells and the supernatant was incubated with 2% (v/v) Triton X-100 for 30 min at 4°C. Membranes were isolated from the lysate by centrifugation at 234,000g for 60 min at 4°C. The pellet was resuspended in buffer containing 50 mM Tris-HCl pH 7.5, 200 mM NaCl, and 20 mM imidazole and solubilized by constant stirring in 5% (w/v) Elugent (Millipore Merck) for 16 h at 4°C. Insoluble material was removed by centrifugation at 370,000g for 60 min at 4°C. The supernatant was filtered and applied to a 15-ml Ni-NTA column (Qiagen) equilibrated in 50 mM K<sub>2</sub>HPO<sub>4</sub> pH 7.5, 200 mM NaCl, 10% (v/v) glycerol, 20 mM imidazole, and 0.1% (w/v) dodecyl maltoside (DDM) (Anatrace). Protein was eluted with 250 mM imidazole and peak fractions were pooled and dialysed against 25 mM Tris-HCl pH 8.0 containing 0.6 mM EDTA pH 8.0 for 16 h at 4°C. The sample was applied to a 10 mL Q-Sepharose column (GE Healthcare) equilibrated with 25 mM Tris HCl pH 8.0, 0.6 mM EDTA, and 0.1% DDM and eluted with a linear gradient of 0-0.6 M NaCl. Peak fractions were then concentrated and applied to a S-300HR Sephacryl size exclusion column (GE Healthcare) equilibrated in 20 mM Tris-HCl pH 7.5, 200 mM NaCl, and 0.8% C<sub>8</sub>E<sub>4</sub>.

### ***ΔlptD* strain and Phage lysate generation**

First, pBAD24\_LptD\_WT was electroporated into *E. coli* strain NM1100 containing a chromosomal lambda Red system (Bougdoor et al., 2008) and plated on LB agar containing 50 µg/ml ampicillin. After O/N incubation at 32°C, a single transformant was grown in LB broth containing 50 µg/ml ampicillin at 32°C to an OD<sub>600</sub> of 0.6. These cultures were then placed in a shaking 42°C water bath for 15 min to induce lambda gene expression and then immediately cooled in an ice-water slurry. Cells were pelleted at 4°C and washed three times with ice-cold ultrapure water. Final pellets were resuspended in 1/100 of the original culture volume in ice-cold ultrapure water containing 10% (v/v) glycerol and either used immediately or frozen. In parallel, the chloramphenicol resistance cassette from pCAT19 (Fuqua, 1992) was PCR amplified using primers lptD\_Cm.F and lptD\_Cm.R. These primers contain 5' overhangs incorporating 40 bp of complementary sequence upstream and downstream of the *lptD* gene. The PCR product was electroporated into NM100 containing pBAD24\_LptD\_WT prepared as described above. After re-suspension in 1 ml of LB broth and recovery at 37°C for 1 hour, cells were spread on LB plates containing 50 µg/ml ampicillin, 10 µg/ml chloramphenicol, and 1% (w/v) arabinose. The plates were incubated O/N at 37°C to select for colonies carrying the chromosomal *lptD* deletion and pBAD24\_LptD\_WT. The chromosomal insertion of the chloramphenicol cassette at the *lptD* locus was verified by PCR.

The *ΔlptD* cells were grown at 37°C in LB medium containing 50 µg/ml ampicillin, 1% (w/v) arabinose, 0.01 M MgSO<sub>4</sub>, and 0.005 M CaCl<sub>2</sub>. At an OD<sub>600</sub> of ~ 0.1-0.2 P1vir phage was added and the culture was grown 4 h at

37°C or until complete lysis was observed. A couple of drops of chloroform were added to lyse any remaining cells and the culture was centrifuged to remove debris. The supernatant was collected, two additional drops of chloroform were added, and the sample was stored at 4°C.

### ***LptD localization assay***

Glycerol stocks of MG1655 *E. coli* cells containing pBAD24\_LptD\_WTcHis and mutant variants were inoculated into 500 mL TB medium containing 50 µg/ml ampicillin and 0.2% (w/v) arabinose. Cultures were grown overnight at 37°C and harvested. Cell pellets were resuspended in 40 mL of buffer containing 50 mM Tris HCl pH 7.5, 200 mM NaCl, 0.4 mg DNase I, and 4 mg AEBSF. The cell suspension was lysed via three passes through an Emulsiflex C3 (Avestin) homogenizer at 4°C. The lysate was centrifuged (7,000g, 4°C, 10 min) to remove unbroken cells and the supernatant was centrifuged at 234,000g for 1h at 4°C to collect membranes. The membrane pellet was resuspended in 15 mL of 50 mM Tris HCl pH 7.5 and 200 mM NaCl. Samples were mixed 1:1 with 4X LDS buffer (Invitrogen) containing 5% (v/v) β-mercaptoethanol, heated at 99°C for 20 min, and then centrifuged at 20,000g for 20 min. Aliquots (5 µl) of each sample were run on 4-12% Bis-Tris NuPAGE gels (Invitrogen) and transferred to PVDF membranes for immunoblotting. The membranes were blocked for 2 h in PBS containing 2% (w/v) BSA and 0.1% (v/v) Tween. An antihistidine HRP conjugated antibody (Sigma) was used to detect the C-terminal 10X histidine tag present in all of the LptD constructs. The blots were developed using SIGMAFAST 3,3'-diaminobenzidine solution (Sigma).



| Protein                       | PaLptDE (5IVA)      |                     | PaLptDE + C-terminus (model) |                     | KpLptDE(5IV8/5IV9) |                     | YpLptDE (5IXM)     |                     | StLptDE (4N4R)     |                     | SfLptDE (4Q35)      |                     | EcLptDE (4RHB)     |                    |
|-------------------------------|---------------------|---------------------|------------------------------|---------------------|--------------------|---------------------|--------------------|---------------------|--------------------|---------------------|---------------------|---------------------|--------------------|--------------------|
| Monomer                       | LptE (B)            | LptD (A)            | LptE (B)                     | LptD (A)            | LptE (B)           | LptD (A)            | LptE (H)           | LptD (G)            | LptE (B)           | LptD (A)            | LptE (B)            | LptD (A)            | LptE (B)           | LptD (A)           |
| <b>Nr of atoms</b>            |                     |                     |                              |                     |                    |                     |                    |                     |                    |                     |                     |                     |                    |                    |
| in interface                  | 292<br>(24.5%)      | 368<br>(7.7%)       | 313<br>(26.3%)               | 386<br>(7.9%)       | 289<br>(25.8%)     | 364<br>(8.4%)       | 292<br>(26.3%)     | 365<br>(8.6%)       | 315<br>(26.8%)     | 392<br>(9.0%)       | 300<br>(25.4%)      | 378 (6.2%)          | 307<br>(26.0)      | 396<br>(8.7)       |
| on the surface                | 815<br>(68.4%)      | 3058<br>(64.3%)     | 813<br>(68.2%)               | 3125<br>(63.7%)     | 751<br>(67.1%)     | 2823<br>(65.3%)     | 771<br>(69.3%)     | 2795<br>(66.0%)     | 799<br>(67.9%)     | 2830<br>(64.8%)     | 780<br>(66.0%)      | 3961<br>(64.7%)     | 790<br>(66.9)      | 2888<br>(63.3)     |
| Total                         | 1192<br>(100.0%)    | 4755<br>(100.0%)    | 1192<br>(100.0%)             | 4909<br>(100.0%)    | 1119<br>(100.0%)   | 4324<br>(100.0%)    | 1112<br>(100.0%)   | 4237<br>(100.0%)    | 1176<br>(100.0%)   | 4370<br>(100.0%)    | 1181<br>(100.0%)    | 6126<br>(100.0%)    | 1181<br>(100.0)    | 4564<br>(100.0)    |
| <b>Nr of residues</b>         |                     |                     |                              |                     |                    |                     |                    |                     |                    |                     |                     |                     |                    |                    |
| in interface                  | 69<br>(45.4%)       | 105<br>(18.1%)      | 72<br>(47.4%)                | 111<br>(18.6%)      | 70<br>(47.9%)      | 116<br>(21.5%)      | 70<br>(49.6%)      | 111<br>(21.0%)      | 70<br>(46.4%)      | 114<br>(21.4%)      | 71<br>(47.3%)       | 117<br>(15.4%)      | 72<br>(48.0)       | 118<br>(21.2)      |
| on the surface                | 151<br>(99.3%)      | 573<br>(99.0%)      | 149<br>(99.0%)               | 590<br>(98.8%)      | 140<br>(95.9%)     | 534<br>(98.9%)      | 141<br>(100.0%)    | 522<br>(98.9%)      | 142<br>(94.0%)     | 530<br>(99.6%)      | 145<br>(96.7%)      | 750<br>(98.9%)      | 145<br>(96.7)      | 546<br>(98.2)      |
| Total                         | 152<br>(100.0%)     | 579<br>(100.0%)     | 152<br>(100.0%)              | 597<br>(100.0%)     | 146<br>(100.0%)    | 540<br>(100.0%)     | 141<br>(100.0%)    | 528<br>(100.0%)     | 151<br>(100.0%)    | 532<br>(100.0%)     | 150<br>(100.0%)     | 758<br>(100.0%)     | 150<br>(100.0)     | 556<br>(100.0)     |
| Accessible Surface area       |                     |                     |                              |                     |                    |                     |                    |                     |                    |                     |                     |                     |                    |                    |
| Buried (sqÅ)                  | 2860.3<br>(28.0%)   | 2518.5<br>(8.1%)    | 3385.0<br>(33.1%)            | 3079.0<br>(9.9%)    | 3274.8<br>(34.9%)  | 3038.0<br>(10.4%)   | 3309.2<br>(34.7%)  | 3024.3<br>(10.5%)   | 3441.7<br>(34.7%)  | 3168.2<br>(11.0%)   | 3477.6<br>(34.8%)   | 3085.2<br>(7.8%)    | 3527.5<br>(35.2)   | 3168.5<br>(10.7)   |
| Total (sqÅ)                   | 10220.2<br>(100.0%) | 30932.1<br>(100.0%) | 10219.0<br>(100.0%)          | 31236.5<br>(100.0%) | 9384.6<br>(100.0%) | 29155.5<br>(100.0%) | 9532.1<br>(100.0%) | 28834.1<br>(100.0%) | 9925.7<br>(100.0%) | 28857.6<br>(100.0%) | 99986.0<br>(100.0%) | 39325.5<br>(100.0%) | 10025.2<br>(100.0) | 29500.9<br>(100.0) |
| Solvation E (kcal/mol)        | -113.6              | -423.4              | -112.9                       | -436.4              | -122.0             | -362.0              | -106.0             | -382.1              | -109.0             | -378.2              | -131.7              | -560.1              | -128.8             | -386.1             |
| H-bonds                       | 35                  |                     | 29                           |                     | 29                 |                     | 29                 |                     | 46                 |                     | 40                  |                     | 31                 |                    |
| Salt bridges                  | 17                  |                     | 21                           |                     | 21                 |                     | 22                 |                     | 42                 |                     | 24                  |                     | 19                 |                    |
|                               |                     |                     |                              |                     | core               | full                |                    |                     |                    |                     | core                | full                |                    |                    |
| *Molec Vol Å <sup>3</sup>     | 93,170              |                     | 95,750                       |                     | 88,090             | 114,700             | 88,770             |                     | 87,750             |                     | 90,610              | 113,800             | 90,010             |                    |
| *Molec Surf Å <sup>2</sup>    | 36,310              |                     | 36,650                       |                     | 32,500             | 43,830              | 33,460             |                     | 32,900             |                     | 34,280              | 43,650              | 33,410             |                    |
| **Lumen Vol Å <sup>3</sup>    | -                   |                     | 9,695                        |                     | 8,972              |                     | 7,710              |                     | 8,030              |                     | 9,380               |                     | 8,290              |                    |
| **Surface Area Å <sup>2</sup> | -                   |                     | 4,096                        |                     | 4,241              |                     | 3,964              |                     | 4,011              |                     | 3,967               |                     | 3,385              |                    |

**Table S2** (related to Figure 2): **Surface area and volume analysis of known LptDE core structures.** The analysis was carried out with QtPISA (E.B. Krissinel and K. Henrick (2007) Inference of macromolecular assemblies from crystalline state, J.Mol.Biol. 372 774-797).

**\*Molecular volume and surface area of full-length and core complexes.** Analysis performed with UCSF Chimera (UCSF Chimera – a visualization system for exploratory research and analysis. (2004) Pettersen EF, Goddard TD, Huang CC, Couch GS, Greenblatt DM, Meng, EC, Ferrin TE. J Comput Chem. 13, 1605-12).

**\*\*Luminal volume and surface area of known LptDE core complexes.** The luminal cavities were identified and their volumes calculated with the Voss Volume Voxelator webserver (Voss, NR, Gerstein, M (2010) 3V: cavity, channel and cleft volume calculator and extractor).

## Supplemental Experimental Procedures

### *Cloning, expression and purification of LptDE*

Primer names and sequences used for LIC cloning are listed in the Table below. The modified pET9 vector, into which LptD was inserted, contained an N-terminal PelB signal sequence, a 10X His tag, a TEV site, and LIC cloning sites. The modified pCDF-1b vector for LptE expression contained the PelB signal sequence, LIC cloning sites, and a C-terminal 6X His tag. LptD and LptE for each species were co-expressed in BL21 (DE3) cells in TB media supplemented with 50µg/ml kanamycin and 25µg/ml streptomycin to stationary phase (3-4 days). The cells were grown at 21°C without IPTG induction.

To make the pBAD24\_LptD\_WT plasmid, *E. coli* LptD (residues 1 – 784) was cloned into pBAD24 using primers pBAD24\_LptD\_NcoI\_for2 and pBAD24\_LptD\_HindIII\_rev2. A C-terminal 10X histidine tag was subsequently inserted into this vector using primers pBAD\_LptD\_chis10\_for and pBAD\_LptD\_chis10\_rev to create pBAD24\_LptD\_WTcHis. This vector and its mutant derivatives were used in the LptD knock-out and localization assays.

| Primer sequences and names/numbers for constructs used in this study |                     |                                                   |                                                              |
|----------------------------------------------------------------------|---------------------|---------------------------------------------------|--------------------------------------------------------------|
| Function:                                                            | Gene:               | Name:                                             | Sequence (5'-3'):                                            |
| Expression                                                           | LptD_Yersinia       | LptD_Yersinia225_pET9_for                         | TACTTCCAATCCATGTCTGGATTCTGATTCCGAACGCC                       |
|                                                                      | LptD_Yersinia       | LptD_Yersinia_pET9_rev                            | TATCCACCTTTACTGTTATTAGAATGCGCTCTGATACGGCAG                   |
|                                                                      | LptE_Yersinia       | LptE_Yersinia_pCDF-SS_for                         | CTCCTAACACCTCGGGCTTTAACCTGCGTGGCAC                           |
|                                                                      | LptE_Yersinia       | LptE_Yersinia_pCDF-SS_rev                         | CATCCATCATCAATGGTGATGGTGATGGTGTGGCCGAGGTTGAGACC              |
|                                                                      | LptD_Klebsiella     | LptD_Kleb_25f_NTT                                 | TACTTCCAATCCATGGCCGATCTGGCAACCCAGTG                          |
|                                                                      | LptD_Klebsiella     | LptD_Kleb_203f_NTT                                | TACTTCCAATCCATGTTTAAACTGGGTAGTGTGCCGATTTCCTACAGC             |
|                                                                      | LptD_Klebsiella     | LptD_Kleb_782r_NTT                                | TATCCACCTTTACTGTTATTACAGACTAGACTGGTACGGCAGGATATTGC           |
|                                                                      | LptE_Klebsiella     | LptE_Kleb_20f                                     | CTCCTAACACCTCGGGTTGGCATCTGCGTAGCAC                           |
|                                                                      | LptE_Klebsiella     | LptE_Kleb_196r                                    | CATCCATCATCAATGGTGATGGTGATGGTGTGGCCAGCGTGGTG                 |
|                                                                      | LptD_Pseudomonas    | LptD_Pseud_301f_NTT                               | TACTTCCAATCCATGTCTGGTGTAAAGATTTTCCGGTCTTCTATACC              |
| LptD_Pseudomonas                                                     | LptD_Pseud_924r_NTT | TATCCACCTTTACTGTTATTACATCGCTGATCTTCGGGTTG         |                                                              |
| LptE_Pseudomonas                                                     | LptE_Pseud_21f      | CTCCTAACACCTCGGGCTTCCAAGTGGTGGTCTGG               |                                                              |
| LptE_Pseudomonas                                                     | LptE_Pseud_207r     | CATCCATCATCAATGGTGATGGTGATGGTGGGGGTGGAAATTCAATCGG |                                                              |
| In vivo cloning                                                      | LptD_Escherichia    | pBAD24_LptD_NcoI_for2                             | TCGTTACCATTGGATGAAAAACGATATCCCACTCTCTCTGG                    |
|                                                                      | LptD_Escherichia    | pBAD24_LptD_HindIII_rev2                          | ACTGTTAAGCTTTCACAAAGTGTTTGATACGGCAGAAATG                     |
|                                                                      | LptD_Escherichia    | lptD_Cm.F                                         | ACCGTTTGTACGGCGCAACGTTACCGATGATGGAACAATAACCTGTGACGGAAGATCACT |
|                                                                      | LptD_Escherichia    | lptD_Cm.R                                         | TAACCGCACTGCGGATTACGGTAAATCAACAAATCACATTACGCCCGCCTGCCACT     |
| Mutagenesis                                                          | LptD_Escherichia    | pBAD_LptD_cthis10_for                             | CCATCACCATCACCATCACCATTGAAAGCTTGGCTGTTTTG                    |
|                                                                      | LptD_Escherichia    | pBAD_LptD_cthis10_rev                             | TGATGGTGGCTGCCACCGCCACCAAAGTGTTTTGATACGGC                    |
|                                                                      | LptD_Escherichia    | LptD_Ec_G227C                                     | GTGACAAACGTCGCTCTTGTCTTCTGATCCCGAAC                          |
|                                                                      | LptD_Escherichia    | LptD_Ec_Y314C                                     | TTACGTCGTGGTTATTCTGTGGAACCACTCGG                             |
|                                                                      | LptD_Escherichia    | LptD_Ec_Y347C                                     | GCTACTTCAATGATTTGATAACAAGTGGGTTCCAGTACTG                     |
|                                                                      | LptD_Escherichia    | LptD_Ec_T351C                                     | TCGATAACAAGTACGGTTCAGTGTGACGGCTACGC                          |
|                                                                      | LptD_Escherichia    | LptD_Ec_D714C                                     | CCAATGCTAACAAAGCAAGCTGCTATGTTAGGTGTGCAAT                     |
|                                                                      | LptD_Escherichia    | LptD_Ec_G718C                                     | GCAAGCGACTCTATGTTATGTGTGCAATACAGCTC                          |
|                                                                      | LptD_Escherichia    | LptD_Ec_I777C                                     | AGAGATGTCGGTTCGAACTGTCTGCGGTATCAAAACACT                      |
|                                                                      | LptD_Escherichia    | LptD_Ec_L758C_2                                   | ACGCAATCGGCTTTAAACATCGAATGTGCGGCGCTGAG                       |
|                                                                      | LptD_Escherichia    | LptD_Ec_M772C_2                                   | GGTCTGGGTACGCAAGAGTGCCTGCGTTCGAACATTCTG                      |
|                                                                      | LptD_Escherichia    | LptD_p231a_f                                      | TTTCTTGATCGCGAACGCCAAG                                       |
|                                                                      | LptD_Escherichia    | LptD_p231a_r                                      | CCAGAGCGACGTTGTGAC                                           |
|                                                                      | LptD_Escherichia    | LptD_p246a_f                                      | GTTCTACCTGGCATATTACTG                                        |
|                                                                      | LptD_Escherichia    | LptD_p246a_r                                      | TCAAAGTAGTTGGTGGTG                                           |
|                                                                      | LptD_Escherichia    | LptD_p231a_multi                                  | GCGATGTTCCAGTAATATGCCAGGTAGAAGTCAAAGTAG                      |
|                                                                      | LptD_Escherichia    | LptD_p246a_multi                                  | CTCTGGTTTCTTGTGTCGGAAGCCAAAGTACAC                            |
|                                                                      | LptD_Escherichia    | LptD_r774e_f                                      | AGAGATGCTGGAATCGAACAATTCTGCGG                                |
|                                                                      | LptD_Escherichia    | LptD_r774e_r                                      | TGCGTACCCAGACCGTATG                                          |
|                                                                      | LptD_Escherichia    | LptD_r310e_f                                      | CAGTTCACGTGAATGGTTATTCTACTGG                                 |
|                                                                      | LptD_Escherichia    | LptD_r310e_r                                      | TCATCGTTCGGGTGTTCAATC                                        |
|                                                                      | LptD_Escherichia    | LptD_e273q_e275q                                  | TGGCAACATCATGTGGCAGAACCAGTTCCGCTACTCTCC                      |
|                                                                      | LptD_Escherichia    | LptD_e288q_d290n                                  | GGGCGTGGCTTGATGACGCTGAACTATCTGCCTTCAGA                       |
|                                                                      | LptD_Escherichia    | LptD_d330n                                        | GTGGCGTTTCAACGCTCAACTACCAAGGTCAG                             |
|                                                                      | LptD_Escherichia    | LptD_d342n_d344n                                  | GCGATCCTAGCTACTTCAATAATTTCAATAACAAGTACGGTTCAGT               |
|                                                                      | LptD_Escherichia    | LptD_d352n                                        | ATAACAAGTACGGTTCAGTACTAACGGCTACGCCAA                         |
|                                                                      | LptD_Escherichia    | LptD_d749n                                        | GATAACGATAAACAACTGCGGTATATAACAACGCAATCGGC                    |

|  |                  |                  |                                                          |
|--|------------------|------------------|----------------------------------------------------------|
|  | LptD_Escherichia | LptD_e273k_e275k | GTGGCAACATCATGTGGAAGAACAAATTCGCTACCTCTCC                 |
|  | LptD_Escherichia | LptD_e288k_d290k | GCGGGCGCTGGCTTGATGAAACTGAAGTATCTGCCTCAGATAAA             |
|  | LptD_Escherichia | LptD_d330k       | GTGGCGTTTCAACGTCAAGTACACCAAGGTCAGCG                      |
|  | LptD_Escherichia | LptD_d342k_d344k | GGTCAGCGATCCTAGTACTTCAATAAGTTCAAGAACAAGTACGGTCCAGTACTGAC |
|  | LptD_Escherichia | LptD_d352k       | CGATAACAAGTACGGTTCAGTACTAAGGGCTACGCAACGC                 |
|  | LptD_Escherichia | LptD_d749k       | GGGATAACGATAAACAACATGCGGTATATAAGAACGCAATCGGCTTTA         |

For purification, cells were resuspended in lysis buffer (50 mM Tris-HCl pH 7.5, 200 mM NaCl, 1 mM MgCl<sub>2</sub>, 10 µg/ml DNaseI, 100 µg/ml 4-(2-aminoethyl)benzenesulphonyl fluoride (AEBSF)) and lysed by three passages through an Emulsiflex C3 (Avestin) homogenizer at 4°C. The lysate was centrifuged at 10,000g for 10 min to remove unlysed cells and the supernatant was incubated with 2% (v/v) Triton X-100 for 30 min at 4°C. Membranes were isolated from the lysate by centrifugation at 234,000g for 60 min at 4°C. The pellet was resuspended in buffer containing 50 mM Tris-HCl pH 7.5, 200 mM NaCl, and 20 mM imidazole and solubilized by constant stirring in 5% (w/v) Elugent (Millipore Merck) for 16 h at 4°C. Insoluble material was removed by centrifugation at 370,000g for 60 min at 4°C. The supernatant was filtered and applied to a 15-ml Ni-NTA column (Qiagen) equilibrated in 50 mM K<sub>2</sub>HPO<sub>4</sub> pH 7.5, 200 mM NaCl, 10% (v/v) glycerol, 20 mM imidazole, and 0.1% (w/v) dodecyl maltoside (DDM) (Anatrace). Protein was eluted with 250 mM imidazole and peak fractions were pooled and dialysed against 25 mM Tris-HCl pH 8.0 containing 0.6 mM EDTA pH 8.0 for 16 h at 4°C. The sample was applied to a 10 mL Q-Sepharose column (GE Healthcare) equilibrated with 25 mM Tris HCl pH 8.0, 0.6 mM EDTA, and 0.1% DDM and eluted with a linear gradient of 0-0.6 M NaCl. Peak fractions were then concentrated and applied to a S-300HR Sephacryl size exclusion column (GE Healthcare) equilibrated in 20 mM Tris-HCl pH 7.5, 200 mM NaCl, and 0.8% C<sub>8</sub>E<sub>4</sub>.

### ***ΔlptD strain and Phage lysate generation***

First, pBAD24\_LptD\_WT was electroporated into *E. coli* strain NM1100 containing a chromosomal lambda Red system (Bougourd et al., 2008) and plated on LB agar containing 50 µg/ml ampicillin. After O/N incubation at 32°C, a single transformant was grown in LB broth containing 50 µg/ml ampicillin at 32°C to an OD<sub>600</sub> of 0.6. These cultures were then placed in a shaking 42°C water bath for 15 min to induce lambda gene expression and then immediately cooled in an ice-water slurry. Cells were pelleted at 4°C and washed three times with ice-cold ultrapure water. Final pellets were resuspended in 1/100 of the original culture volume in ice-cold ultrapure water containing 10% (v/v) glycerol and either used immediately or frozen. In parallel, the chloramphenicol resistance cassette from pCAT19 (Fuqua, 1992) was PCR amplified using primers lptD\_Cm.F and lptD\_Cm.R. These primers contain 5' overhangs incorporating 40 bp of complementary sequence upstream and downstream of the *lptD* gene. The PCR product was electroporated into NM100 containing pBAD24\_LptD\_WT prepared as described above. After re-suspension in 1 ml of LB broth and recovery at 37°C for 1 hour, cells were spread on LB plates containing 50 µg/ml ampicillin, 10 µg/ml chloramphenicol, and 1% (w/v) arabinose. The plates were incubated O/N at 37°C to select for colonies carrying the chromosomal *lptD* deletion and pBAD24\_LptD\_WT. The chromosomal insertion of the chloramphenicol cassette at the *lptD* locus was verified by PCR.

The  $\Delta lptD$  cells were grown at 37°C in LB medium containing 50 µg/ml ampicillin, 1% (w/v) arabinose, 0.01 M MgSO<sub>4</sub>, and 0.005 M CaCl<sub>2</sub>. At an OD<sub>600</sub> of ~ 0.1-0.2 P1vir phage was added and the culture was grown 4 h at 37°C or until complete lysis was observed. A couple of drops of chloroform were added to lyse any remaining cells and the culture was centrifuged to remove debris. The supernatant was collected, two additional drops of chloroform were added, and the sample was stored at 4°C.

### ***LptD localization assay***

Glycerol stocks of MG1655 *E. coli* cells containing pBAD24\_LptD\_WT<sub>His</sub> and mutant variants were inoculated into 500 mL TB medium containing 50 µg/ml ampicillin and 0.2% (w/v) arabinose. Cultures were grown overnight at 37°C and harvested. Cell pellets were resuspended in 40 mL of buffer containing 50 mM Tris HCl pH 7.5, 200 mM NaCl, 0.4 mg DNase I, and 4 mg AEBSF. The cell suspension was lysed via three passes through an Emulsiflex C3 (Avestin) homogenizer at 4°C. The lysate was centrifuged (7,000g, 4°C, 10 min) to remove unbroken cells and the

supernatant was centrifuged at 234,000g for 1h at 4°C to collect membranes. The membrane pellet was resuspended in 15 mL of 50 mM Tris HCl pH 7.5 and 200 mM NaCl. Samples were mixed 1:1 with 4X LDS buffer (Invitrogen) containing 5% (v/v) β-mercaptoethanol, heated at 99°C for 20 min, and then centrifuged at 20,000g for 20 min. Aliquots (5 μl) of each sample were run on 4-12% Bis-Tris NuPAGE gels (Invitrogen) and transferred to PVDF membranes for immunoblotting. The membranes were blocked for 2 h in PBS containing 2% (w/v) BSA and 0.1% (v/v) Tween. An antihistidine HRP conjugated antibody (Sigma) was used to detect the C-terminal 10X histidine tag present in all of the LptD constructs. The blots were developed using SIGMAFAST 3,3'-diaminobenzidine solution (Sigma).
