# Supplementary material
Source: PubMed Central journal article supplement (PMC4899211)
Supplement: NIHMS783998-supplement-2.pdf [file NIHMS783998-supplement-2.pdf]

# Structure

## Structural and Functional Characterization of the LPS Transporter LptDE from Gram-Negative Pathogens

### Graphical Abstract

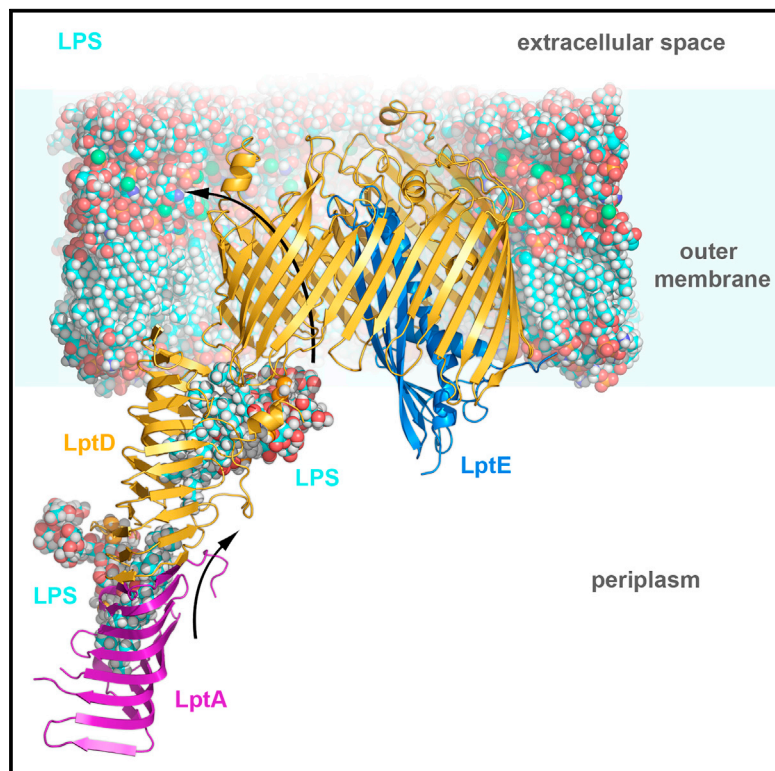

### Authors

Istvan Botos, Nadim Majdalani, Stephen J. Mayclin, ..., Travis J. Barnard, James C. Gumbart, Susan K. Buchanan

### Correspondence

skbuchan@helix.nih.gov

### In Brief

Crystal structures of the lipopolysaccharide (LPS) transporter LptDE from three bacterial pathogens reveal new features of the LPS transport mechanism. The N-terminal domain of LptD, which accepts transported LPS from the periplasmic protein LptA, undergoes a large rotation that may facilitate assembly of the LptCAD scaffold.

### Highlights

- LptD forms a 26-strand bilobed  $\beta$  barrel with LptE inserted inside
- The N-terminal domain of *Kp*LptDE rotates  $21^\circ$  compared with *Sf*LptDE
- Pro residues in  $\beta 1$  and  $\beta 2$  play critical roles in the lateral opening of the barrel
- All LptDE structures have a negatively charged lumen that may aid LPS insertion

### Accession Numbers

5IXM  
5IV8  
5IVA  
5IV9

# Structural and Functional Characterization of the LPS Transporter LptDE from Gram-Negative Pathogens

Istvan Botos,<sup>1,5</sup> Nadim Majdalani,<sup>2,5</sup> Stephen J. Mayclin,<sup>1,5</sup> Jennifer Gehret McCarthy,<sup>1,5</sup> Karl Lundquist,<sup>3</sup> Damian Wojtowicz,<sup>4</sup> Travis J. Barnard,<sup>1</sup> James C. Gumbart,<sup>3</sup> and Susan K. Buchanan<sup>1,\*</sup>

<sup>1</sup>Laboratory of Molecular Biology, National Institute of Diabetes and Digestive and Kidney Diseases, National Institutes of Health, Bethesda, MD 20892, USA

<sup>2</sup>Laboratory of Molecular Biology, National Cancer Institute, National Institutes of Health, Bethesda, MD 20892, USA

<sup>3</sup>School of Physics, Georgia Institute of Technology, Atlanta, GA 30332, USA

<sup>4</sup>National Center for Biotechnology Information, National Institutes of Health, Bethesda, MD 20892, USA

<sup>5</sup>Co-first author

\*Correspondence: [skbuchan@helix.nih.gov](mailto:skbuchan@helix.nih.gov)  
<http://dx.doi.org/10.1016/j.str.2016.03.026>

## SUMMARY

Incorporation of lipopolysaccharide (LPS) into the outer membrane of Gram-negative bacteria is essential for viability, and is accomplished by a two-protein complex called LptDE. We solved crystal structures of the core LptDE complexes from *Yersinia pestis*, *Klebsiella pneumoniae*, *Pseudomonas aeruginosa*, and a full-length structure of the *K. pneumoniae* LptDE complex. Our structures adopt the same plug and 26-strand  $\beta$ -barrel architecture found recently for the *Shigella flexneri* and *Salmonella typhimurium* LptDE structures, illustrating a conserved fold across the family. A comparison of the only two full-length structures, SflLptDE and our KpLptDE, reveals a 21° rotation of the LptD N-terminal domain that may impart flexibility on the trans-envelope LptCAD scaffold. Utilizing mutagenesis coupled to an in vivo functional assay and molecular dynamics simulations, we demonstrate the critical role of Pro231 and Pro246 in the function of the LptD lateral gate that allows partitioning of LPS into the outer membrane.

## INTRODUCTION

Cell-envelope structure is a major contributor to virulence in Gram-negative bacteria (Whitfield and Trent, 2014). The asymmetry of the outer membrane, composed of phospholipids in the inner leaflet and lipopolysaccharide (LPS) in the outer leaflet (Ruiz et al., 2006), shields the bacterium from harsh environments and protects against influx of harmful compounds. The barrier function results from the exclusion of polar molecules by the lipid bilayer and the exclusion of non-polar molecules by the packed polysaccharide domains of LPS. The amphipathic nature of LPS, which enables its essential cellular function, also makes its transport across the membrane challenging (Ruiz et al., 2009). From the site of synthesis at the inner membrane

(Raetz and Whitfield, 2002; Simpson et al., 2015) to its final destination in the outer leaflet of the outer membrane (May et al., 2015; Raetz et al., 2007), LPS must pass through the aqueous periplasm and the lipid bilayer of the outer membrane.

Transport of LPS across these diverse environments is carried out by seven proteins comprising the LPS transport system, LptABCDEFG (Villa et al., 2013) (Figure 1A). Members of this system reside in each cellular compartment, from the cytoplasm to the outer membrane, and all are essential (Chng et al., 2010a) (with the single known exception being *Neisseria*, which can survive without LPS). This makes the components of the Lpt system promising targets for the development of new antibiotics. The ABC transporter consisting of LptBFG utilizes energy from the ATP-hydrolysis activity of LptB to extract LPS from the inner membrane (Narita and Tokuda, 2009) and transfer it to LptC (Sperandeo et al., 2011). The soluble, periplasmic protein LptA, which shares a common fold with LptC (Tran et al., 2010) and the N-terminal domain of LptD (Qiao et al., 2014), has been shown to form a head-to-tail oligomer (Suits et al., 2008) with a V-shaped hydrophobic groove continuous from one monomer to the next. Previous data demonstrated connectivity between LptA and LptD (Bowyer et al., 2011) and LptA and LptC (Sperandeo et al., 2011), respectively. This led to the hypothesis of a physical, trans-periplasmic connection between the inner and outer membranes that could allow transport of LPS with its lipid A domain moving along the hydrophobic groove. Recent data suggest that LPS is driven across this scaffold in a continuous stream utilizing energy derived from the ABC transporter, LptBFG (Okuda et al., 2012; Sherman et al., 2014).

Once LPS has transited the periplasm, it is inserted into the outer leaflet of the outer membrane by LptDE (Chng et al., 2010b; Ruiz et al., 2008). LptDE is a two-protein complex consisting of an integral (LptD) and a lipid anchored (LptE) membrane protein. Experiments in recent years have greatly advanced our understanding of how LptDE functions. Maturation of LptDE involves a complex cycle of disulfide bond rearrangement in LptD (Chng et al., 2012). The availability of the first high-resolution structures of LptDE shed light on the LPS insertion mechanism, including identification of a putative lateral gate through which LPS can be inserted into the outer membrane

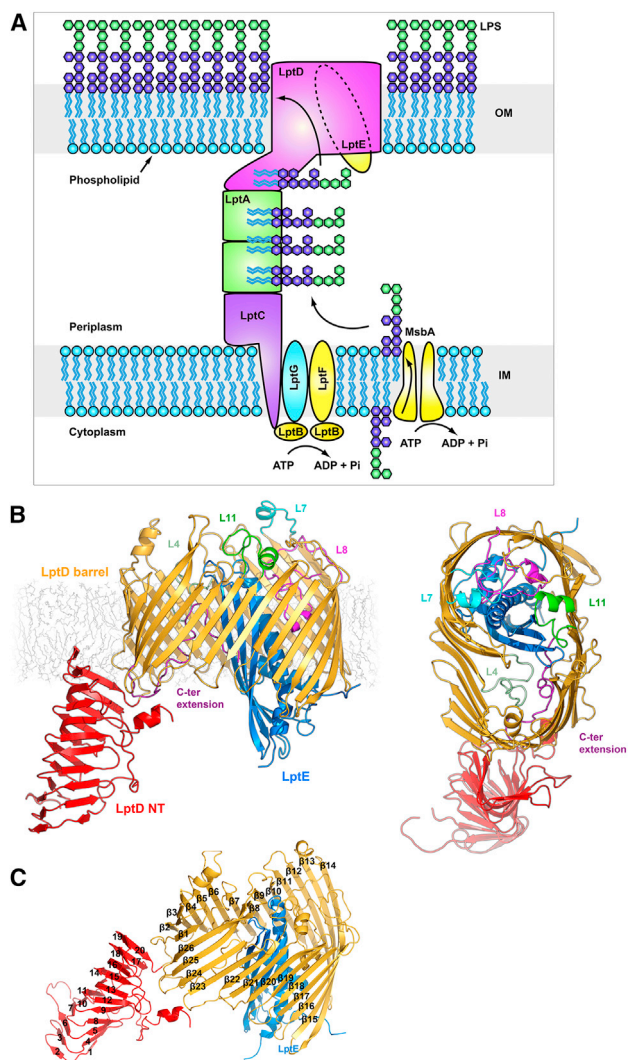

**Figure 1. Structure of LptDE**

(A) The lipopolysaccharide transport (Lpt) system. The Lpt system is made up of seven proteins. LptBFG associate to form an ABC transporter, which extracts LPS from the outer leaflet of the inner membrane, passing it to the single-pass inner membrane protein LptC. The soluble domain of LptC associates with a string of LptA monomers, which in turn associate with the N-terminal domain of LptD to provide a hydrophobic track for LPS to transit the periplasm. LPS is transported across the outer membrane and inserted into the outer leaflet by the LptDE complex.

(B) The *KpLptDE* complex looking into the membrane and viewed from the extracellular space. The *KpLptD* barrel is colored yellow with *KpLptE* inserted into the barrel lumen and colored blue. The periplasmic N-terminal domain of *KpLptD* is shown in red. Important extracellular loops are highlighted.

(C) *KpLptDE* with the  $\beta$ -barrel strands (yellow) labeled  $\beta 1$ – $\beta 26$  and N-terminal domain strands (red) labeled 1–20.

(Dong et al., 2014; Qiao et al., 2014). Further mutagenic analysis using an LptD-depletion system identified regions of the structure that are important for function (Gu et al., 2015), and recently LPS was shown to crosslink to a number of sites within LptDE, outlining a pathway for LPS transport (Li et al., 2015).

In this study, we analyzed LptDE complexes from three medically important bacterial pathogens: we solved crystal struc-

tures of the core LptDE complex from *Yersinia pestis* (2.75 Å), *Klebsiella pneumoniae* (2.95 Å), and *Pseudomonas aeruginosa* (3.00 Å). In addition, we determined a low-resolution (4.45 Å), full-length structure of the *K. pneumoniae* LptDE complex. Despite the variation in LPS substrates among Gram-negative species, we observe a strong structural conservation where LptD forms a 26-strand bilobed  $\beta$  barrel with LptE inserted inside. We analyzed the electrostatics of all LptDE structures to reveal a striking electrostatic gradient in the barrel lumen, which may play a role in the LPS transport process. A comparison of our full-length *KpLptDE* structure with the full-length *SfLptDE* structure shows that the N-terminal domain of LptD undergoes a 21° rotation, which may aid assembly or impart flexibility on the trans-envelope LptCAD scaffold. Finally, using an in vivo system and molecular dynamics (MD) simulations, we show that Pro231 and Pro246 in strands  $\beta 1$  and  $\beta 2$  destabilize the lateral gate of LptD, which is necessary to allow passage of LPS into the outer membrane. Together our results contribute new details to the mechanism of LPS integration into the outer membrane.

## RESULTS

### Structure of the LptDE Complex

We determined four structures of the LptDE complex from three pathogenic Gram-negative species: *Y. pestis* (*YpLptDE*), *P. aeruginosa* (*PaLptDE*), and *K. pneumoniae* (*KpLptDE*). For each species, we maximized heterologous expression levels by engineering constructs to include the core of the complex (full-length LptE plus the C-terminal  $\beta$ -barrel domain of LptD) while omitting the LptD N-terminal periplasmic domain (Table S1). We initially expressed full-length constructs from all three homologs, but low expression levels for *YpLptDE* and *KpLptDE* prevented further structural characterization. Truncating the N-terminal periplasmic domain significantly increased expression levels in all three homologs. After screening for optimal expression and purification conditions, these constructs were expressed, purified, and crystallized from the detergent n-octyltetraoxyethylene (C8E4). The structures were solved by molecular replacement using *Shigella flexneri* LptDE (PDB: 4Q35) as a search model (Table 1). In addition, a low-resolution structure of the full-length *KpLptDE* complex from *K. pneumoniae* was determined, revealing a conformational change of the N-terminal domain of LptD.

LptD is composed of a periplasmic N-terminal domain and a transmembrane C-terminal  $\beta$  barrel (Figure 1). The N-terminal domain adopts a  $\beta$ -jellyroll fold, consisting of two  $\beta$  sheets arranged in a V shape that form a hydrophobic groove. This groove is predicted to be contiguous with the hydrophobic groove of LptA when LptD and LptA associate in vivo (Grabowicz et al., 2013; Sperandeo et al., 2011; Suits et al., 2008; Villa et al., 2013). The C-terminal  $\beta$ -barrel domain has 26 transmembrane antiparallel  $\beta$  strands ( $\beta 1$ – $\beta 26$ ) joined on the periplasmic side by short turns (T1–T13) and on the extracellular side by longer loops (L1–L13) that fold over the barrel lumen to form a cap. The barrel domain is kidney-bean shaped with two lobes. LptE resides in the bigger lobe (approximately 36 Å in diameter), while the smaller lobe, located near the  $\beta 1/\beta 26$  junction, is largely open and is approximately 30 Å in diameter at the periplasmic opening, tapering toward the extracellular

**Table 1. LptDE Data Collection and Refinement Statistics**

|                                                                | <i>Yersinia</i> LptDE | <i>Klebsiella</i> LptDE | Full-Length <i>Klebsiella</i> LptDE | <i>Pseudomonas</i> LptDE |
|----------------------------------------------------------------|-----------------------|-------------------------|-------------------------------------|--------------------------|
| Data Collection                                                |                       |                         |                                     |                          |
| Wavelength (Å)                                                 | 1.0                   | 1.0                     | 1.0                                 | 1.0                      |
| Space group                                                    | P2 <sub>1</sub>       | P2 <sub>1</sub>         | I222                                | C222 <sub>1</sub>        |
| Mol/ASU <sup>a</sup>                                           | 4                     | 2                       | 1                                   | 1                        |
| X-Ray source                                                   | APS-22-ID             | APS-22-ID               | APS 23-ID-D                         | APS 23-ID-B              |
| a, b, c (Å)                                                    | 82.8, 176.3, 143.8    | 75.2, 173.0, 84.0       | 130.6, 154.9, 194.9                 | 149.1, 156.1, 115.8      |
| α, β, γ (°)                                                    | 90, 96.1, 90          | 90, 111.3, 90           | 90, 90, 90                          | 90, 90, 90               |
| d <sub>min</sub> (Å) <sup>b</sup>                              | 2.75 (2.85–2.75)      | 2.95 (3.06–2.95)        | 4.45 (4.57–4.45)                    | 3.00 (3.11–3.00)         |
| Completeness (%) <sup>b</sup>                                  | 99.3 (95.1)           | 97.4 (95.1)             | 95.6 (94.7)                         | 100.0 (100.0)            |
| Redundancy <sup>b</sup>                                        | 3.6 (3.4)             | 4.0 (3.8)               | 5.5 (4.9)                           | 7.2 (7.1)                |
| R <sub>merge</sub> <sup>b,c</sup>                              | 0.159 (0.786)         | 0.067 (0.999)           | 0.099 (0.848)                       | 0.132 (0.999)            |
| //σ(I) <sup>b</sup>                                            | 8.4 (1.48)            | 16.6 (1.34)             | 14.3 (1.8)                          | 12.4 (1.25)              |
| Refinement                                                     |                       |                         |                                     |                          |
| Resolution                                                     | 40.1–2.75             | 41.4–2.95               | 44.7–4.36                           | 49.0–2.98                |
| Reflections                                                    | 1,06,218              | 41,834                  | 10,921                              | 27,493                   |
| Atoms                                                          | 22,831                | 11,347                  | 7,275                               | 6,104                    |
| Amino acids                                                    | 2,740                 | 1,566                   | 908                                 | 731                      |
| R <sub>work</sub> <sup>d</sup> /R <sub>free</sub> <sup>e</sup> | 0.21/0.26             | 0.23/0.28               | 0.30/0.34                           | 0.24/0.29                |
| PDB ID                                                         | 5IXM                  | 5IV8                    | 5IV9                                | 5IVA                     |
| Validation                                                     |                       |                         |                                     |                          |
| Average B factor (Å <sup>2</sup> )                             | 47.0                  | 72.6                    | 97.1                                | 81.2                     |
| Bond-angle RMSD (°)                                            | 0.998                 | 0.488                   | 0.631                               | 0.668                    |
| Bond-length RMSD (Å)                                           | 0.004                 | 0.002                   | 0.003                               | 0.003                    |
| Ramachandran favored (%) <sup>f</sup>                          | 91.5                  | 93.5                    | 86.8                                | 92.5                     |
| Ramachandran allowed (%) <sup>f</sup>                          | 6.2                   | 5.9                     | 10.1                                | 6.8                      |
| Clashscore                                                     | 9.7                   | 2.7                     | 5.4                                 | 7.2                      |

<sup>a</sup>Copies of the LptDE complex per asymmetric unit.

<sup>b</sup>Indicates statistics for last resolution shell shown in parentheses.

<sup>c</sup> $R_{\text{merge}} = \sum_{hkl,j} (|I_{hkl} - \langle I_{hkl} \rangle|) / \sum_{hkl,j} I_{hkl}$ , where  $\langle I_{hkl} \rangle$  is the average intensity for a set of  $j$  symmetry-related reflections and  $I_{hkl}$  is the value of the intensity for a single reflection within a set of symmetry-related reflections.

<sup>d</sup> $R_{\text{work}} = \sum_{hkl} (|F_o| - |F_c|) / \sum_{hkl} F_o$ , where  $F_o$  is the observed structure factor amplitude and  $F_c$  is the calculated structure factor amplitude.

<sup>e</sup> $R_{\text{free}} = \sum_{hkl,T} (|F_o| - |F_c|) / \sum_{hkl,T} F_o$ , where a test set,  $T$ , is omitted from the refinement.

<sup>f</sup>Calculated with MolProbity.

side. The C terminus of the barrel domain extends beyond β26 into a short helical segment that tucks into the lumen of the barrel. The LptE core resides largely within the lumen of the LptD barrel, while its N-terminal segment extends over the wall of the barrel to the site where its lipid-modified N-terminal cysteine likely anchors it to the membrane. The LptE core consists of four β strands (S1–S4) and two α-helical segments (H1 and H2). The longer helix (H2) extends into the periplasmic space. The 40 C-terminal residues of LptE are apparently disordered and have not been observed in any crystal structure to date. As observed previously (Gu et al., 2015), a luminal gate postulated to allow core oligosaccharide and O-antigen access to the extracellular surface is formed by two luminal loops: luminal loop 1 connects strand β1 of the LptD barrel to its N-terminal domain, while luminal loop 2 connects strand β26 to the LptD C terminus. In our truncated structures, luminal loop 1 is ordered but luminal loop 2 has no visible electron density despite the presence of the LptD C terminus in the barrel. The full-length KpLptDE structure has a well-defined luminal

loop 2, stabilized by the presence of the LptD N-terminal domain.

### ***P. aeruginosa* LptDE Shows Distinct Structural Features**

The four LptDE structures presented here display a striking similarity to the LptDE structures from *S. flexneri* (SfLptDE) (Qiao et al., 2014) and *S. typhimurium* (StLptDE) (Dong et al., 2014) (Figure S1). The four most similar structures, YpLptDE, KpLptDE, SfLptDE, and StLptDE, have sequence identities of 65%–91% (Figures S2 and S3), with C $\alpha$  backbone root-mean-square deviations (RMSDs) of 0.50–0.60 Å, relative to the SfLptDE structure. However, the most divergent sequence, PaLptDE (with less than 28% identity to the others) shows larger structural differences, with an RMSD of 1.4 Å for LptE and 2.3 Å for LptD relative to the SfLptDE structure.

The major structural differences of PaLptDE are concentrated in its loop regions (Figure S4). The longest insertion, containing 23 residues, is located in L6 and forms an extended loop that folds back on the extracellular side of the barrel above the

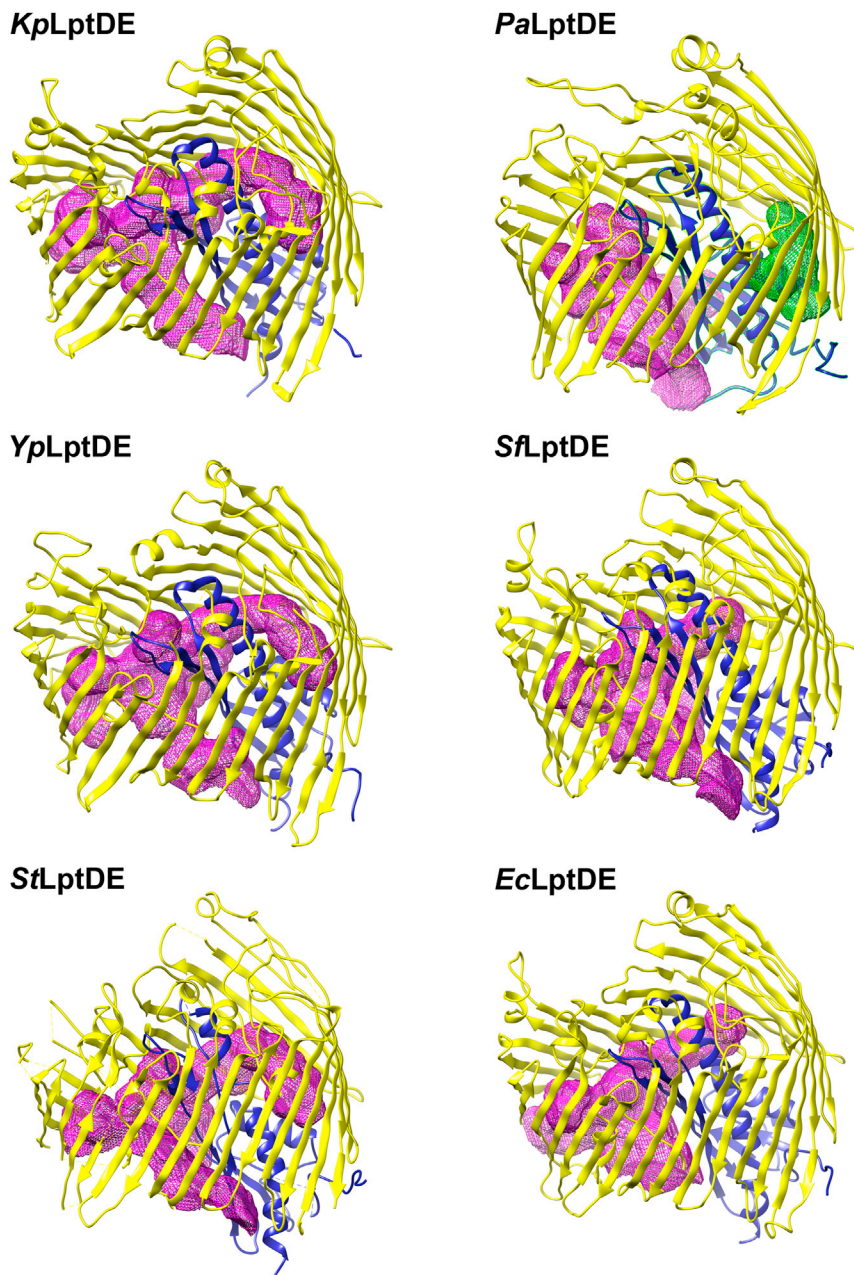

**Figure 2. Luminal Cavity Representation for Known LptDE Structures**

The luminal cavities were calculated with the Voss Volume Voxelator webserver (Voss and Gerstein, 2010) and visualized with UCSF Chimera. The most closely related structures have a very similar lumen shape and volume, while *PaLptDE* has a larger luminal volume that is divided into two cavities by the LptE plug domain. Calculated volumes and surface areas for the luminal cavities are listed in Table S2.

The *PaLptD* barrel lumen harbors further structural differences. L4 is a distorted  $\beta$  strand normally oriented toward the periplasmic side. However, in *PaLptD* this loop adopts a different conformation and points toward the luminal C terminus. This can be attributed to a sequence variation from the highly conserved “KYGSSTDG” pattern found in most LptDs. In our *PaLptD* structure the luminal C terminus is not resolved and has very poor density. The corresponding sequence of this segment is also less conserved, including the short  $\alpha$  helix and several residues flanking it. Based on the sequence divergence, the C terminus might adopt a somewhat different conformation in *PaLptD*.

Surface-area analysis with PISA (Krisinel and Henrick, 2007) shows that both *PaLptD* and *PaLptE* have the largest accessible and the smallest buried surface areas of the known LptDE structures (Table S2). However, this can be partially attributed to the absence of the C-terminal segment in the structure. With the C-terminal segment modeled into the final structure, the buried surface area is still smaller than average by  $\sim 1\%$ . The total accessible surface of the LptDE protein assembly shows comparable values ( $\sim 33,000 \text{ \AA}^2$ ) across different species, with *PaLptDE* being the exception with

narrower part of the lumen. Despite the modest 3.0- $\text{\AA}$  resolution of the *PaLptDE* structure, the density of this loop is fairly well defined due to crystal packing interactions with a symmetry-related LptE molecule. The second insertion contains 11 residues and adopts a helical structure in L9. This loop is positioned above the LptE plug and interacts directly with the  $\beta$ -turn motif formed by L11. This  $\beta$ -turn motif is unique to the *PaLptDE* structure, since in all other structures it is replaced by two small  $\alpha$  helices. Sequence alignments for L11 show that while most LptD structures have a segment of conserved residues, *PaLptD* has 20 non-conserved amino acids (Figure S2). The absence of two conserved prolines in L11 may be responsible for the alternative secondary structure adopted by this loop in *PaLptD*.

36,300  $\text{\AA}^2$  regardless of the presence of the C terminus. This larger total surface area translates into a larger molecular volume of 93,170  $\text{\AA}^3$  compared with  $\sim 88,000 \text{ \AA}^3$ , and a larger lumen volume of 9,695  $\text{\AA}^3$  compared with 7,710–9,380  $\text{\AA}^3$  for the other structures. *PaLptDE* has the largest luminal volume, composed of two luminal cavities, in contrast to only one in all of the other structures (Figure 2). This seems to be caused by the closer positioning of LptE to the LptD barrel wall in the *PaLptDE* structure. Despite the two cavities, the surface area is similar to that of the other structures, meaning that the shapes of the cavities are closer to a spherical shape. The other LptDE luminal cavities are more elongated and therefore have greater surface area. This larger luminal cavity might be necessary to accommodate the bulkier O antigen of *Pseudomonas* LPS.

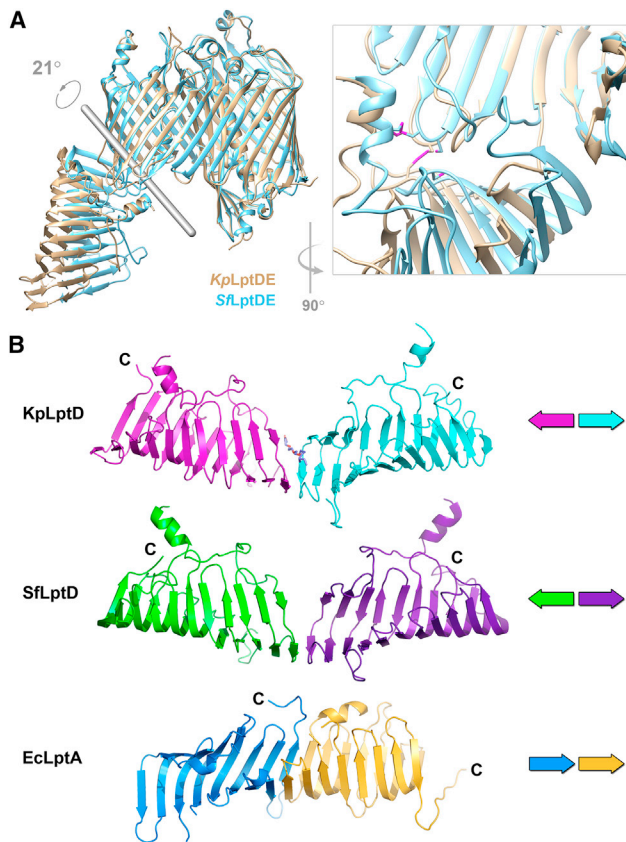

**Figure 3. N-Terminal Domain of LptD**

(A) Flexibility of the LptD N-terminal domain. The N-terminal domain of *KpLptD* (wheat) rotates 21° with respect to the N-terminal domain of *SfLptD* (blue) with the rotation axis shown in gray. *KpLptD* P230 and the disulfide formed by *KpLptD* C719 (*SfLptD* P231 and C725, respectively) to a Cys on the N-terminal domain constitute the hinge for the domain movement (inset, disulfides highlighted in magenta). The distal tip of the N-terminal domain is translated by 24 Å.

(B) The LptD N-terminal domain crystal contacts mimic an LptA-LptA interaction. The N-terminal domains of full-length *KpLptDE* (magenta) and *SfLptDE* (green) participate in crystal contacts with their symmetry-related N-terminal domain (blue and purple, respectively). These interactions include residues K36 and Y39, which have been shown to photo-crosslink to LptA (Freinkman et al., 2012). While the head-to-head orientation of the interface is different compared with the LptD/LptA interface, which is head-to-tail as shown for the *EcLptA* dimer (blue and orange), an interaction similar to this permits the formation of the continuous trans-periplasmic hydrophobic groove through which LPS molecules are shuttled to the outer membrane.

Although not present in our structures, *PaLptDE* also has a long insertion in its N-terminal domain. It is unclear how these divergent structural features contribute to the function of *PaLptDE*.

### LptD N-Terminal Domain Flexibility

The current model of the Lpt system postulates a physical complex to channel LPS from the inner to the outer membrane, beginning with LptC in the inner membrane, followed by LptA in the periplasm, and ending with LptD in the outer membrane (Figure 1A). The N terminus of LptD adopts the same  $\beta$ -jellyroll fold as LptA, and is predicted to interact with LptA in an end-

to-end fashion, similar to LptA homo-oligomers (Suits et al., 2008), creating a continuous hydrophobic groove along which LPS can travel. The position of the N-terminal domain relative to the barrel allows the lipid A portion of LPS to be inserted directly into the membrane, outside the LptD barrel, while the polysaccharide portion proceeds through the lumen of the barrel to the extracellular space. Comparing the two full-length LptDE structures containing the LptD N-terminal domain, that of *SfLptDE* (Qiao et al., 2014) and our *KpLptDE*, the N-terminal periplasmic domains are shifted and oriented at different angles relative to the plane of the membrane, inferred from the aligned barrel domains (Figure 3A). Despite modest resolution of the full-length *KpLptDE* structure, density for the N-terminal domain is clearly shifted by greater than 20 Å at the distal end of the N-terminal domain. We suggest that the shift arises from flexibility between the N-terminal domain and the  $\beta$  barrel, which could help maintain the integrity of the physical connection between the inner and outer membranes made up of LptC-LptA-LptD.

When examining the interface between the N-terminal domain and the barrel domain of LptD, two fixed points of contact are apparent. First, a disulfide bond connects the N-terminal domain to the  $\beta$  barrel, between  $\beta$ 24 and  $\beta$ 25. Second, on the other side of the hydrophobic groove, the N-terminal domain connects to the  $\beta$  barrel by a flexible linker polypeptide (luminal loop 1) followed by a conserved proline (P231) that “anchors” the start of  $\beta$ 1. Comparing the two full-length LptDE structures, the attachment points between the N- and C-terminal domains are within 7 Å of each other, while the distal ends of the N-terminal domain are shifted more than 20 Å (Figure 3A).

The two full-length LptDE structures also differ in that the disulfides are fully formed in the *KpLptDE* structure, whereas in *SfLptDE* only one of them is formed (C31–C724). The formation of the second disulfide may induce the relative movement of the N-terminal domain. The conformations of most of the  $\beta$  barrel and the N-terminal domain are identical in the two structures, with the only differences localized in the two gating loops. Specifically, the segment connecting the  $\beta$  barrel to the N terminus adopts a different conformation. It is more “closed” in the *SfLptDE* structure by positioning close to the gating loop, and more “open” in the *KpLptDE* structure by moving away from the gating loop.

Despite the substantial rotation of the N-terminal domain, both the full-length *KpLptDE* and *SfLptDE* structures feature a conserved crystal contact interaction between residues K36 and Y39 and an adjacent symmetry-related molecule in the opposite orientation (Figure 3B). The associations between  $\beta$  jellyrolls of two symmetry-related LptD molecules are similar to canonical  $\beta$ -sheet interactions, and the interface is reminiscent of the observed LptA-LptA interaction (and predicted for the LptA-LptD interaction). However, instead of the head-to-tail positioning of the monomers observed in the LptA oligomer (Suits et al., 2008), the LptD N-terminal domains interact head to head. In the *KpLptDE* structure, this interaction is also mediated by a detergent molecule that appears to substitute for a  $\beta$  strand.

### LptD Lateral Gate

MD simulations using the *S. flexneri* structure suggested that a lateral gate opens between  $\beta$ 1 and  $\beta$ 26 to allow the lipid portion

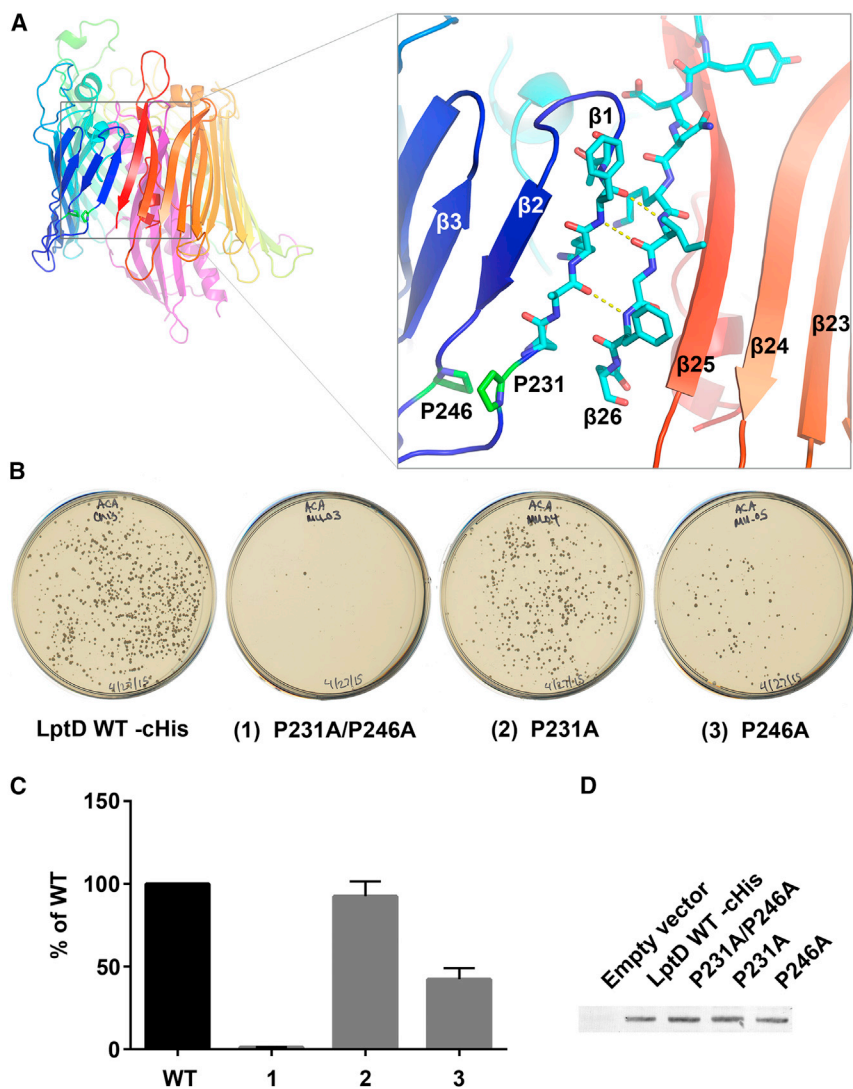

**Figure 4. Lateral Gate of LptDE**

(A) YpLptDE lateral gate. The secondary structure of  $\beta 1$  and  $\beta 2$  is disrupted by P231 and P246, respectively. This results in decreased hydrogen bonding between  $\beta 1$  and  $\beta 26$ .

(B and C) LptD knockout assay testing alanine substitutions in P231 and P246. LptD\_P231A, LptD\_P246A, and LptD\_P231A/P246A were expressed from plasmids and tested for their ability to complement the loss of the chromosomal *lptD* gene. LptD\_P231A fully complements, while LptD\_P246A partially complements the loss of chromosomal *lptD*. LptD\_P231A/P246A negligibly complements the loss of chromosomal *lptD*. The data in (C) are a colony count obtained from plates from three independent transductions. For each experiment, the data were normalized to wild-type. The normalized data were then averaged and the SEM determined.

(D) Membrane localization of wild-type and mutant LptD proteins by western blot.

a conserved proline residue, P231 (Figure 4A). A second conserved proline residue, P246, perturbs the  $\beta$ -strand geometry of  $\beta 2$ . The combined effect of these two prolines is to prevent the lower segment of  $\beta 1$  from forming typical  $\beta$ -sheet hydrogen bond interactions, thus facilitating strand separation.

To investigate the importance of LptD residues such as P231 and P246, we designed an in vivo LptD knockout assay to probe LptD function. As part of our design, we eliminated the chromosomal *lptD* gene and replaced it with a chloramphenicol resistance cassette. Because LptD is essential, we did this in the presence of a plasmid expressing wild-type LptD. The chromosomal *lptD* deletion

of LPS to enter directly into the membrane and the saccharide portion to pass through the lumen of the barrel (Gu et al., 2015). The function of the lateral gate has been verified by a loss of viability in mutants with disulfide crosslinks engineered between  $\beta 1$  and  $\beta 26$  (Dong et al., 2014). To function optimally, the opening of the lateral gate must be well controlled to balance the stability of the complex with the ability to open readily when LPS is poised for insertion. The lateral gate is fixed from opening too far on the periplasmic side by the N-terminal domain. The linkage occurs through the main chain to  $\beta 1$  and via a native disulfide between a cysteine in the N-terminal domain and a cysteine in the periplasmic loop between  $\beta 24$  and  $\beta 25$ . Opening of the lateral gate is facilitated by the reduced number of hydrogen bonds between  $\beta 1$  and  $\beta 26$  in LptD. In the family of LptDE structures available for analysis, there are between three and five peptide backbone hydrogen bonds that hold the lateral gate closed (Figure 4A), which is many fewer than found in other  $\beta$ -barrel membrane proteins (with the exception of BamA, discussed in a later section). While  $\beta 26$  maintains typical  $\beta$ -strand geometry, the secondary structure of  $\beta 1$  is disrupted by

was then transduced (using a P1 phage) into cells expressing plasmid-borne wild-type LptD under the control of the tightly regulated, arabinose-dependent pBAD promoter. As expected, in the absence of arabinose knocking out *lptD* yielded very few transductant colonies, if any. In contrast, in the presence of arabinose knocking out *lptD* yielded many transductant colonies, indicating that the plasmid-borne *lptD* was able to complement the loss of chromosomal *lptD* (Figure 4B, left plate). Using this assay, we tested various plasmid-borne LptD mutants for their ability to form colonies after transduction. Mutations that resulted in fewer colonies on the transduction plates compared with wild-type were interpreted as impairing LptD function. An advantage of this assay over existing LptD-depletion strains is that it immediately eliminates chromosomal *lptD* expression, and the effects of the mutant proteins are observed as soon as residual (chromosomally expressed) wild-type LptD already present in the membrane is diluted away by cell division. However, it should be noted that if an LptD mutant has partial activity, either by itself or in combination with the residual wild-type protein, microcolonies may grow. Rare secondary mutations may

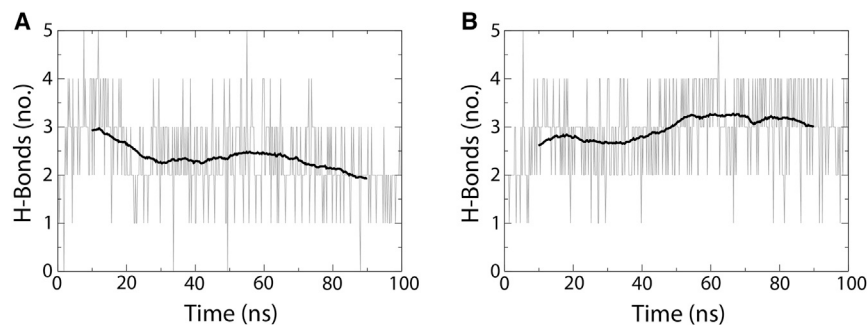

**Figure 5. Proline Residues in Strands  $\beta 1$  and  $\beta 2$  Destabilize the Lateral Gate**

(A and B) Lateral gate hydrogen bond interactions for (A) wild-type and (B) P231A/P246A MD simulations over 100 ns. Each curve (gray) is shown with a 20-ns moving average (black) overlaid.

then arise in these microcolonies, resulting in a small number of moderately sized colonies on the transduction plates. Since colony size was variable on individual transduction plates, including wild-type, all colonies were counted regardless of size.

To determine whether the prolines in  $\beta 1$  or  $\beta 2$  are critical for destabilizing the  $\beta 1/\beta 26$  lateral gate, we individually mutated *EcLptDE* P231 ( $\beta 1$ ) or P246 ( $\beta 2$ ) to alanine. In addition, the double mutant LptD\_P231A/P246A was made to test whether both prolines were necessary. The LptD\_P231A mutation produced a similar number of transductant colonies compared with wild-type while the LptD\_P246A mutation resulted in many fewer transductants (Figures 4B and 4C). The double mutant had a severe phenotype, producing almost no transductants. All three mutants produced similar levels of membrane-inserted LptD compared with wild-type LptD (Figure 4D) as detected using an anti-His-tag antibody. These results demonstrate that P246 is more important than P231 for LptDE function and that the double mutant abolishes function. Presumably these mutations prevent optimal lateral gate operation.

### Molecular Dynamics Modeling of P231A/P246A Mutations

To further investigate the structural role of the conserved proline residues in  $\beta 1$  and  $\beta 2$ , we carried out two equilibrium MD simulations of SfLptDE in its native outer-membrane environment. The first was a 100-ns trajectory of the wild-type protein and the second was a 100-ns trajectory of the LptD\_P231A/P246A double mutant, which produced almost no transductants in the LptD knockout assay. These simulations showed a marked difference in both secondary structure and hydrogen bond formation for gate residues. The average number of hydrogen bonds decreased for the wild-type protein in simulation (from 3 to 2), while that for the double mutant increased (from 2.5 to 3) (Figure 5). Figure 6 illustrates the differences in secondary structure formed over time between the wild-type and LptD\_P231A/P246A systems, most notably an increase in the propensity of  $\beta$ -strand formation in  $\beta 1$  and  $\beta 2$ , particularly in residues P(A) 231, Y240, F241, and L245. This increase in  $\beta$ -strand formation and hydrogen bonds between the strands supports the claim that the conserved proline residues play a critical role in permitting the passage of substrates by disrupting secondary structure and lateral gate hydrogen bond interactions.

### LptDE Lumen

We then turned our attention to examine the lumen of the LptDE complex through which the polysaccharide portion of

LptE within the LptD lumen by LptD helix L8 (Figures S5A and S5B). The position of LptE within the LptD lumen is highly conserved among the LptDE structures determined to date. The lumen is also closed on the extracellular end in all of the structures analyzed, indicating that some extracellular loops must move for the polysaccharide to exit into the extracellular space. A likely participant is L4 (Bishop, 2014; Li et al., 2015; Malojčić et al., 2014), a long, highly conserved loop that folds into the lumen of the barrel (Figure S5C). Relatively few interactions stabilize the positioning of this large loop within the barrel.

The most striking feature of the LptDE lumen is that its electrostatic surface potential becomes increasingly negative near the extracellular surface (Figures 7A and S6). The characteristic increase in electronegativity is conserved in the five different LptDE structures. The increasing electronegativity is notable, in contrast to other  $\beta$ -barrel proteins including Cir (PDB: 2HDF), FyuA (PDB: 4EPA), and BtuB (PDB: 1NQE), all of which exhibit a more evenly distributed surface potential within their lumens. Considering the similar charge between LPS and the lumen of the LptDE complex, we hypothesize that the resulting charge repulsion functions to prevent the lodging of LPS molecules within the LptD lumen before translocation can be completed (Figure 8).

To test the hypothesis that the repulsive interaction between LPS and the LptDE barrel lumen is important for insertion, we designed mutants for a functional study. Using an *E. coli* homology model, mutants were designed to change the electronegative lumen to neutral (Asp to Asn) or positive (Asp to Lys) (Figure S7). The neutralizing mutation LptD\_D330N/D342N/D344N/D352N produced a similar number of transductant colonies compared with wild-type, indicating normal LptDE function (Figures 7B and 7C). In contrast, mutation of the negatively charged aspartates to positively charged lysines produced noticeable effects. LptD\_D330K exhibited approximately half as many transductants while LptD\_D330K/D342K/D344K/D352K exhibited many fewer transductants compared with wild-type (Figures 7B and 7C). Membrane-inserted expression levels for all of these LptD mutants were comparable with those of wild-type (Figure 7D) as detected using an anti-His-tag antibody. These results suggest that as the positive charge of the LptDE lumen is increased, transport of LPS becomes more difficult. One explanation for this observation is that the increasingly positive environment also increases the likelihood that an LPS molecule might stall within LptDE, not only failing to complete insertion of that particular LPS molecule but also blocking further transport of LPS molecules through that LptDE complex.

LPS passes. After mapping the surface of the luminal cavity (Figure 7A), we observed the lumen tapering toward the extracellular end (from 30 to 22 Å). The taper results largely from the positioning



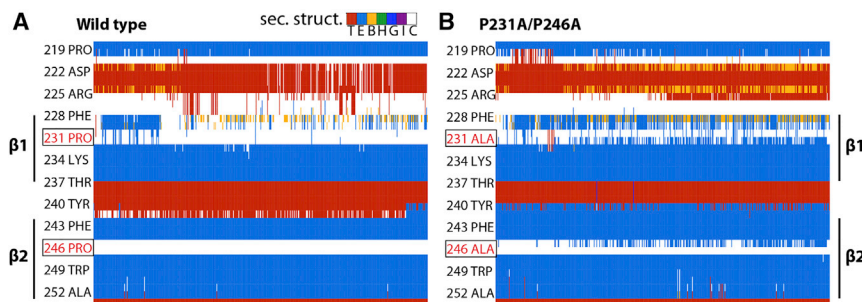

**Figure 6. Contribution of Strands  $\beta 1$  and  $\beta 2$  to Stability of the Lateral Gate**

(A and B) Secondary structure around strands  $\beta 1$  and  $\beta 2$  shown over the course of the simulation for (A) wild-type and (B) P231A/P246A SfLptDE. Notable increases in  $\beta$ -strand formation can be observed for residues P(A)231, Y240, F241, and L245. The mutated residues are boxed and colored in red. The key at the top of (A) shows the colors for the seven standard secondary structures from the Dictionary of Protein Secondary Structure, in particular, the extended  $\beta$  sheet (E, light blue) and turn (T, red).

## DISCUSSION

The emergence of multidrug-resistant Gram-negative bacteria is a great threat to human health that requires new therapeutics to stem the tide (Livermore, 2004; Nikaido, 2009). The essential outer-membrane protein complex LptDE is a promising target for development of these new antimicrobial compounds. Initial structures of the complex revealed the architecture of the domains of the complex that are essential for function (Dong et al., 2014; Qiao et al., 2014), and recent biochemical characterization has identified critical regions of the structure (Gu et al., 2015) and traced the path of substrate LPS molecules through the complex (Li et al., 2015). With the addition of LptDE structures from *Y. pestis*, *P. aeruginosa*, and *K. pneumoniae* from this study, we are able to provide an analysis of a collection of LptDE structures from five species with medical relevance. The LptDE complex is the largest monomeric  $\beta$ -barrel protein described to date, and the only outer-membrane protein to possess a barrel-and-plug architecture composed of two separate polypeptides. The population of LptDE structures is remarkable in similarity despite being derived from divergent sequences, with sequence identity as low as 25% between PaLptDE and SfLptDE. The structural conservation is also notable in the context of the wide range of LPS substrates given the dramatic O-antigen variability among Gram-negative species. This similarity notwithstanding, large insertions and differing secondary structure are observed in the extracellular loops of PaLptDE in comparison with the other structures.

There is a new class of peptidomimetic antibiotics that specifically target the N-terminal periplasmic domain of PaLptD (Srinivas et al., 2010). Although our PaLptDE structure does not include the N-terminal periplasmic domain, we note that the N-terminal domain is more variable than the  $\beta$  barrel among LptD homologs, with the N-terminal domain of PaLptD consisting of about 300 residues compared with only 180 in *E. coli* K12. This may confer drug specificity. Analysis of lipid A modifications as a probe of LPS transport demonstrated that the peptidomimetic drug inhibits PaLptD-mediated transport of LPS to the outer membrane (Werneburg et al., 2012). The recently solved structure of PaLptH, an LptA homolog, adds further information (Bollati et al., 2015). A PaLptD N-terminal domain homology model was created based on the known structures of SfLptD and PaLptH (to model the N terminus of LptD). The homology model is still missing  $\sim 90$  residues specific to PaLptD, but suggests that the peptidomimetic antibiotic may act as a competitive inhibitor to prevent LPS binding and subsequent transport

to LptD. However, without structures of the LptD-LPS and LptD-antibiotic complexes it is difficult to draw specific conclusions on the mode of binding and inhibition of LPS transport.

Comparing the full-length SfLptDE with the full-length KpLptDE structure from this study, the rotation of the N-terminal domain with respect to the  $\beta$ -barrel domain is striking. The flexible hinge between the LptD domains suggested by this observation could play an important role in maintaining the integrity of the physical link between the inner and outer membranes, made up of LptC-(LptA)<sub>n</sub>-LptD, along which LPS passes.

Upon the arrival of LPS at the inner face of the outer membrane, the LptD barrel is thought to open between strands  $\beta 1$  and  $\beta 26$ , allowing the lipid A domain of LPS to be inserted directly into the membrane by the lateral gate while the polysaccharide portion transits through the lumen of the barrel. Partial lateral gates, allowing diffusion of substrates but not opening the entire span of the membrane, have been observed in several outer-membrane proteins (Cuesta-Seijo et al., 2010; Hearn et al., 2009; Hong et al., 2006; Hwang et al., 2002; Khan and Bishop, 2009; Van den Berg et al., 2004). The only other known structure with a fully open lateral gate is BamA, a 16-stranded  $\beta$  barrel responsible for the folding and insertion of substrate  $\beta$ -barrel proteins into the outer membrane (Noinaj et al., 2013). In contrast to the  $\beta 1/\beta 16$  lateral gate of BamA, which spontaneously opens in MD simulations and is stabilized by only two hydrogen bonds (Noinaj et al., 2013), LptD strands  $\beta 1$  and  $\beta 26$  are more tightly associated. MD simulations of the SfLptDE complex have demonstrated a lateral gate opening, but only when extreme pressure ( $-65$  bar) was applied to the system (Dong et al., 2014). Under these conditions, barrel opening was followed within 10 ns by membrane rupture. When we simulated the same structure for 4.5  $\mu$ s, including 750 ns at an elevated temperature of 340 K, no spontaneous gate opening occurred (K.L. and J.C.G., unpublished data), in contrast to similar simulations for BamA (Noinaj et al., 2013), and new crystal structures showing open and closed  $\beta$  barrels for the multi-protein BAM complex (Bakelar et al., 2016; Gu et al., 2016; Han et al., 2016). In this study, we have demonstrated that the lateral gate architecture is dependent upon the conserved proline residues P231 and P246. Mutation of these residues to alanine resulted in reduced viability in vivo assays, while in silico MD modeling of the mutations resulted in closer association of  $\beta 1$  and  $\beta 26$ .

Unlike the lateral gate of BamA that needs to open wide enough to accommodate strand-by-strand insertion of multiple  $\beta$  strands, LptDE requires only a relatively small opening to allow lipid A to pass through to the outer leaflet of the outer membrane.

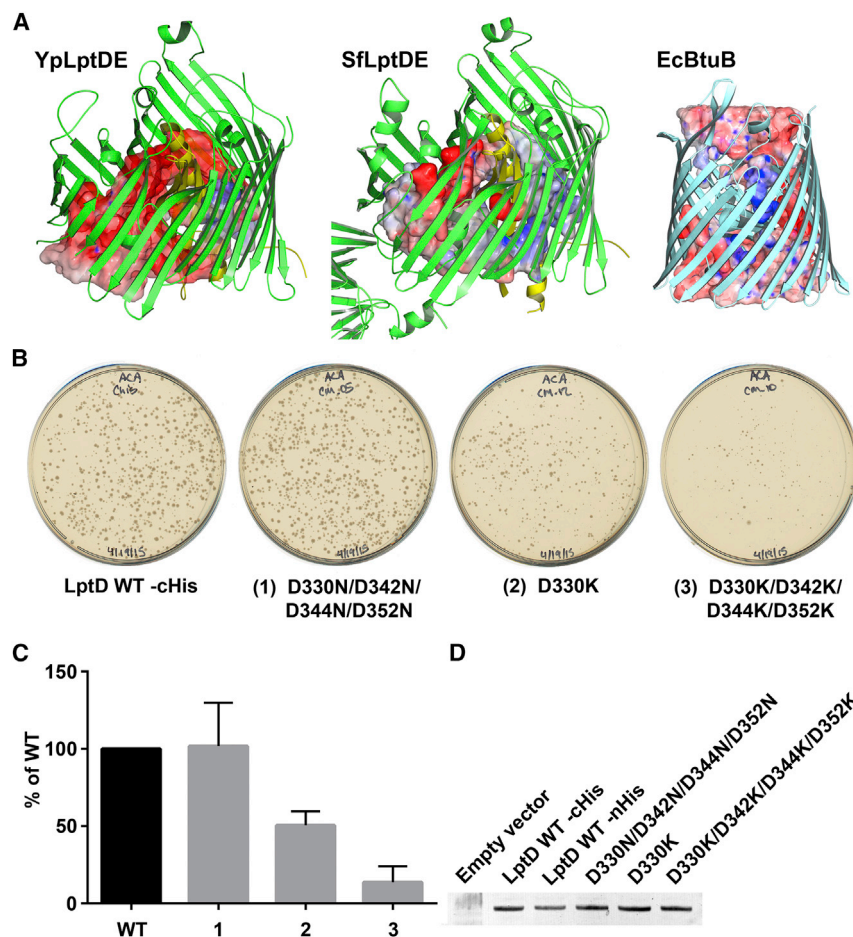

**Figure 7. LptDE Luminal Electrostatics**

(A) Increasing electronegativity of the LptDE lumen. The solid surface is a casting of the luminal cavity of LptDE generated by populating all open areas with water molecules using Hollow. Positive areas are represented in blue (+20 kT), neutral in white, and negative in red (−20 kT). The increasing electronegativity is characteristic of LptDE, in contrast to all other outer-membrane proteins analyzed. B-12 transporter BtuB from *E. coli* (PDB: 1NQE) is shown for comparison.

(B and C) *LptD* knockout assay testing luminal electrostatics. LptD\_D330N/D342N/D344N/D352N is able to complement the loss of chromosomal LptD efficiently. LptD\_D330K is able to complement the loss of chromosomal expression with reduced efficiency. LptD\_D330K/D342K/D344K/D352K is poorly able to complement the loss of chromosomal LptD. The data in (C) are a colony count obtained from plates from three independent transductions. For each experiment, the data were normalized to wild-type. The normalized data were then averaged and the SEM determined.

(D) Membrane localization of wild-type and mutant LptD proteins by western blot.

Consequently, the LptDE lateral gate is fixed from opening too far by the primary structure connection to the N-terminal domain and by the conserved disulfide bond between the N-terminal domain and the turn between  $\beta 24$  and  $\beta 25$ . With a connection to each side of the lateral gate, the N-terminal domain limits the maximum opening of the LptD barrel and physically blocks LPS escape into the inner leaflet of the outer membrane.

Once inside the tapering lumen of LptDE, the conserved, increasingly electronegative environment creates an energetically unfavorable repulsion with the negatively charged LPS sugar domain that is resolved once the exit pore opens and the transiting LPS molecule can interact with the charge-stabilized outer leaflet of the outer membrane (Figure 8). From the mutations modifying the electrostatics of the barrel lumen, we are able to conclude that a strongly electronegative lumen of the LptDE barrel is not necessarily required for LPS transport, but an electropositive environment does inhibit LptDE function in a progressive manner. This result suggests that the charge distribution of the lumen prevents the negatively charged LPS from lodging within the LptDE complex.

In conclusion, the four new LptDE structures presented here allow a fuller description of the family of LptDE proteins. We show that the basic 26-strand  $\beta$  barrel and separate plug architecture is preserved, despite large differences in sequence similarity. A comparison of our full-length *KpLptDE* structure with

assays and MD simulations, we show that two conserved prolines in strands  $\beta 1$  and  $\beta 2$  assist the opening of the lateral gate between  $\beta 1$  and  $\beta 26$ , aiding insertion of the lipid A portion of LPS into the outer membrane.

## EXPERIMENTAL PROCEDURES

### Cloning, Expression, and Purification of LptDE

LptD and LptE genes from *Y. pestis*, *K. pneumoniae*, and *P. aeruginosa* were ligation-independent cloned into modified pET9 (EMD Millipore) and modified pCDF-1b (Novagen), respectively, as detailed in Supplemental Experimental Procedures.

### Crystallization, Data Collection, and Structure Determination

Protein samples were concentrated to 10 mg/ml and crystallization screening carried out using hanging-drop vapor diffusion with a TTP Labtech Mosquito crystallization robot. Before crystallization, 3% (w/v) 1,2,3-heptanetriol was added to *KpLptDE*, full-length *KpLptDE*, and *PaLptDE*. Plates were incubated at 21°C. *YpLptDE* crystallized in 50 mM sodium cacodylate (pH 6.5), 10% (w/v) polyethylene glycol (PEG) 2000, and 15% (w/v) PEG 6000. *KpLptDE* crystallized in 200 mM ammonium phosphate (monobasic) and 20% (w/v) PEG 4000. Full-length *KpLptDE* crystallized in 25% (w/v) 1,2-propanediol, 100 mM phosphate-citrate (pH 4.2), 10% (v/v) glycerol, and 5% (w/v) PEG 3000. *PaLptDE* crystallized in 100 mM sodium citrate (pH 5.5), 100 mM NaCl, 100 mM LiCl, and 12% (w/v) PEG 4000. Crystals were harvested and flash-frozen in liquid nitrogen. Data were collected at the SER-CAT (22ID) and GM/CA-CAT (23ID-D) beamlines of the Advanced Photon Source of the Argonne National Laboratory. The data were processed using

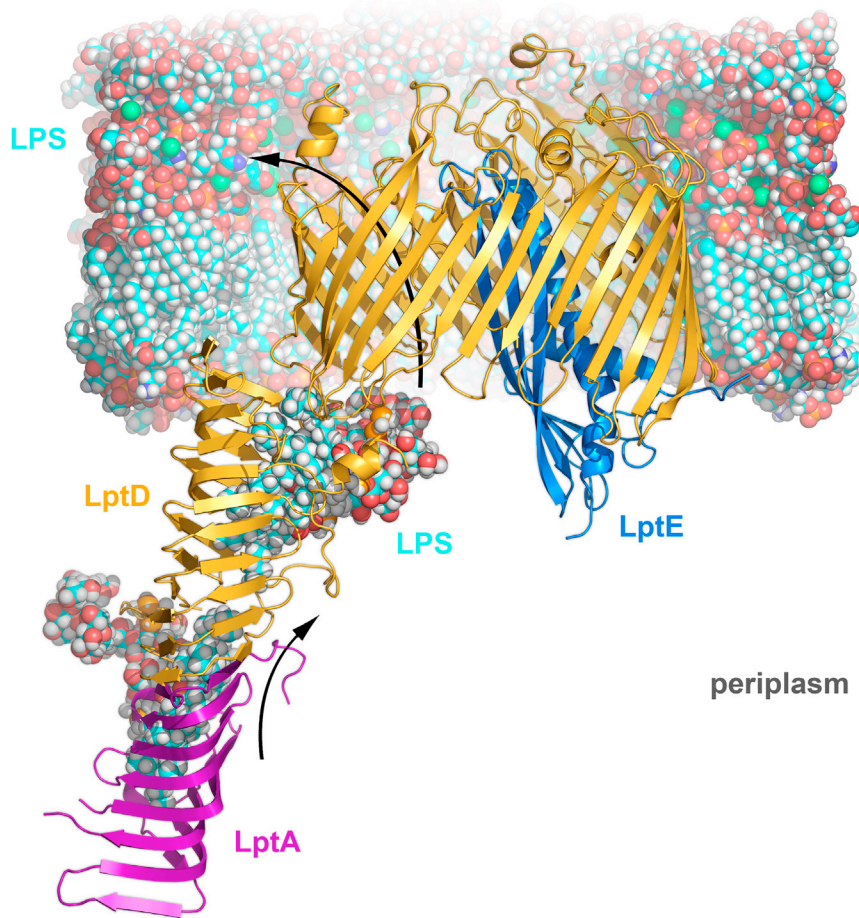

**Figure 8. LptDE Transport Sequence**

LPS is delivered to the outer membrane via a trans-periplasmic oligomer of LptA (purple), which terminates with the N-terminal domain of LptD (orange). LPS (blue) is propelled along the LptA-LptD oligomer in a continuous stream by the ATP hydrolysis of LptBFG (not shown). Arriving at the outer membrane, the lipid A portion of LPS passes directly from the N-terminal domain of LptD into the core of the membrane. The lateral gate formed by  $\beta 1/\beta 26$  opens, allowing the polysaccharide portion of LPS to pass through the tapering lumen of LptD. Once inside, extracellular loop L4 is moved, opening an exit pore and enabling polysaccharide escape, drawn in part by the cations intercalated into the existing LPS layer (Ca ions are shown as green spheres).

#### Bioinformatics Analysis

We performed BLAST (Altschul et al., 1990) searches (E value: 0.001) with the amino acid sequences of LptD (GI: 727362124, 490248919, 489204130, 446668781, 446668798, 488156903) and LptE (GI: 486124703, 496081133, 489251293, 447192691, 447192416, 391425952) from *E. coli*, *K. pneumoniae*, *P. aeruginosa*, *Salmonella enterica*, *S. flexneri*, and *Y. pestis*, against a non-redundant protein database (nr) to find all of their homologs. The results of these searches were combined separately for LptD and LptE (a total of 1,297 and 837 proteins, respectively). Some protein sequences in these families were nearly identical, which could bias results of further analysis. To eliminate redundancy we used the program CD-HIT (Li and Godzik, 2006) with a 90% sequence identity threshold to ensure that any two proteins have at most 90% pairwise identity. This resulted in a reduction to a total of

222 and 281 non-redundant representatives of LptD and LptE families, respectively. To build multiple sequence alignments (MSA) of LptD and LptE families we used the program MAFFT (Katoh et al., 2002). Figure S3 shows sequence logos of LptD and LptE families, a graphical representation of their MSA, generated by the command-line version of the WebLogo tool (Crooks et al., 2004).

HKL2000 (Otwinski and Minor, 1997), with data collection statistics listed in Table 1. Truncated LptDE complex structures were solved by molecular replacement using search models modified from *S. flexneri* LptDE (PDB: 4Q35) (Qiao et al., 2014) by the program Sculptor (Bunkóczy and Read, 2011). Truncated KpLptDE and the modified N-terminal domain from the *S. flexneri* LptDE were used in the molecular replacement of full-length KpLptDE. Molecular replacement was carried out using Phaser-MR (McCoy et al., 2007). Initial models were built using AUTOBUILD (Terwilliger et al., 2008) and completed manually in Coot (Emsley and Cowtan, 2004). Refinement was performed in Refmac (Vagin et al., 2004), phenix.refine (Adams et al., 2010), and CNS (Brunger et al., 1998) using NCS restraints and TLS where appropriate. Structural figures were prepared using PyMOL (Schrödinger, 2010), Hollow (Ho and Gruswitz, 2008), APBS (Baker et al., 2001), PDB: 2PQR (Dolinsky et al., 2007), UCSF Chimera, and Coot. Structure validation was carried out using Coot and MolProbity (Chen et al., 2010).

#### Molecular Dynamics Simulations

Full-length SflptDE (PDB: 4Q35) (Dong et al., 2014) was built into a bilayer containing an LPS outer leaflet (*E. coli* K12 variant) and a 1-palmitoyl-2-oleoyl-sn-glycero-3-phosphoethanolamine inner leaflet.  $Mg^{2+}$  ions were included as an intercalating agent for LPS, and the system was further ionized with NaCl to a concentration of 150 mM. The system was built using VMD (visual molecular dynamics) and the Solvate and Autoionize plugins. Both systems contained 150,000 atoms (Humphrey et al., 1996). The Hydrogen Bonds and Timeline plugins included with VMD were used to create Figures 4 and 5, respectively. The hydrogen bond cutoff was set at a 3.5-Å donor-acceptor distance and 30° angle. The two selections used for the calculation were the C $\alpha$  backbones of residues 229–236 and 751–758.

222 and 281 non-redundant representatives of LptD and LptE families, respectively. To build multiple sequence alignments (MSA) of LptD and LptE families we used the program MAFFT (Katoh et al., 2002). Figure S3 shows sequence logos of LptD and LptE families, a graphical representation of their MSA, generated by the command-line version of the WebLogo tool (Crooks et al., 2004).

#### LptD Strain and Phage Lysate Generation

Since the *lptD* gene is essential, the deletion had to be carried out with a covering plasmid as detailed in Supplemental Experimental Procedures.

#### LptD Knockout Assay for Testing LptD Mutants

To create mutant variants of LptD, we modified pBAD24\_LptDWTcHis by site-directed mutagenesis using Q5 (Qiagen) and QuickChange Lightning Multi (Agilent) kits. These constructs were transformed into MG1655 cells, grown to early log phase, and diluted to an  $OD_{600}$  of 0.45. For each LptD construct, two aliquots (200  $\mu$ l each) were added to 1.5-ml microcentrifuge tubes. One tube was used as a negative control while the second received 20  $\mu$ l of the P1vir phage lysate made on the  $\Delta$ *lptD* strain. Tubes were incubated at 37°C for 20 min. Phage adsorption was halted by addition of 200  $\mu$ l of 1 M sodium citrate and the transduction mixtures were plated on LB/ampicillin (50  $\mu$ g/ml)/chloramphenicol (10  $\mu$ g/ml) plates with or without 1% (w/v) arabinose to induce expression of the plasmid-borne LptD. In the presence of arabinose, functional LptD supported colony formation. However, in the absence of arabinose, *lptD* expression was strongly repressed and very few, if any, transductant colonies grew.

#### LptD Localization Assay

Membrane localization of wild-type and mutant LptD proteins was carried out by western blot with an antihistidine horseradish peroxidase-conjugated antibody (Sigma), as detailed in Supplemental Experimental Procedures.

## ACCESSION NUMBERS

Coordinates and structure factors for YpLptDE, KpLptDE, PaLptDE, and full-length KpLptDE are deposited in the PDB (PDB: 5IXM, 5IV8, 5IVA, and 5IV9, respectively).

## SUPPLEMENTAL INFORMATION

Supplemental Information includes Supplemental Experimental Procedures, seven figures, and two tables and can be found with this article online at <http://dx.doi.org/10.1016/j.str.2016.03.026>.

## AUTHOR CONTRIBUTIONS

S.K.B. and T.J.B. initiated the project. S.J.M., J.G.M., and T.J.B. designed the molecular cloning and protein engineering. S.J.M. and J.G.M. performed the cloning as well as the bacterial expression, purification, and crystallization. I.B., S.J.M., and J.G.M. solved the crystal structures. N.M. and S.J.M. designed and executed the in vivo LptD deletion experiments. K.L. and J.C.G. designed and executed the MD simulations. D.W. designed and executed the MSA for the LOGO plots. I.B., S.J.M., J.G.M., K.L., J.G.C., and S.K.B. synthesized all data and wrote the manuscript. All authors reviewed the results and approved the final version of the manuscript.

## ACKNOWLEDGMENTS

This work was supported by the Intramural Research Program of the NIH, National Institute of Diabetes and Digestive and Kidney Diseases (S.J.M., J.G.M., I.B., T.J.B., and S.K.B.), National Cancer Institute (N.M.), and National Center for Biotechnology Information (D.W.). J.C.G. is supported by a National Science Foundation CAREER award (MCB-1452464). Computational resources were provided through the Extreme Science and Engineering Discovery Environment (XSEDE), which is supported by NSF grant number OCI-1053575. We thank the staff at GM/CA and SER-CAT beam lines at the Advanced Photon Source, Argonne National Laboratory, for their assistance during data collection. Use of the Advanced Photon Source was supported by the US Department of Energy, Office of Science, Office of Basic Energy Sciences.

Received: October 14, 2015

Revised: March 24, 2016

Accepted: March 29, 2016

Published: May 5, 2016

## REFERENCES

Adams, P.D., Afonine, P.V., Bunkóczi, G., Chen, V.B., Davis, I.W., Echols, N., Headd, J.J., Hung, L.-W., Kapral, G.J., Grosse-Kunstleve, R.W., et al. (2010). PHENIX: a comprehensive Python-based system for macromolecular structure solution. *Acta Crystallogr. D Biol. Crystallogr.* **66**, 213–221.

Altschul, S.F., Gish, W., Miller, W., Myers, E.W., and Lipman, D.J. (1990). Basic local alignment search tool. *J. Mol. Biol.* **215**, 403–410.

Bakelar, J., Buchanan, S.K., and Noinaj, N. (2016). The structure of the beta-barrel assembly machinery complex. *Science* **351**, 180–186.

Baker, N.A., Sept, D., Joseph, S., Holst, M.J., and McCammon, J.A. (2001). Electrostatics of nanosystems: application to microtubules and the ribosome. *Proc. Natl. Acad. Sci. USA* **98**, 10037–10041.

Bishop, R.E. (2014). Emerging roles for anionic non-bilayer phospholipids in fortifying the outer membrane permeability barrier. *J. Bacteriol.* **196**, 3209–3213.

Bollati, M., Villa, R., Gourlay, L.J., Benedet, M., Deho, G., Polissi, A., Barbiroli, A., Martorana, A.M., Sperandeo, P., Bolognesi, M., et al. (2015). Crystal structure of LptH, the periplasmic component of the lipopolysaccharide transport machinery from *Pseudomonas aeruginosa*. *Febs J.* **282**, 1980–1997.

Bowyer, A., Baardsnes, J., Ajamian, E., Zhang, L., and Cygler, M. (2011). Characterization of interactions between LPS transport proteins of the Lpt system. *Biochem. Biophys. Res. Commun.* **404**, 1093–1098.

Brunger, A.T., Adams, P.D., Clore, G.M., DeLano, W.L., Gros, P., Grosse-Kunstleve, R.W., Jiang, J.S., Kuszewski, J., Nilges, M., Pannu, N.S., et al. (1998). Crystallography & NMR system: a new software suite for macromolecular structure determination. *Acta Crystallogr. D Biol. Crystallogr.* **54**, 905–921.

Bunkóczi, G., and Read, R.J. (2011). Improvement of molecular-replacement models with Sculptor. *Acta Crystallogr. D Biol. Crystallogr.* **67**, 303–312.

Chen, V.B., Arendall, W.B., Headd, J.J., Keedy, D.A., Immormino, R.M., Kapral, G.J., Murray, L.W., Richardson, J.S., and Richardson, D.C. (2010). MolProbity: all-atom structure validation for macromolecular crystallography. *Acta Crystallogr. D Biol. Crystallogr.* **66**, 12–21.

Chng, S.-S., Gronenberg, L.S., and Kahne, D. (2010a). Proteins required for lipopolysaccharide assembly in *Escherichia coli* form a transenvelope complex. *Biochemistry* **49**, 4565–4567.

Chng, S.S., Ruiz, N., Chimalakonda, G., Silhavy, T.J., and Kahne, D. (2010b). Characterization of the two-protein complex in *Escherichia coli* responsible for lipopolysaccharide assembly at the outer membrane. *Proc. Natl. Acad. Sci. USA* **107**, 5363–5368.

Chng, S.S., Xue, M., Garner, R.A., Kadokura, H., Boyd, D., Beckwith, J., and Kahne, D. (2012). Disulfide rearrangement triggered by translocon assembly controls lipopolysaccharide export. *Science* **337**, 1665–1668.

Crooks, G.E., Hon, G., Chandonia, J.M., and Brenner, S.E. (2004). WebLogo: a sequence logo generator. *Genome Res.* **14**, 1188–1190.

Cuesta-Seijo, J.A., Neale, C., Khan, M.A., Moktar, J., Tran, C.D., Bishop, R.E., Pomes, R., and Prive, G.G. (2010). PagP crystallized from SDS/cosolvent reveals the route for phospholipid access to the hydrocarbon ruler. *Structure* **18**, 1210–1219.

Dolinsky, T.J., Czodrowski, P., Li, H., Nielsen, J.E., Jensen, J.H., Klebe, G., and Baker, N.A. (2007). PDB2PQR: expanding and upgrading automated preparation of biomolecular structures for molecular simulations. *Nucleic Acids Res.* **35**, W522–W525.

Dong, H., Xiang, Q., Gu, Y., Wang, Z., Paterson, N.G., Stansfeld, P.J., He, C., Zhang, Y., Wang, W., and Dong, C. (2014). Structural basis for outer membrane lipopolysaccharide insertion. *Nature* **511**, 52–56.

Emsley, P., and Cowtan, K. (2004). Coot: model-building tools for molecular graphics. *Acta Crystallogr. D Biol. Crystallogr.* **60**, 2126–2132.

Freinkman, E., Okuda, S., Ruiz, N., and Kahne, D. (2012). Regulated assembly of the transenvelope protein complex required for lipopolysaccharide export. *Biochemistry* **51**, 4800–4806.

Grabowicz, M., Yeh, J., and Silhavy, T.J. (2013). Dominant negative lptE mutation that supports a role for LptE as a plug in the LptD barrel. *J. Bacteriol.* **195**, 1327–1334.

Gu, Y., Stansfeld, P.J., Zeng, Y., Dong, H., Wang, W., and Dong, C. (2015). Lipopolysaccharide is inserted into the outer membrane through an intramembrane hole, a lumen gate, and the lateral opening of LptD. *Structure* **23**, 496–504.

Gu, Y., Li, H., Dong, H., Zeng, Y., Zhang, Z., Paterson, N.G., Stansfeld, P.J., Wang, Z., Zhang, Y., Wang, W., et al. (2016). Structural basis of outer membrane protein insertion by the BAM complex. *Nature* **531**, 64–69.

Han, L., Zheng, J., Wang, Y., Yang, X., Liu, Y., Sun, C., Cao, B., Zhou, H., Ni, D., Lou, J., et al. (2016). Structure of the BAM complex and its implications for biogenesis of outer-membrane proteins. *Nat. Struct. Mol. Biol.* **23**, 192–196.

Hearn, E.M., Patel, D.R., Lepore, B.W., Indic, M., and van den Berg, B. (2009). Transmembrane passage of hydrophobic compounds through a protein channel wall. *Nature* **458**, 367–370.

Ho, B.K., and Gruswitz, F. (2008). HOLLOW: generating accurate representations of channel and interior surfaces in molecular structures. *BMC Struct. Biol.* **8**, 49.

Hong, H., Patel, D.R., Tamm, L.K., and Van den Berg, B. (2006). The outer membrane protein OmpW forms an eight-stranded beta-barrel with a hydrophobic channel. *J. Biol. Chem.* **281**, 7568–7577.

Humphrey, W., Dalke, A., and Schulten, K. (1996). VMD—visual molecular dynamics. *J. Mol. Graph.* **14**, 33–38.

Hwang, P.M., Choy, W.-Y., Lo, E.I., Chen, L., Forman-Kay, J.D., Raetz, C.R.H., Privé, G.G., Bishop, R.E., and Kay, L.E. (2002). Solution structure and

- dynamics of the outer membrane enzyme PagP by NMR. *Proc. Natl. Acad. Sci. USA* **99**, 13560–13565.
- Katoh, K., Misawa, K., Kuma, K., and Miyata, T. (2002). MAFFT: a novel method for rapid multiple sequence alignment based on fast Fourier transform. *Nucleic Acids Res.* **30**, 3059–3066.
- Khan, M.A., and Bishop, R.E. (2009). Molecular mechanism for lateral lipid diffusion between the outer membrane external leaflet and a beta-barrel hydrocarbon ruler. *Biochemistry* **48**, 9745–9756.
- Krissinel, E., and Henrick, K. (2007). Inference of macromolecular assemblies from crystalline state. *J. Mol. Biol.* **372**, 774–797.
- Li, W., and Godzik, A. (2006). Cd-hit: a fast program for clustering and comparing large sets of protein or nucleotide sequences. *Bioinformatics* **22**, 1658–1659.
- Li, X., Gu, Y., Dong, H., Wang, W., and Dong, C. (2015). Trapped lipopolysaccharide and LptD intermediates reveal lipopolysaccharide translocation steps across the *Escherichia coli* outer membrane. *Sci. Rep.* **5**, 11883.
- Livermore, D.M. (2004). The need for new antibiotics. *Clin. Microbiol. Infect.* **10** (Suppl 4), 1–9.
- Malojčić, G., Andres, D., Grabowicz, M., George, A.H., Ruiz, N., Silhavy, T.J., and Kahne, D. (2014). LptE binds to and alters the physical state of LPS to catalyze its assembly at the cell surface. *Proc. Natl. Acad. Sci. USA* **111**, 9467–9472.
- May, J.M., Sherman, D.J., Simpson, B.W., Ruiz, N., and Kahne, D. (2015). Lipopolysaccharide transport to the cell surface: periplasmic transport and assembly into the outer membrane. *Philos. Trans. R. Soc. Lond. B Biol. Sci.* **370**, [pii: 20150027].
- McCoy, A.J., Grosse-Kunstleve, R.W., Adams, P.D., Winn, M.D., Storoni, L.C., and Read, R.J. (2007). Phaser crystallographic software. *J. Appl. Crystallogr.* **40**, 658–674.
- Narita, S.-I., and Tokuda, H. (2009). Biochemical characterization of an ABC transporter LptBFGC complex required for the outer membrane sorting of lipopolysaccharides. *FEBS Lett.* **583**, 2160–2164.
- Nikaido, H. (2009). Multidrug resistance in bacteria. *Annu. Rev. Biochem.* **78**, 119–146.
- Noinaj, N., Kuszak, A.J., Gumbart, J.C., Lukacik, P., Chang, H., Easley, N.C., Lithgow, T., and Buchanan, S.K. (2013). Structural insight into the biogenesis of  $\beta$ -barrel membrane proteins. *Nature* **501**, 385–390.
- Okuda, S., Freinkman, E., and Kahne, D. (2012). Cytoplasmic ATP hydrolysis powers transport of lipopolysaccharide across the periplasm in *E. coli*. *Science* **338**, 1214–1217.
- Otwinowski, Z., and Minor, W. (1997). Processing of X-ray diffraction data collected in oscillation mode. *Methods Enzymol.* **276**, 307–326.
- Qiao, S., Luo, Q., Zhao, Y., Zhang, X.C., and Huang, Y. (2014). Structural basis for lipopolysaccharide insertion in the bacterial outer membrane. *Nature* **511**, 108–111.
- Raetz, C.R.H., and Whitfield, C. (2002). Lipopolysaccharide endotoxins. *Annu. Rev. Biochem.* **71**, 635–700.
- Raetz, C.R.H., Reynolds, C.M., Trent, M.S., and Bishop, R.E. (2007). Lipid A modification systems in gram-negative bacteria. *Annu. Rev. Biochem.* **76**, 295–329.
- Ruiz, N., Kahne, D., and Silhavy, T.J. (2006). Advances in understanding bacterial outer-membrane biogenesis. *Nat. Rev. Microbiol.* **4**, 57–66.
- Ruiz, N., Gronenberg, L.S., Kahne, D., and Silhavy, T.J. (2008). Identification of two inner-membrane proteins required for the transport of lipopolysaccharide to the outer membrane of *Escherichia coli*. *Proc. Natl. Acad. Sci. USA* **105**, 5537–5542.
- Ruiz, N., Kahne, D., and Silhavy, T.J. (2009). Transport of lipopolysaccharide across the cell envelope: the long road of discovery. *Nat. Rev. Microbiol.* **7**, 677–683.
- Schrödinger. (2010). The PyMOL Molecular Graphics System, Version 1.3r1 (Schrödinger LLC).
- Sherman, D.J., Lazarus, M.B., Murphy, L., Liu, C., Walker, S., Ruiz, N., and Kahne, D. (2014). Decoupling catalytic activity from biological function of the ATPase that powers lipopolysaccharide transport. *Proc. Natl. Acad. Sci. USA* **111**, 4982–4987.
- Simpson, B.W., May, J.M., Sherman, D.J., Kahne, D., and Ruiz, N. (2015). Lipopolysaccharide transport to the cell surface: biosynthesis and extraction from the inner membrane. *Philos. Trans. R. Soc. Lond. B Biol. Sci.* **370**, [pii: 20150029].
- Sperandeo, P., Villa, R., Martorana, A.M., Samalikova, M., Grandori, R., Dehò, G., and Polissi, A. (2011). New insights into the Lpt machinery for lipopolysaccharide transport to the cell surface: LptA-LptC interaction and LptA stability as sensors of a properly assembled transenvelope complex. *J. Bacteriol.* **193**, 1042–1053.
- Srinivas, N., Jetter, P., Ueberbacher, B.J., Werneburg, M., Zerbe, K., Steinmann, J., Van der Meijden, B., Bernardini, F., Lederer, A., Dias, R.L.A., et al. (2010). Peptidomimetic antibiotics target outer-membrane biogenesis in *Pseudomonas aeruginosa*. *Science* **327**, 1010–1013.
- Suits, M.D.L., Sperandeo, P., Dehò, G., Polissi, A., and Jia, Z. (2008). Novel structure of the conserved gram-negative lipopolysaccharide transport protein A and mutagenesis analysis. *J. Mol. Biol.* **380**, 476–488.
- Terwilliger, T.C., Grosse-Kunstleve, R.W., Afonine, P.V., Moriarty, N.W., Zwart, P.H., Hung, L.W., Read, R.J., and Adams, P.D. (2008). Iterative model building, structure refinement and density modification with the PHENIX AutoBuild wizard. *Acta Crystallogr. D Biol. Crystallogr.* **64**, 61–69.
- Tran, A.X., Dong, C., and Whitfield, C. (2010). Structure and functional analysis of LptC, a conserved membrane protein involved in the lipopolysaccharide export pathway in *Escherichia coli*. *J. Biol. Chem.* **285**, 33529–33539.
- Vagin, A.A., Steiner, R.A., Lebedev, A.A., Potterton, L., McNicholas, S., Long, F., and Murshudov, G.N. (2004). REFMAC5 dictionary: organization of prior chemical knowledge and guidelines for its use. *Acta Crystallogr. D Biol. Crystallogr.* **60**, 2184–2195.
- Van den Berg, B., Black, P.N., Clemons, W.M., and Rapoport, T.A. (2004). Crystal structure of the long-chain fatty acid transporter FadL. *Science* **304**, 1506–1509.
- Villa, R., Martorana, A.M., Okuda, S., Gourlay, L.J., Nardini, M., Sperandeo, P., Deho, G., Bolognesi, M., Kahne, D., and Polissi, A. (2013). The *Escherichia coli* Lpt transenvelope protein complex for lipopolysaccharide export is assembled via conserved structurally homologous domains. *J. Bacteriol.* **195**, 1100–1108.
- Voss, N.R., and Gerstein, M. (2010). 3V: cavity, channel and cleft volume calculator and extractor. *Nucleic Acids Res.* **38**, W555–W562.
- Werneburg, M., Zerbe, K., Juhas, M., Bigler, L., Stalder, U., Kaech, A., Ziegler, U., Obrecht, D., Eberl, L., and Robinson, J.A. (2012). Inhibition of lipopolysaccharide transport to the outer membrane in *Pseudomonas aeruginosa* by peptidomimetic antibiotics. *ChemBiochem* **13**, 1767–1775.
- Whitfield, C., and Trent, M.S. (2014). Biosynthesis and export of bacterial lipopolysaccharides. *Annu. Rev. Biochem.* **83**, 99–128.

**Structure, Volume 24**

**Supplemental Information**

**Structural and Functional Characterization  
of the LPS Transporter LptDE  
from Gram-Negative Pathogens**

**Istvan Botos, Nadim Majdalani, Stephen J. Mayclin, Jennifer Gehret McCarthy, Karl Lundquist, Damian Wojtowicz, Travis J. Barnard, James C. Gumbart, and Susan K. Buchanan**

Supplementary Information for:

**Structural and Functional Characterization of the LPS Transporter LptDE  
from Gram-negative Pathogens**

Istvan Botos<sup>1\*</sup>, Nadim Majdalani<sup>2\*</sup>, Stephen J. Mayclin<sup>1\*</sup>, Jennifer Gehret McCarthy<sup>1\*</sup>, Karl Lundquist<sup>3</sup>, Damian Wojtowicz<sup>4</sup>, Travis J. Barnard<sup>1</sup>, James C. Gumbart<sup>3</sup>, and Susan K. Buchanan<sup>1</sup>

<sup>1</sup>Laboratory of Molecular Biology, National Institute of Diabetes and Digestive and Kidney Diseases, National Institutes of Health, Bethesda, MD 20892, USA; <sup>2</sup>Laboratory of Molecular Biology, National Cancer Institute, National Institutes of Health, Bethesda, MD 20892, USA; <sup>3</sup>School of Physics, Georgia Institute of Technology, Atlanta, GA 30332, USA; <sup>4</sup>National Center for Biotechnology Information, National Institutes of Health, Bethesda, MD 20892 USA. \*These authors contributed equally to this work.  
Correspondence: [skbuchan@helix.nih.gov](mailto:skbuchan@helix.nih.gov)

Supplementary Figures:

- Figure S1: LptD and LptE structural alignments
- Figure S2: Sequence alignment of determined LptDE structures
- Figure S3: Global sequence conservation in LptD and LptE
- Figure S4: Side (3/4) view and top view of *Pa*LptDE
- Figure S5: Positioning of LptE within the LptD lumen
- Figure S6: Hollow representations of LptDE structures
- Figure S7: *In silico* modeling of charge mutations in the luminal cavity

Supplementary Tables:

- Table S1: Length of LptD and LptE constructs used in this study
- Table S2: Surface area analysis of known LptDE structures

Supplementary Experimental Procedures

**A**

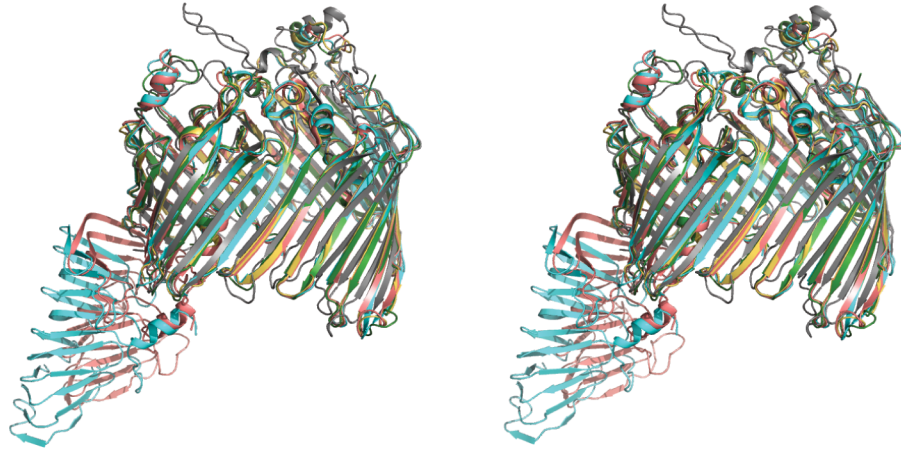

**B**

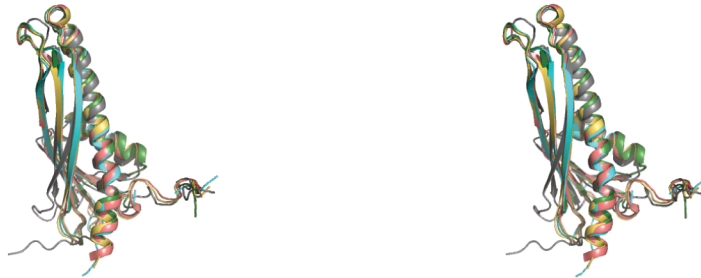

**Figure S1** (Related to Figure 1): **LptD and LptE structural alignments.** LptD (a) and LptE (b) structural alignment stereo diagrams: *Yp*LptDE (green), full-length *Kp*LptDE (cyan), *Pa*LptDE (gray), *Sf*LptDE (salmon) PDBID = 4Q35, *St*LptDE (yellow) PDBID = 4N4R





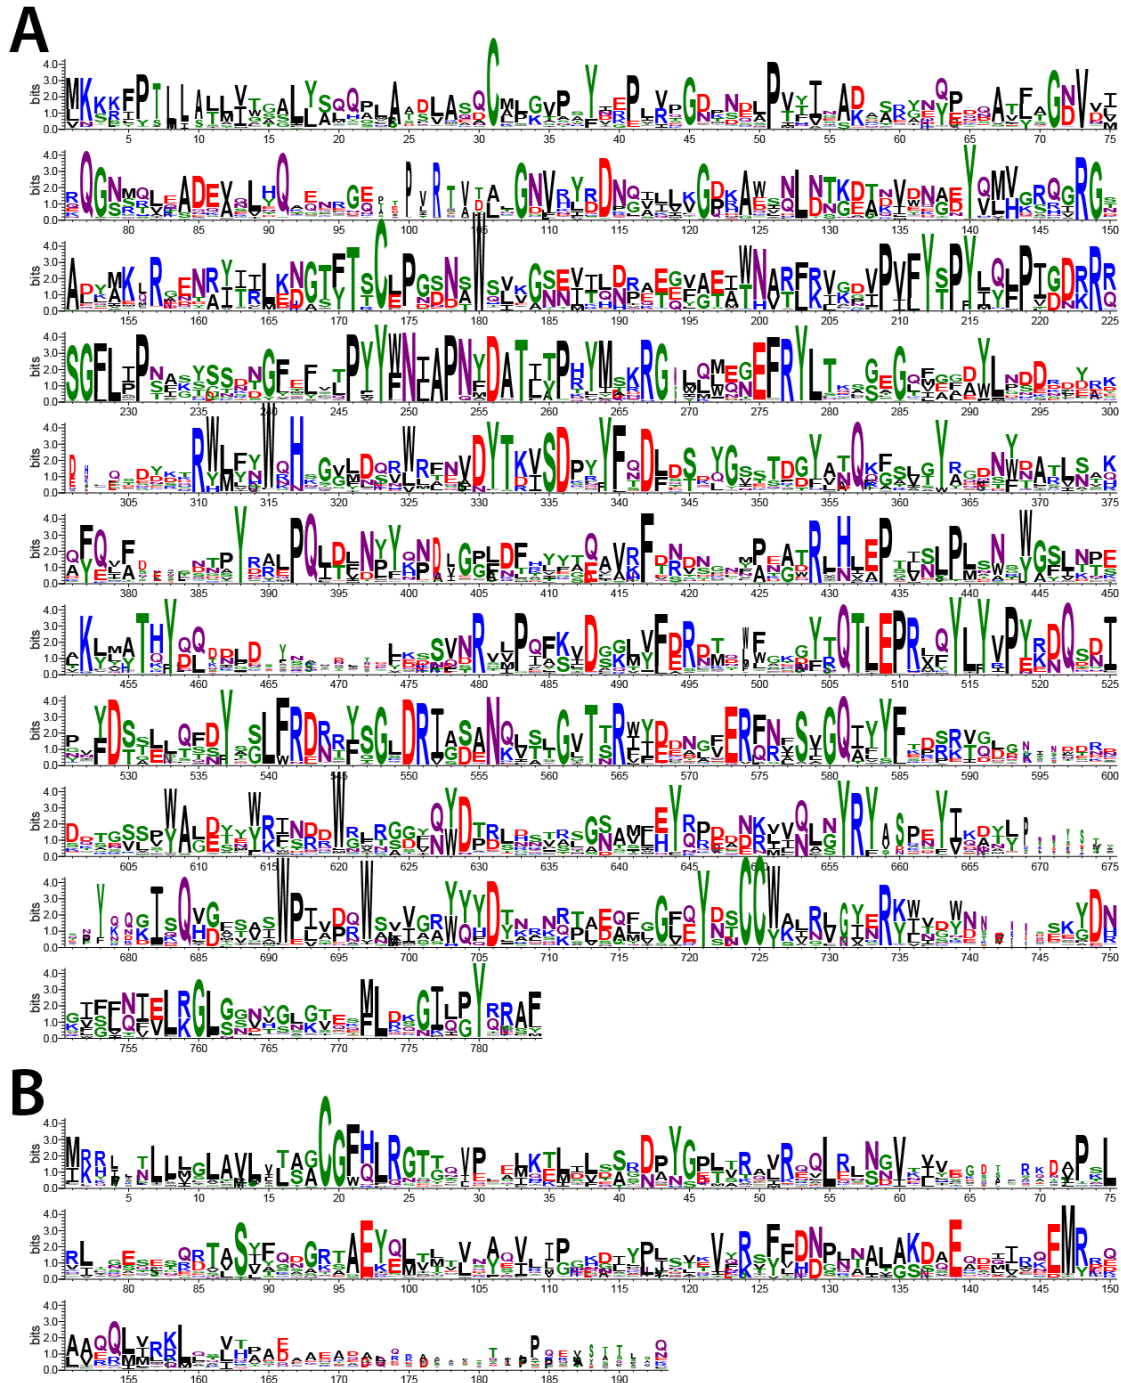

**Figure S3** (Related to experimental procedures): **Global sequence conservation in LptD and LptE.** A selection of the family of LptD and LptE sequences were analyzed for sequence conservation. **(A)** LptD sequences from 222 species were aligned. Insertions not found in the *E. coli* sequence were truncated, for clarity. **(B)** Alignment of LptE sequences from 281 species. Insertions not found in *E. coli* were truncated. Height of the letter represents prevalence of the residue at that position.

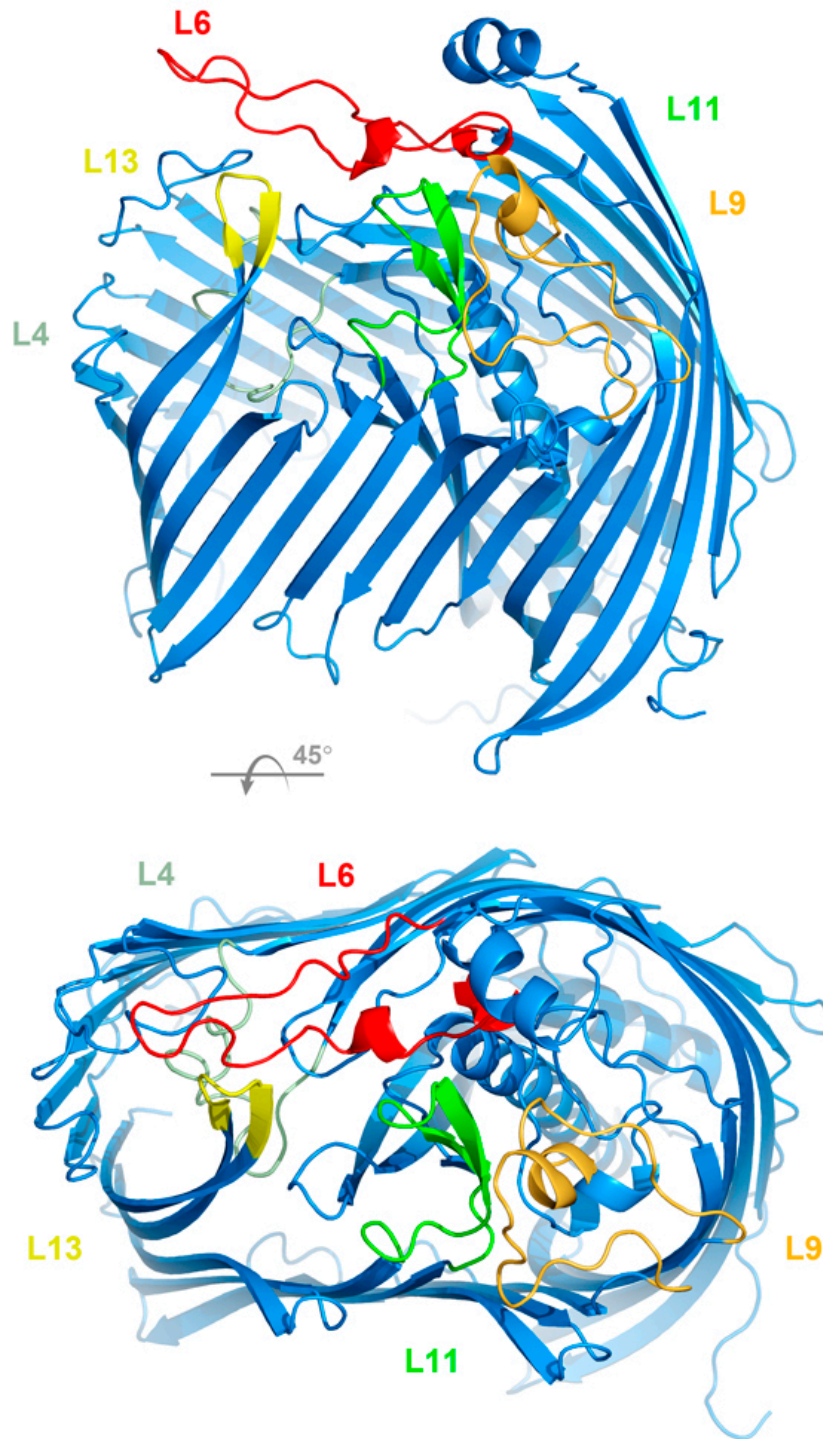

**Figure S4** (Related to Figure 1): **Side(3/4) view and top view of PaLptDE.** PaLptDE is shown in blue, with several extracellular loops highlighted: L4 in gray, L6 in red, L9 in orange, L11 in green, and L13 in yellow. Compared to the four other LptDe structures, L6 contains a 23-residue insertion and L9 contains an 11-residue insertion and divergent sequence.

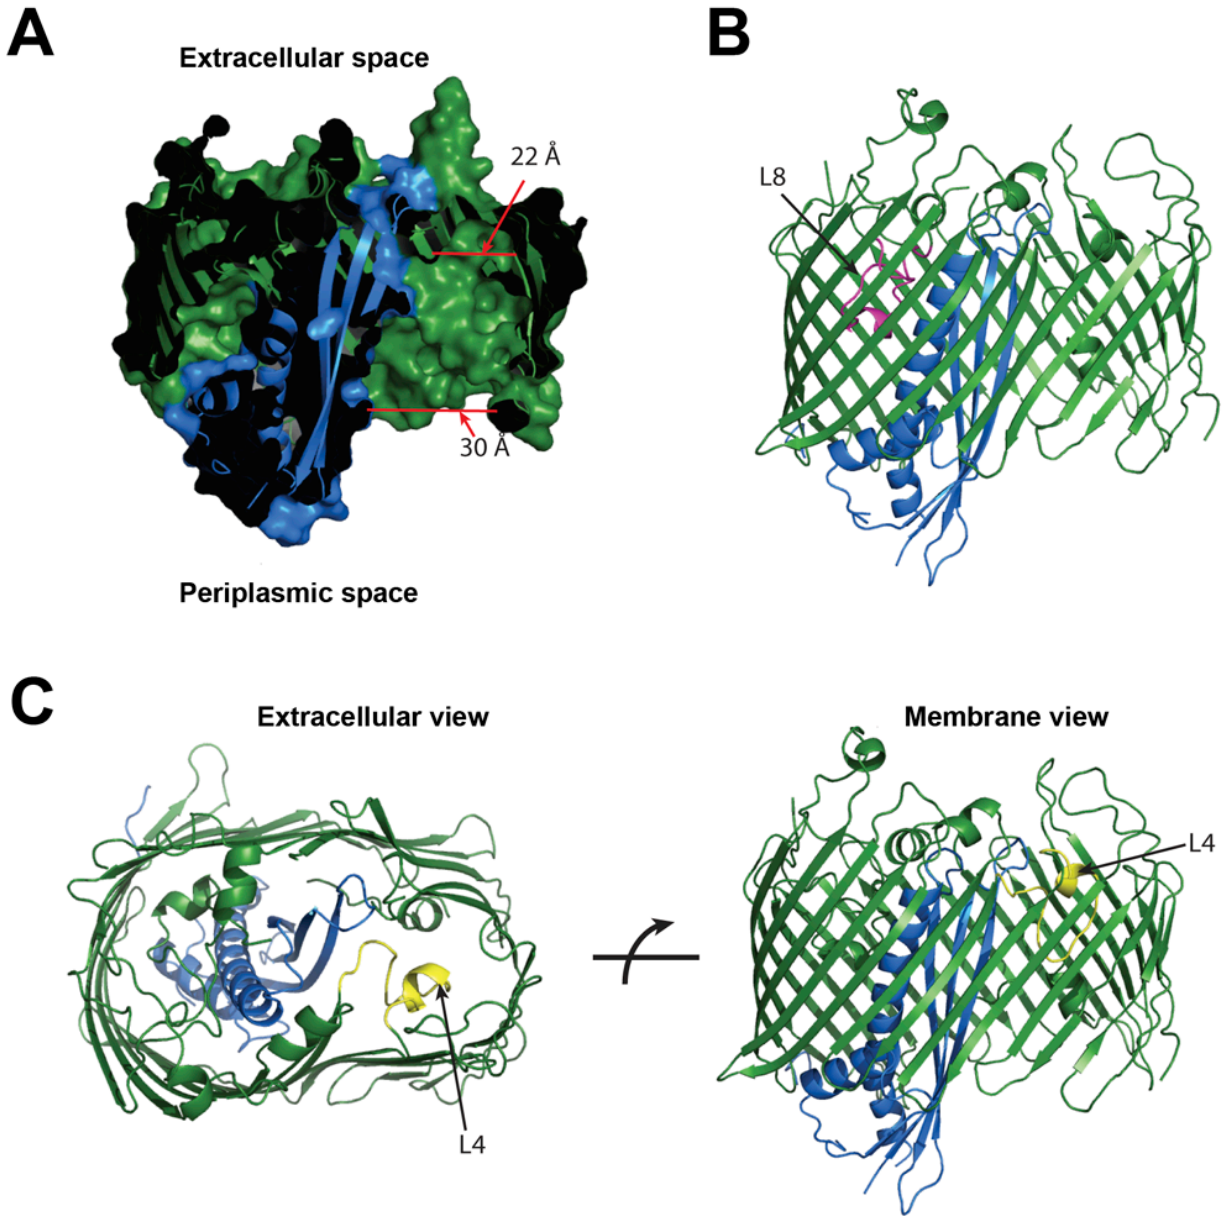

**Figure S5** (Related to Figure 1): **Positioning of LptE within the LptD lumen.** **a.** Cutaway surface of *YpLptD* (green) and *YpLptE* (blue) complex viewed from the membrane. The lumenal cavity tapers from 30 Å at the periplasm to 22 Å deep in the cavity near the extracellular space. **b.** L8 (magenta) of LptD (green) folds into the lumen of the barrel, causing LptE (blue) to reside at an angle within LptD. This results in a tapering of the lumenal cavity in the LptD barrel. View is the same as in **a.** **c.** L4 (yellow) of LptD (green) blocks the exit of LPS from the lumen into the extracellular space and likely moves to create an exit pore.

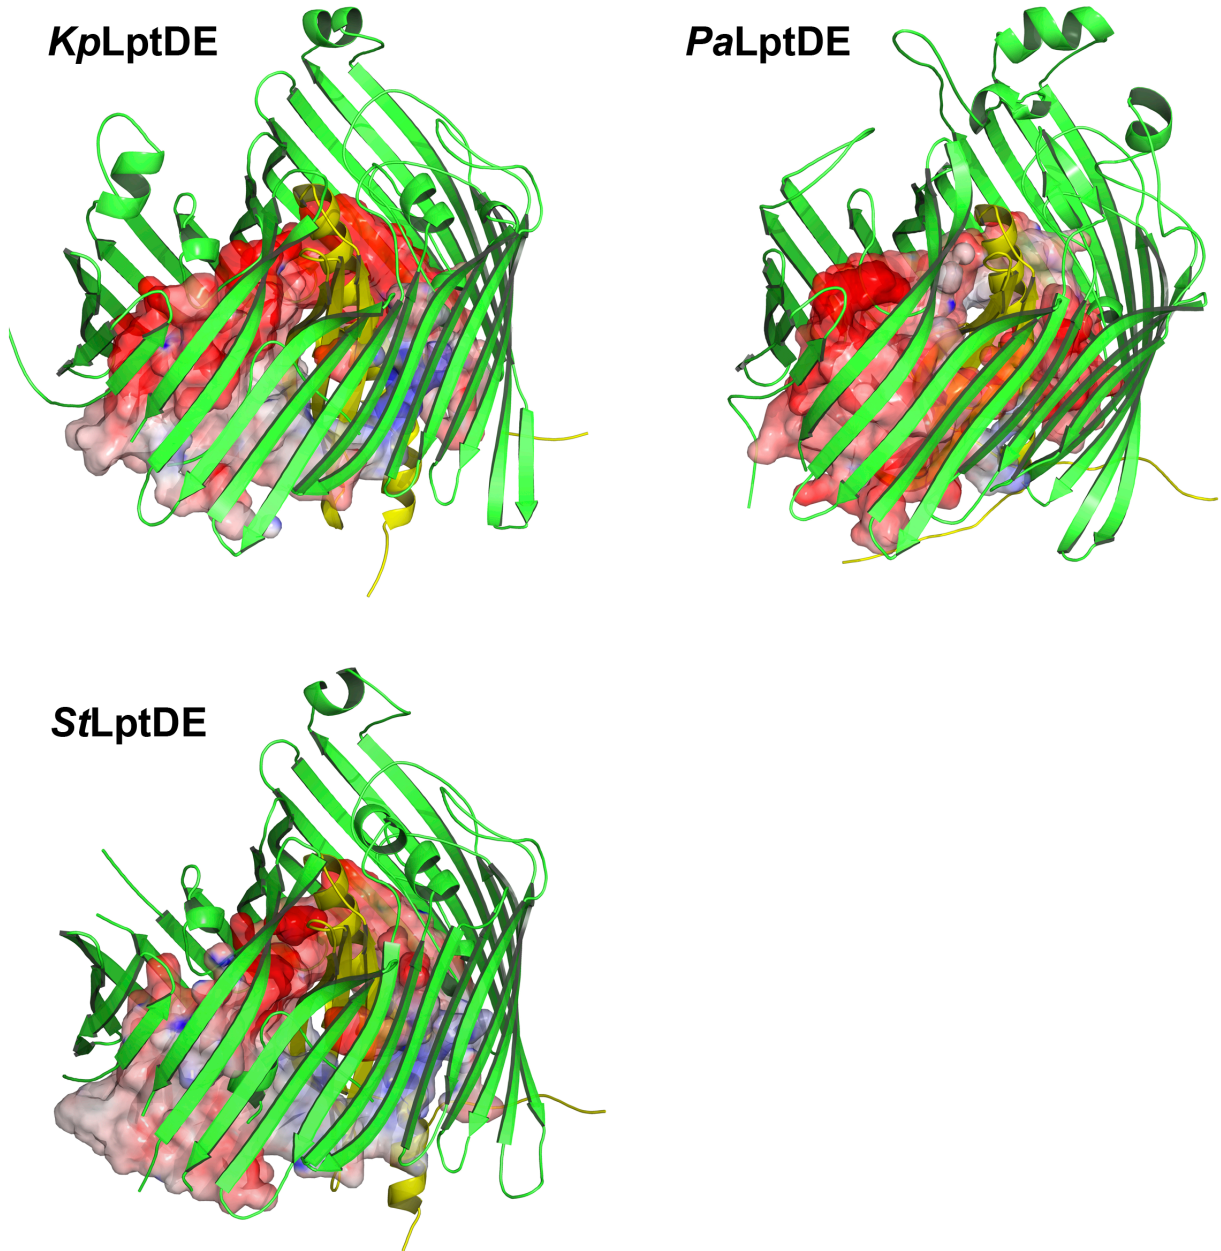

**Figure S6** (Related to Figure 7): **Hollow representations of LptDE structures.** The solid surface is a casting of the luminal cavity of *K. pneumoniae*, *P. aeruginosa* and *S. typhimurium* (PDBID 4N4R) LptDE generated by populating all open areas with water molecules using the program Hollow. Positive areas are represented in blue (+20kT), neutral in white, and negative in red (-20 kT). The electrostatic surface was generated using APBS.

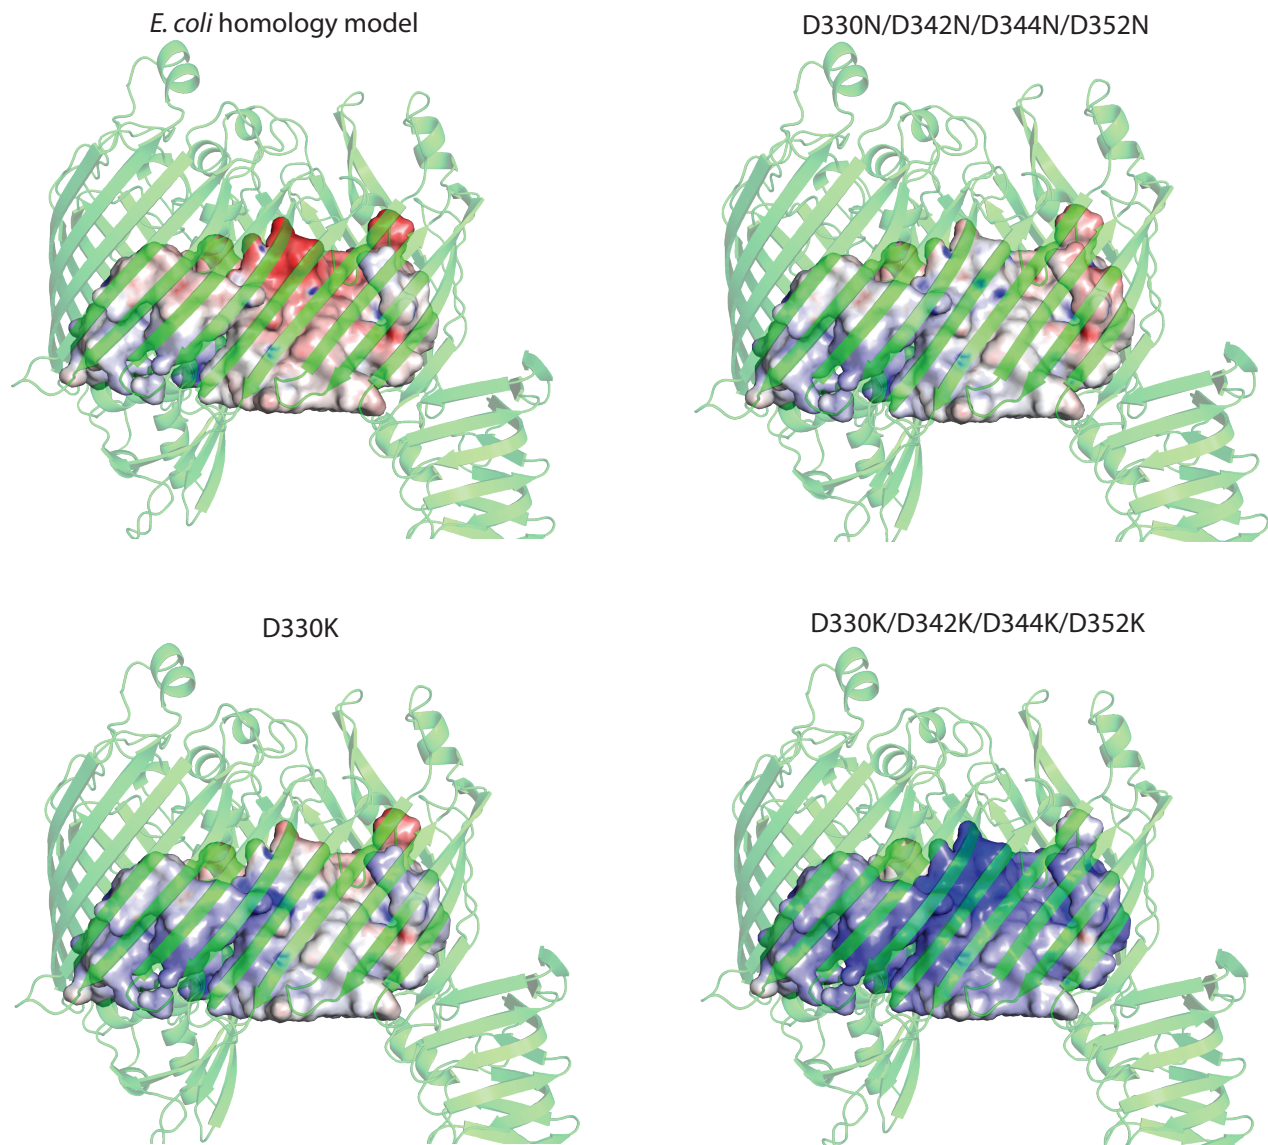

**Figure S7** (Related to Figure 7): ***In silico* modeling of charge mutations in the lumenal cavity.** A homology model of *E. coli* LptDE complex was generated from *Sf*LptDE (PDB ID 4Q35). Electrostatic charge of the lumen is mapped onto a surface representing non-protein occupied space within the lumen. Conserved aspartic acid residues were mutated *in silico* to asparagine or lysine residues. Luminal electrostatics are mapped onto the lumen surface.

**Supplemental Table 1** (Related to Figures 1 and 3): Length of LptD and LptE constructs used in this study

| Construct                   | LptD residues | LptE residues | PDB code |
|-----------------------------|---------------|---------------|----------|
| <i>Yp</i> LptDE             | 225 – 780     | 21 – 207      | 5IXM     |
| <i>Kp</i> LptDE             | 203 – 782     | 21 – 196      | 5IV8     |
| Full-length <i>Kp</i> LptDE | 25 – 782      | 20 – 196      | 5IV9     |
| <i>Pa</i> LptDE             | 301 – 924     | 21 – 207      | 5IVA     |

## Supplemental Experimental Procedures

### Cloning, expression and purification of LptDE

Primer names and sequences used for LIC cloning are listed in the Table below. The modified pET9 vector, into which LptD was inserted, contained an N-terminal PelB signal sequence, a 10X His tag, a TEV site, and LIC cloning sites. The modified pCDF-1b vector for LptE expression contained the PelB signal sequence, LIC cloning sites, and a C-terminal 6X His tag. LptD and LptE for each species were co-expressed in BL21 (DE3) cells in TB media supplemented with 50µg/ml kanamycin and 25µg/ml streptomycin to stationary phase (3-4 days). The cells were grown at 21°C without IPTG induction.

To make the pBAD24\_LptD\_WT plasmid, *E. coli* LptD (residues 1 – 784) was cloned into pBAD24 using primers pBAD24\_LptD\_NcoI\_for2 and pBAD24\_LptD\_HindIII\_rev2. A C-terminal 10X histidine tag was subsequently inserted into this vector using primers pBAD\_LptD\_chis10\_for and pBAD\_LptD\_chis10\_rev to create pBAD24\_LptD\_WTchis. This vector and its mutant derivatives were used in the LptD knock-out and localization assays.

| Primer sequences and names/numbers for constructs used in this study |                  |                           |                                                             |
|----------------------------------------------------------------------|------------------|---------------------------|-------------------------------------------------------------|
| Function:                                                            | Gene:            | Name:                     | Sequence (5'-3'):                                           |
| Expression                                                           | LptD_Yersinia    | LptD_Yersinia225_pET9_for | TACTTCCAATCCATGCTGGATTCTGATTCCGAACGCC                       |
|                                                                      | LptD_Yersinia    | LptD_Yersinia_pET9_rev    | TATCCACCTTTACTGTTATTAGAATGCGCTCTGATACGGCAG                  |
|                                                                      | LptE_Yersinia    | LptE_Yersinia_pCDF-SS_for | CTCCTAACACCTCGGGCTTTAACCTGCGTGGCAC                          |
|                                                                      | LptE_Yersinia    | LptE_Yersinia_pCDF-SS_rev | CATCCATCATCAATGGTATGGTATGGTGGTGGCCGAGGTTGAGACC              |
|                                                                      | LptD_Klebsiella  | LptD_Kleb_25f_NTT         | TACTTCCAATCCATGGCCGATCTGGCAACCCAGTG                         |
|                                                                      | LptD_Klebsiella  | LptD_Kleb_203f_NTT        | TACTTCCAATCCATGTTTAACTGGGTAGTGTGCCGATTTTCTACAGC             |
|                                                                      | LptD_Klebsiella  | LptD_Kleb_782r_NTT        | TATCCACCTTTACTGTTATTACAGACTAGACTGGTACGGCAGGATATTGC          |
|                                                                      | LptE_Klebsiella  | LptE_Kleb_20f             | CTCCTAACACCTCGGGTGGCATCTGCGTAGCAC                           |
|                                                                      | LptE_Klebsiella  | LptE_Kleb_196r            | CATCCATCATCAATGGTATGGTATGGTGGTGGCCAGCGTGGTG                 |
|                                                                      | LptD_Pseudomonas | LptD_Pseud_301f_NTT       | TACTTCCAATCCATGCTGCGTGTAAAGATTTTCCGGTCTTCTATACC             |
|                                                                      | LptD_Pseudomonas | LptD_Pseud_924r_NTT       | TATCCACCTTTACTGTTATTACATCGCTGATCTTCGGGTTG                   |
|                                                                      | LptE_Pseudomonas | LptE_Pseud_21f            | CTCCTAACACCTCGGGCTTCCAACCTGCGTGGTCTGG                       |
|                                                                      | LptE_Pseudomonas | LptE_Pseud_207r           | CATCCATCATCAATGGTATGGTATGGTGGTGGCCGAAATCAATCGG              |
|                                                                      | In vivo cloning  | LptD_Escherichia          | pBAD24_LptD_NcoI_for2                                       |
| LptD_Escherichia                                                     |                  | pBAD24_LptD_HindIII_rev2  | ACTGTTAAGCTTTCACAAAGTGTGTTGATACGGCAGAATG                    |
| LptD_Escherichia                                                     |                  | LptD_Cm.F                 | ACCGTTTGTACGCGCAACGTTACCGATGATGGAACAATAACCTGTGACGGAAGATCACT |
| Mutagenesis                                                          | LptD_Escherichia | LptD_Cm.R                 | TAACCGCACTGCGGATTACGTGGTAAATCACAAAATCACATTACGCCCCCCTGCCACT  |
|                                                                      | LptD_Escherichia | pBAD_LptD_cthis10_for     | CCATCACCATCACCATCACCATTTGAAAGCTTGGCTGTTTTG                  |
|                                                                      | LptD_Escherichia | pBAD_LptD_cthis10_rev     | TGATGGTGGCTGCCACCGCCACCAAGTGTGTTGATACGGC                    |
|                                                                      | LptD_Escherichia | LptD_Ec_G227C             | GTGACAAACGTCGCTCTGTTCTTGATCCCGAAC                           |
|                                                                      | LptD_Escherichia | LptD_Ec_Y314C             | TTCACGTCGTTGGTATTCTGCTGGAACCACTCCG                          |
|                                                                      | LptD_Escherichia | LptD_Ec_Y347C             | GCTACTTCAATGATTTCGATAACAAGTGGCTTCCAGTACTG                   |
|                                                                      | LptD_Escherichia | LptD_Ec_T351C             | TCGATAACAAGTACGGTTCAGTTGTGACGGTACCGC                        |
|                                                                      | LptD_Escherichia | LptD_Ec_D714C             | CCAATGCTAACCAAGCAAGCCTGCTATGTTAGGTGTGCAAT                   |
|                                                                      | LptD_Escherichia | LptD_Ec_G718C             | GCAAGCCGACTATGTTATGTGTGAATACAGCTC                           |
|                                                                      | LptD_Escherichia | LptD_Ec_I777C             | AGAGATGCTGCGTTGCAACTGCTGCGGTATCAAAACACT                     |
|                                                                      | LptD_Escherichia | LptD_Ec_L758C_2           | ACGCAATCGGCTTTAACATCGAATGTCGCGGCTGAG                        |
|                                                                      | LptD_Escherichia | LptD_Ec_M772C_2           | GGTCTGGGTACGCAAGAGTGCCTGCGTTCGAACATTCTG                     |
|                                                                      | LptD_Escherichia | LptD_p231a_f              | TTTCTTGATCGCAACGCCAAG                                       |

|                  |                  |                                                          |
|------------------|------------------|----------------------------------------------------------|
| LptD_Escherichia | LptD_p231a_r     | CCAGAGCGACGTTTGTCCAC                                     |
| LptD_Escherichia | LptD_p246a_f     | GTTCTACCTGGCATATTACTG                                    |
| LptD_Escherichia | LptD_p246a_r     | TCAAAGTAGTTGGTGGTG                                       |
| LptD_Escherichia | LptD_p231a_multi | GCGATGTTCCAGTAATATGCCAGGTAGAACTCAAAGTAG                  |
| LptD_Escherichia | LptD_p246a_multi | CTCTGGTTTCTTGATCGCGAACGCCAAGTACAC                        |
| LptD_Escherichia | LptD_r774e_f     | AGAGATGCTGGAATCGAACATTCTGCCG                             |
| LptD_Escherichia | LptD_r774e_r     | TGCGTACCCAGACCCGTAG                                      |
| LptD_Escherichia | LptD_r310e_f     | CAGTTCACGTGAATGGTTATTCTACTGG                             |
| LptD_Escherichia | LptD_r310e_r     | TCATCGTTCGGGTGTTTCATC                                    |
| LptD_Escherichia | LptD_e273q_e275q | TGGCAACATCATGTGGCAGAACCCAGTCCGCTACCTCTCCC                |
| LptD_Escherichia | LptD_e288q_d290n | GGGCGCTGGCTTGATGCAGCTGAATATCTGCCTTCAGA                   |
| LptD_Escherichia | LptD_d330n       | GTGGCGTTTCAACGTCAACTACACCAAGGTGAG                        |
| LptD_Escherichia | LptD_d342n_d344n | GCGATCCTAGTACTTCAATAATTTCAATAACAAGTACGGTTCAGT            |
| LptD_Escherichia | LptD_d352n       | ATAACAAGTACGGTTCCAGTACTAACGGCTACGCCAA                    |
| LptD_Escherichia | LptD_d749n       | GATAACGATAAACAACATGCGGTATATAACAACGCAATCGGC               |
| LptD_Escherichia | LptD_e273k_e275k | GTGGCAACATCATGTGGGAAGAACAATTCGCTACCTCTCC                 |
| LptD_Escherichia | LptD_e288k_d290k | GCGGGCGCTGGCTTGATGAACTGAAGTATCTGCCTTCAGATAAA             |
| LptD_Escherichia | LptD_d330k       | GTGGCGTTTCAACGTCAAGTACACCAAGGTGACGG                      |
| LptD_Escherichia | LptD_d342k_d344k | GGTCAGCGATCCTAGTACTTCAATAAGTCAAGAACAAAGTACGGTTCAGTACTGAC |
| LptD_Escherichia | LptD_d352k       | CGATAACAAGTACGGTTCAGTACTAAGGGCTACGCCAACGC                |
| LptD_Escherichia | LptD_d749k       | GGGATAACGATAAACAACATGCGGTATATAAGAACGCAATCGGCTTTA         |

For purification, cells were resuspended in lysis buffer (50 mM Tris-HCl pH 7.5, 200 mM NaCl, 1 mM MgCl<sub>2</sub>, 10 µg/ml DNaseI, 100 µg/ml 4-(2-aminoethyl)benzenesulphonyl fluoride (AEBSF)) and lysed by three passages through an Emulsiflex C3 (Avestin) homogenizer at 4°C. The lysate was centrifuged at 10,000g for 10 min to remove unlysed cells and the supernatant was incubated with 2% (v/v) Triton X-100 for 30 min at 4°C. Membranes were isolated from the lysate by centrifugation at 234,000g for 60 min at 4°C. The pellet was resuspended in buffer containing 50 mM Tris-HCl pH 7.5, 200 mM NaCl, and 20 mM imidazole and solubilized by constant stirring in 5% (w/v) Elugent (Millipore Merck) for 16 h at 4°C. Insoluble material was removed by centrifugation at 370,000g for 60 min at 4°C. The supernatant was filtered and applied to a 15-ml Ni-NTA column (Qiagen) equilibrated in 50 mM K<sub>2</sub>HPO<sub>4</sub> pH 7.5, 200 mM NaCl, 10% (v/v) glycerol, 20 mM imidazole, and 0.1% (w/v) dodecyl maltoside (DDM) (Anatrace). Protein was eluted with 250 mM imidazole and peak fractions were pooled and dialysed against 25 mM Tris-HCl pH 8.0 containing 0.6 mM EDTA pH 8.0 for 16 h at 4°C. The sample was applied to a 10 mL Q-Sepharose column (GE Healthcare) equilibrated with 25 mM Tris HCl pH 8.0, 0.6 mM EDTA, and 0.1% DDM and eluted with a linear gradient of 0-0.6 M NaCl. Peak fractions were then concentrated and applied to a S-300HR Sephacryl size exclusion column (GE Healthcare) equilibrated in 20 mM Tris-HCl pH 7.5, 200 mM NaCl, and 0.8% C<sub>8</sub>E<sub>4</sub>.

### ***ΔlptD strain and Phage lysate generation***

First, pBAD24\_LptD\_WT was electroporated into *E. coli* strain NM1100 containing a chromosomal lambda Red system (Bougdour et al., 2008) and plated on LB agar containing 50 µg/ml ampicillin. After O/N incubation at 32°C, a single transformant was grown in LB broth containing 50 µg/ml ampicillin at 32°C to an OD<sub>600</sub> of 0.6. These cultures were then placed in a shaking 42°C water bath for 15 min to induce lambda gene expression and then immediately cooled in an ice-water slurry. Cells were pelleted at 4°C and washed three times with ice-cold ultrapure water. Final pellets were resuspended in 1/100 of the original culture volume in ice-cold ultrapure water containing 10% (v/v) glycerol and either used immediately or frozen. In parallel, the chloramphenicol resistance cassette from pCAT19 (Fuqua, 1992) was PCR amplified using primers lptD\_Cm.F and lptD\_Cm.R. These primers contain 5' overhangs incorporating 40 bp of complementary sequence upstream and downstream of the *lptD* gene. The PCR product was electroporated into NM1100 containing pBAD24\_LptD\_WT prepared as described above. After re-suspension in 1 ml of LB broth and recovery at 37°C for 1 hour, cells were spread on LB plates containing 50 µg/ml ampicillin, 10 µg/ml chloramphenicol, and 1% (w/v) arabinose. The plates were incubated O/N at 37°C to select for colonies carrying the chromosomal *lptD* deletion and pBAD24\_LptD\_WT. The chromosomal insertion of the chloramphenicol cassette at the *lptD* locus was verified by PCR.

The *ΔlptD* cells were grown at 37°C in LB medium containing 50 µg/ml ampicillin, 1% (w/v) arabinose, 0.01 M MgSO<sub>4</sub>, and 0.005 M CaCl<sub>2</sub>. At an OD<sub>600</sub> of ~ 0.1-0.2 P1vir phage was added and the culture was grown 4 h at



37°C or until complete lysis was observed. A couple of drops of chloroform were added to lyse any remaining cells and the culture was centrifuged to remove debris. The supernatant was collected, two additional drops of chloroform were added, and the sample was stored at 4°C.

### ***LptD localization assay***

Glycerol stocks of MG1655 *E. coli* cells containing pBAD24\_LptD\_WTcHis and mutant variants were inoculated into 500 mL TB medium containing 50 µg/ml ampicillin and 0.2% (w/v) arabinose. Cultures were grown overnight at 37°C and harvested. Cell pellets were resuspended in 40 mL of buffer containing 50 mM Tris HCl pH 7.5, 200 mM NaCl, 0.4 mg DNase I, and 4 mg AEBSF. The cell suspension was lysed via three passes through an Emulsiflex C3 (Avestin) homogenizer at 4°C. The lysate was centrifuged (7,000g, 4°C, 10 min) to remove unbroken cells and the supernatant was centrifuged at 234,000g for 1h at 4°C to collect membranes. The membrane pellet was resuspended in 15 mL of 50 mM Tris HCl pH 7.5 and 200 mM NaCl. Samples were mixed 1:1 with 4X LDS buffer (Invitrogen) containing 5% (v/v) β-mercaptoethanol, heated at 99°C for 20 min, and then centrifuged at 20,000g for 20 min. Aliquots (5 µl) of each sample were run on 4-12% Bis-Tris NuPAGE gels (Invitrogen) and transferred to PVDF membranes for immunoblotting. The membranes were blocked for 2 h in PBS containing 2% (w/v) BSA and 0.1% (v/v) Tween. An antihistidine HRP conjugated antibody (Sigma) was used to detect the C-terminal 10X histidine tag present in all of the LptD constructs. The blots were developed using SIGMAFAST 3,3'-diaminobenzidine solution (Sigma).

| Protein                       | PaLptDE (5IVA)      |                     | PaLptDE + C-terminus (model) |                     | KpLptDE(5IV8/5IV9) |                     | YpLptDE (5IXM)     |                     | StLptDE (4N4R)     |                     | SfLptDE (4Q35)      |                     | EcLptDE (4RHB)     |                    |
|-------------------------------|---------------------|---------------------|------------------------------|---------------------|--------------------|---------------------|--------------------|---------------------|--------------------|---------------------|---------------------|---------------------|--------------------|--------------------|
| Monomer                       | LptE (B)            | LptD (A)            | LptE (B)                     | LptD (A)            | LptE (B)           | LptD (A)            | LptE (H)           | LptD (G)            | LptE (B)           | LptD (A)            | LptE (B)            | LptD (A)            | LptE (B)           | LptD (A)           |
| <b>Nr of atoms</b>            |                     |                     |                              |                     |                    |                     |                    |                     |                    |                     |                     |                     |                    |                    |
| in interface                  | 292<br>(24.5%)      | 368<br>(7.7%)       | 313<br>(26.3%)               | 386<br>(7.9%)       | 289<br>(25.8%)     | 364<br>(8.4%)       | 292<br>(26.3%)     | 365<br>(8.6%)       | 315<br>(26.8%)     | 392<br>(9.0%)       | 300<br>(25.4%)      | 378 (6.2%)          | 307<br>(26.0)      | 396<br>(8.7)       |
| on the surface                | 815<br>(68.4%)      | 3058<br>(64.3%)     | 813<br>(68.2%)               | 3125<br>(63.7%)     | 751<br>(67.1%)     | 2823<br>(65.3%)     | 771<br>(69.3%)     | 2795<br>(66.0%)     | 799<br>(67.9%)     | 2830<br>(64.8%)     | 780<br>(66.0%)      | 3961<br>(64.7%)     | 790<br>(66.9)      | 2888<br>(63.3)     |
| Total                         | 1192<br>(100.0%)    | 4755<br>(100.0%)    | 1192<br>(100.0%)             | 4909<br>(100.0%)    | 1119<br>(100.0%)   | 4324<br>(100.0%)    | 1112<br>(100.0%)   | 4237<br>(100.0%)    | 1176<br>(100.0%)   | 4370<br>(100.0%)    | 1181<br>(100.0%)    | 6126<br>(100.0%)    | 1181<br>(100.0)    | 4564<br>(100.0)    |
| <b>Nr of residues</b>         |                     |                     |                              |                     |                    |                     |                    |                     |                    |                     |                     |                     |                    |                    |
| in interface                  | 69<br>(45.4%)       | 105<br>(18.1%)      | 72<br>(47.4%)                | 111<br>(18.6%)      | 70<br>(47.9%)      | 116<br>(21.5%)      | 70<br>(49.6%)      | 111<br>(21.0%)      | 70<br>(46.4%)      | 114<br>(21.4%)      | 71<br>(47.3%)       | 117<br>(15.4%)      | 72<br>(48.0)       | 118<br>(21.2)      |
| on the surface                | 151<br>(99.3%)      | 573<br>(99.0%)      | 149<br>(99.0%)               | 590<br>(98.8%)      | 140<br>(95.9%)     | 534<br>(98.9%)      | 141<br>(100.0%)    | 522<br>(98.9%)      | 142<br>(94.0%)     | 530<br>(99.6%)      | 145<br>(96.7%)      | 750<br>(98.9%)      | 145<br>(96.7)      | 546<br>(98.2)      |
| Total                         | 152<br>(100.0%)     | 579<br>(100.0%)     | 152<br>(100.0%)              | 597<br>(100.0%)     | 146<br>(100.0%)    | 540<br>(100.0%)     | 141<br>(100.0%)    | 528<br>(100.0%)     | 151<br>(100.0%)    | 532<br>(100.0%)     | 150<br>(100.0%)     | 758<br>(100.0%)     | 150<br>(100.0)     | 556<br>(100.0)     |
| Accessible Surface area       |                     |                     |                              |                     |                    |                     |                    |                     |                    |                     |                     |                     |                    |                    |
| Buried (sqÅ)                  | 2860.3<br>(28.0%)   | 2518.5<br>(8.1%)    | 3385.0<br>(33.1%)            | 3079.0<br>(9.9%)    | 3274.8<br>(34.9%)  | 3038.0<br>(10.4%)   | 3309.2<br>(34.7%)  | 3024.3<br>(10.5%)   | 3441.7<br>(34.7%)  | 3168.2<br>(11.0%)   | 3477.6<br>(34.8%)   | 3085.2<br>(7.8%)    | 3527.5<br>(35.2)   | 3168.5<br>(10.7)   |
| Total (sqÅ)                   | 10220.2<br>(100.0%) | 30932.1<br>(100.0%) | 10219.0<br>(100.0%)          | 31236.5<br>(100.0%) | 9384.6<br>(100.0%) | 29155.5<br>(100.0%) | 9532.1<br>(100.0%) | 28834.1<br>(100.0%) | 9925.7<br>(100.0%) | 28857.6<br>(100.0%) | 99986.0<br>(100.0%) | 39325.5<br>(100.0%) | 10025.2<br>(100.0) | 29500.9<br>(100.0) |
| Solvation E (kcal/mol)        | -113.6              | -423.4              | -112.9                       | -436.4              | -122.0             | -362.0              | -106.0             | -382.1              | -109.0             | -378.2              | -131.7              | -560.1              | -128.8             | -386.1             |
| H-bonds                       | 35                  |                     | 29                           |                     | 29                 |                     | 29                 |                     | 46                 |                     | 40                  |                     | 31                 |                    |
| Salt bridges                  | 17                  |                     | 21                           |                     | 21                 |                     | 22                 |                     | 42                 |                     | 24                  |                     | 19                 |                    |
|                               |                     |                     |                              |                     | core               | full                |                    |                     |                    |                     | core                | full                |                    |                    |
| *Molec Vol Å <sup>3</sup>     | 93,170              |                     | 95,750                       |                     | 88,090             | 114,700             | 88,770             |                     | 87,750             |                     | 90,610              | 113,800             | 90,010             |                    |
| *Molec Surf Å <sup>2</sup>    | 36,310              |                     | 36,650                       |                     | 32,500             | 43,830              | 33,460             |                     | 32,900             |                     | 34,280              | 43,650              | 33,410             |                    |
| **Lumen Vol Å <sup>3</sup>    | -                   |                     | 9,695                        |                     | 8,972              |                     | 7,710              |                     | 8,030              |                     | 9,380               |                     | 8,290              |                    |
| **Surface Area Å <sup>2</sup> | -                   |                     | 4,096                        |                     | 4,241              |                     | 3,964              |                     | 4,011              |                     | 3,967               |                     | 3,385              |                    |

**Table S2** (related to Figure 2): **Surface area and volume analysis of known LptDE core structures.** The analysis was carried out with QtPISA (E.B. Krissinel and K. Henrick (2007) Inference of macromolecular assemblies from crystalline state, J.Mol.Biol. 372 774-797).

**\*Molecular volume and surface area of full-length and core complexes.** Analysis performed with UCSF Chimera (UCSF Chimera – a visualization system for exploratory research and analysis. (2004) Pettersen EF, Goddard TD, Huang CC, Couch GS, Greenblatt DM, Meng, EC, Ferrin TE. J Comput Chem. 13, 1605-12).

**\*\*Luminal volume and surface area of known LptDE core complexes.** The luminal cavities were identified and their volumes calculated with the Voss Volume Voxelator webserver (Voss, NR, Gerstein, M (2010) 3V: cavity, channel and cleft volume calculator and extractor).

## Supplemental Experimental Procedures

### *Cloning, expression and purification of LptDE*

Primer names and sequences used for LIC cloning are listed in the Table below. The modified pET9 vector, into which LptD was inserted, contained an N-terminal PelB signal sequence, a 10X His tag, a TEV site, and LIC cloning sites. The modified pCDF-1b vector for LptE expression contained the PelB signal sequence, LIC cloning sites, and a C-terminal 6X His tag. LptD and LptE for each species were co-expressed in BL21 (DE3) cells in TB media supplemented with 50µg/ml kanamycin and 25µg/ml streptomycin to stationary phase (3-4 days). The cells were grown at 21°C without IPTG induction.

To make the pBAD24\_LptD\_WT plasmid, *E. coli* LptD (residues 1 – 784) was cloned into pBAD24 using primers pBAD24\_LptD\_NcoI\_for2 and pBAD24\_LptD\_HindIII\_rev2. A C-terminal 10X histidine tag was subsequently inserted into this vector using primers pBAD\_LptD\_chis10\_for and pBAD\_LptD\_chis10\_rev to create pBAD24\_LptD\_WTcHis. This vector and its mutant derivatives were used in the LptD knock-out and localization assays.

| Primer sequences and names/numbers for constructs used in this study |                     |                                                   |                                                              |
|----------------------------------------------------------------------|---------------------|---------------------------------------------------|--------------------------------------------------------------|
| Function:                                                            | Gene:               | Name:                                             | Sequence (5'-3'):                                            |
| Expression                                                           | LptD_Yersinia       | LptD_Yersinia225_pET9_for                         | TACTTCCAATCCATGTCTGGATTCTGATTCCGAACGCC                       |
|                                                                      | LptD_Yersinia       | LptD_Yersinia_pET9_rev                            | TATCCACCTTTACTGTTATTAGAATGCGCTCTGATACGGCAG                   |
|                                                                      | LptE_Yersinia       | LptE_Yersinia_pCDF-SS_for                         | CTCCTAACACCTCGGGCTTTAACCTGCGTGGCAC                           |
|                                                                      | LptE_Yersinia       | LptE_Yersinia_pCDF-SS_rev                         | CATCCATCATCAATGGTGATGGTGATGGTGTGGCCGAGGTTGAGACC              |
|                                                                      | LptD_Klebsiella     | LptD_Kleb_25f_NTT                                 | TACTTCCAATCCATGGCCGATCTGGCAACCCAGTG                          |
|                                                                      | LptD_Klebsiella     | LptD_Kleb_203f_NTT                                | TACTTCCAATCCATGTTTAAACTGGGTAGTGTGCCGATTTCCTACAGC             |
|                                                                      | LptD_Klebsiella     | LptD_Kleb_782r_NTT                                | TATCCACCTTTACTGTTATTACAGACTAGACTGGTACGGCAGGATATTGC           |
|                                                                      | LptE_Klebsiella     | LptE_Kleb_20f                                     | CTCCTAACACCTCGGGTTGGCATCTGCGTAGCAC                           |
|                                                                      | LptE_Klebsiella     | LptE_Kleb_196r                                    | CATCCATCATCAATGGTGATGGTGATGGTGTGGCCGAGCGTGGTG                |
|                                                                      | LptD_Pseudomonas    | LptD_Pseud_301f_NTT                               | TACTTCCAATCCATGTCTGGTGTAAAGATTTTCCGGTCTTCTATACC              |
| LptD_Pseudomonas                                                     | LptD_Pseud_924r_NTT | TATCCACCTTTACTGTTATTACATCGCTGATCTTCGGGTTG         |                                                              |
| LptE_Pseudomonas                                                     | LptE_Pseud_21f      | CTCCTAACACCTCGGGCTTCCAAGTGGTGGTCTGG               |                                                              |
| LptE_Pseudomonas                                                     | LptE_Pseud_207r     | CATCCATCATCAATGGTGATGGTGATGGTGGGGGTGGAAATTCAATCGG |                                                              |
| In vivo cloning                                                      | LptD_Escherichia    | pBAD24_LptD_NcoI_for2                             | TCGTTACCATTGGATGAAAAACGTATCCCACCTCTCTCTGG                    |
|                                                                      | LptD_Escherichia    | pBAD24_LptD_HindIII_rev2                          | ACTGTTAAGCTTTCACAAAGTGTTTGATACGGCAGAAATG                     |
|                                                                      | LptD_Escherichia    | lptD_Cm.F                                         | ACCGTTTGTACGGCGCAACGTTACCGATGATGGAACAATAACCTGTGACGGAAGATCACT |
|                                                                      | LptD_Escherichia    | lptD_Cm.R                                         | TAACCGCACTGCGGATTACGGTAAATCAACAAATCACATTACGCCCGCCTGCCACT     |
| Mutagenesis                                                          | LptD_Escherichia    | pBAD_LptD_cthis10_for                             | CCATCACCATCACCATCACCATTGAAAGCTTGGCTGTTTTG                    |
|                                                                      | LptD_Escherichia    | pBAD_LptD_cthis10_rev                             | TGATGGTGGCTGCCACCGCCACCAAAGTGTTTTGATACGGC                    |
|                                                                      | LptD_Escherichia    | LptD_Ec_G227C                                     | GTGACAAACGTCGCTCTTGTCTTCTGATCCCGAAC                          |
|                                                                      | LptD_Escherichia    | LptD_Ec_Y314C                                     | TTACGTCGTGGTTATTCTGTGGAACCACTCGG                             |
|                                                                      | LptD_Escherichia    | LptD_Ec_Y347C                                     | GCTACTTCAATGATTTCGATAACAAGTGGGTTCCAGTACTG                    |
|                                                                      | LptD_Escherichia    | LptD_Ec_T351C                                     | TCGATAACAAGTACGGTTCAGTGTGACGGCTACGC                          |
|                                                                      | LptD_Escherichia    | LptD_Ec_D714C                                     | CCAATGCTAACAAGCAAGCTGCTATGTTAGGTGTGCAAT                      |
|                                                                      | LptD_Escherichia    | LptD_Ec_G718C                                     | GCAAGCGACTCTATGTTATGTGTGCAATACAGCTC                          |
|                                                                      | LptD_Escherichia    | LptD_Ec_I777C                                     | AGAGATGTCGGTTCGAAGTGTCTGCGGTATCAAAACACT                      |
|                                                                      | LptD_Escherichia    | LptD_Ec_L758C_2                                   | ACGCAATCGGCTTTAAACATCGAATGTGCGGCGCTGAG                       |
|                                                                      | LptD_Escherichia    | LptD_Ec_M772C_2                                   | GGTCTGGGTACGCAAGAGTGCCTGCGTTCGAACATTCTG                      |
|                                                                      | LptD_Escherichia    | LptD_p231a_f                                      | TTTCTTGATCGCGAACGCCAAG                                       |
|                                                                      | LptD_Escherichia    | LptD_p231a_r                                      | CCAGAGCGACGTTGTGAC                                           |
|                                                                      | LptD_Escherichia    | LptD_p246a_f                                      | GTTCTACCTGGCATATTACTG                                        |
|                                                                      | LptD_Escherichia    | LptD_p246a_r                                      | TCAAAGTAGTTGGTGGTG                                           |
|                                                                      | LptD_Escherichia    | LptD_p231a_multi                                  | GCGATGTTCCAGTAATATGCCAGGTAGAAGTCAAAGTAG                      |
|                                                                      | LptD_Escherichia    | LptD_p246a_multi                                  | CTCTGGTTTCTTGTGTCGGAAGCCAAAGTACAC                            |
|                                                                      | LptD_Escherichia    | LptD_r774e_f                                      | AGAGATGCTGGAATCGAACAATTCTGCGG                                |
|                                                                      | LptD_Escherichia    | LptD_r774e_r                                      | TGCGTACCCAGACCGTATG                                          |
|                                                                      | LptD_Escherichia    | LptD_r310e_f                                      | CAGTTCACGTGAATGGTTATTCTACTGG                                 |
|                                                                      | LptD_Escherichia    | LptD_r310e_r                                      | TCATCGTTCGGGTGTTCAATC                                        |
|                                                                      | LptD_Escherichia    | LptD_e273q_e275q                                  | TGGCAACATCATGTGGCAGAACCAGTTCCGCTACCTCTCCC                    |
|                                                                      | LptD_Escherichia    | LptD_e288q_d290n                                  | GGGCGCTGGCTTGATGCAGCTGAACATATCGCTTCCAGA                      |
|                                                                      | LptD_Escherichia    | LptD_d330n                                        | GTGGCGTTTCAACGCTCAACTACCAAGGTACAG                            |
|                                                                      | LptD_Escherichia    | LptD_d342n_d344n                                  | GCGATCCTAGCTACTTCAATAATTTCAATAACAAGTACGGTTCAGT               |
|                                                                      | LptD_Escherichia    | LptD_d352n                                        | ATAACAAGTACGGTTCAGTACTAACGGCTACGCCAA                         |
|                                                                      | LptD_Escherichia    | LptD_d749n                                        | GATAACGATAAACAACATGCGGTATATAACAACGCAATCGGC                   |

|  |                  |                  |                                                          |
|--|------------------|------------------|----------------------------------------------------------|
|  | LptD_Escherichia | LptD_e273k_e275k | GTGGCAACATCATGTGGAAGAACAAATTCGCTACCTCTCC                 |
|  | LptD_Escherichia | LptD_e288k_d290k | GCGGGCGCTGGCTTGATGAAACTGAAGTATCTGCCTCAGATAAA             |
|  | LptD_Escherichia | LptD_d330k       | GTGGCGTTTCAACGTCAAGTACACCAAGGTCAGCG                      |
|  | LptD_Escherichia | LptD_d342k_d344k | GGTCAGCGATCCTAGTACTTCAATAAGTTCAAGAACAAGTACGGTCCAGTACTGAC |
|  | LptD_Escherichia | LptD_d352k       | CGATAACAAGTACGGTTCAGTACTAAGGGCTACGCAACGC                 |
|  | LptD_Escherichia | LptD_d749k       | GGGATAACGATAAACACATGCGGTATATAAGAACGCAATCGGCTTTA          |

For purification, cells were resuspended in lysis buffer (50 mM Tris-HCl pH 7.5, 200 mM NaCl, 1 mM MgCl<sub>2</sub>, 10 µg/ml DNaseI, 100 µg/ml 4-(2-aminoethyl)benzenesulphonyl fluoride (AEBSF)) and lysed by three passages through an Emulsiflex C3 (Avestin) homogenizer at 4°C. The lysate was centrifuged at 10,000g for 10 min to remove unlysed cells and the supernatant was incubated with 2% (v/v) Triton X-100 for 30 min at 4°C. Membranes were isolated from the lysate by centrifugation at 234,000g for 60 min at 4°C. The pellet was resuspended in buffer containing 50 mM Tris-HCl pH 7.5, 200 mM NaCl, and 20 mM imidazole and solubilized by constant stirring in 5% (w/v) Elugent (Millipore Merck) for 16 h at 4°C. Insoluble material was removed by centrifugation at 370,000g for 60 min at 4°C. The supernatant was filtered and applied to a 15-ml Ni-NTA column (Qiagen) equilibrated in 50 mM K<sub>2</sub>HPO<sub>4</sub> pH 7.5, 200 mM NaCl, 10% (v/v) glycerol, 20 mM imidazole, and 0.1% (w/v) dodecyl maltoside (DDM) (Anatrace). Protein was eluted with 250 mM imidazole and peak fractions were pooled and dialysed against 25 mM Tris-HCl pH 8.0 containing 0.6 mM EDTA pH 8.0 for 16 h at 4°C. The sample was applied to a 10 mL Q-Sepharose column (GE Healthcare) equilibrated with 25 mM Tris HCl pH 8.0, 0.6 mM EDTA, and 0.1% DDM and eluted with a linear gradient of 0-0.6 M NaCl. Peak fractions were then concentrated and applied to a S-300HR Sephacryl size exclusion column (GE Healthcare) equilibrated in 20 mM Tris-HCl pH 7.5, 200 mM NaCl, and 0.8% C<sub>8</sub>E<sub>4</sub>.

### ***ΔlptD strain and Phage lysate generation***

First, pBAD24\_LptD\_WT was electroporated into *E. coli* strain NM1100 containing a chromosomal lambda Red system (Bougourd et al., 2008) and plated on LB agar containing 50 µg/ml ampicillin. After O/N incubation at 32°C, a single transformant was grown in LB broth containing 50 µg/ml ampicillin at 32°C to an OD<sub>600</sub> of 0.6. These cultures were then placed in a shaking 42°C water bath for 15 min to induce lambda gene expression and then immediately cooled in an ice-water slurry. Cells were pelleted at 4°C and washed three times with ice-cold ultrapure water. Final pellets were resuspended in 1/100 of the original culture volume in ice-cold ultrapure water containing 10% (v/v) glycerol and either used immediately or frozen. In parallel, the chloramphenicol resistance cassette from pCAT19 (Fuqua, 1992) was PCR amplified using primers lptD\_Cm.F and lptD\_Cm.R. These primers contain 5' overhangs incorporating 40 bp of complementary sequence upstream and downstream of the *lptD* gene. The PCR product was electroporated into NM100 containing pBAD24\_LptD\_WT prepared as described above. After re-suspension in 1 ml of LB broth and recovery at 37°C for 1 hour, cells were spread on LB plates containing 50 µg/ml ampicillin, 10 µg/ml chloramphenicol, and 1% (w/v) arabinose. The plates were incubated O/N at 37°C to select for colonies carrying the chromosomal *lptD* deletion and pBAD24\_LptD\_WT. The chromosomal insertion of the chloramphenicol cassette at the *lptD* locus was verified by PCR.

The  $\Delta$ *lptD* cells were grown at 37°C in LB medium containing 50 µg/ml ampicillin, 1% (w/v) arabinose, 0.01 M MgSO<sub>4</sub>, and 0.005 M CaCl<sub>2</sub>. At an OD<sub>600</sub> of ~ 0.1-0.2 P1vir phage was added and the culture was grown 4 h at 37°C or until complete lysis was observed. A couple of drops of chloroform were added to lyse any remaining cells and the culture was centrifuged to remove debris. The supernatant was collected, two additional drops of chloroform were added, and the sample was stored at 4°C.

### ***LptD localization assay***

Glycerol stocks of MG1655 *E. coli* cells containing pBAD24\_LptD\_WT<sub>His</sub> and mutant variants were inoculated into 500 mL TB medium containing 50 µg/ml ampicillin and 0.2% (w/v) arabinose. Cultures were grown overnight at 37°C and harvested. Cell pellets were resuspended in 40 mL of buffer containing 50 mM Tris HCl pH 7.5, 200 mM NaCl, 0.4 mg DNase I, and 4 mg AEBSF. The cell suspension was lysed via three passes through an Emulsiflex C3 (Avestin) homogenizer at 4°C. The lysate was centrifuged (7,000g, 4°C, 10 min) to remove unbroken cells and the

supernatant was centrifuged at 234,000g for 1h at 4°C to collect membranes. The membrane pellet was resuspended in 15 mL of 50 mM Tris HCl pH 7.5 and 200 mM NaCl. Samples were mixed 1:1 with 4X LDS buffer (Invitrogen) containing 5% (v/v)  $\beta$ -mercaptoethanol, heated at 99°C for 20 min, and then centrifuged at 20,000g for 20 min. Aliquots (5  $\mu$ l) of each sample were run on 4-12% Bis-Tris NuPAGE gels (Invitrogen) and transferred to PVDF membranes for immunoblotting. The membranes were blocked for 2 h in PBS containing 2% (w/v) BSA and 0.1% (v/v) Tween. An antihistidine HRP conjugated antibody (Sigma) was used to detect the C-terminal 10X histidine tag present in all of the LptD constructs. The blots were developed using SIGMAFAST 3,3'-diaminobenzidine solution (Sigma).
